# Supplementary material for: A Method for Bridging Population-Specific Genotypes to Detect Gene Modules Associated with Alzheimer’s Disease
Source: Cells. 2022 Jul 16;11(14):2219. doi: 10.3390/cells11142219 (PMC9319087; doi:10.3390/cells11142219)
Supplement: Supplementary file 1 [file cells-11-02219-s001.zip]

Archive with 4 entries (4 files):
- Supp_figures.pdf
- TableS1.xlsx
- TableS2.xlsx
- TableS3.xlsx
