# Supplementary material for: A Method for Bridging Population-Specific Genotypes to Detect Gene Modules Associated with Alzheimer’s Disease
Source: Cells. 2022 Jul 16;11(14):2219. doi: 10.3390/cells11142219 (PMC9319087; doi:10.3390/cells11142219)

## Supplementary Figures

# A method for bridging population-specific genotypes to detect gene modules associated with Alzheimer's disease

Yulin Dai<sup>1</sup>, Peilin Jia<sup>1</sup>, Zhongming Zhao<sup>1</sup> and Assaf Gottlieb<sup>1, \*</sup>

<sup>1</sup> Center for precision health, School of Biomedical informatics, University of Texas Health Science Center at Houston, Houston, TX, 77030

### Figures

**Figure S1.** The projection of the African population samples on the top three principal components

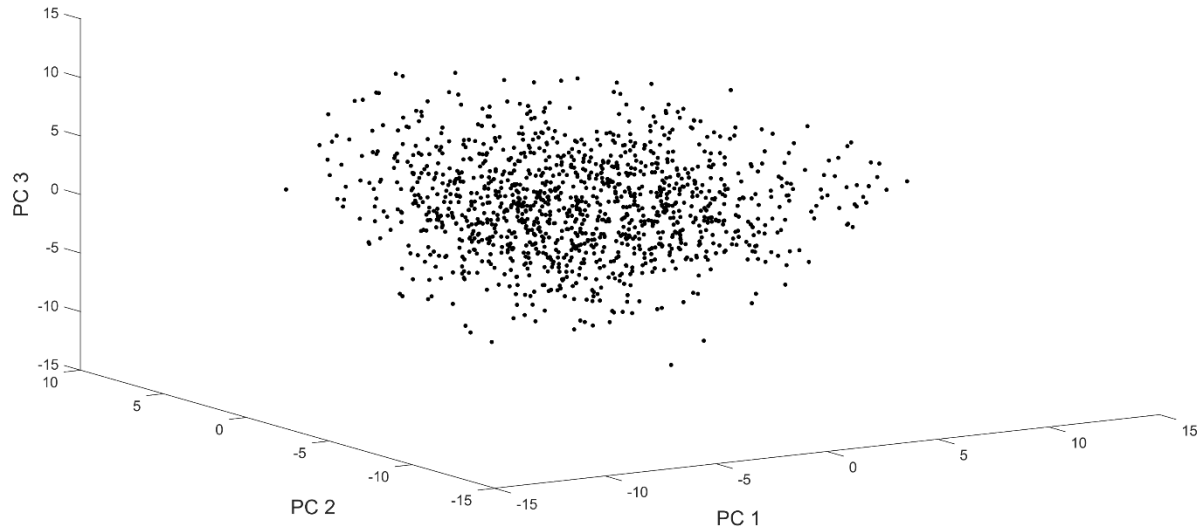

**Figure S2.** The projection of the Hispanic population samples on the top three principal components

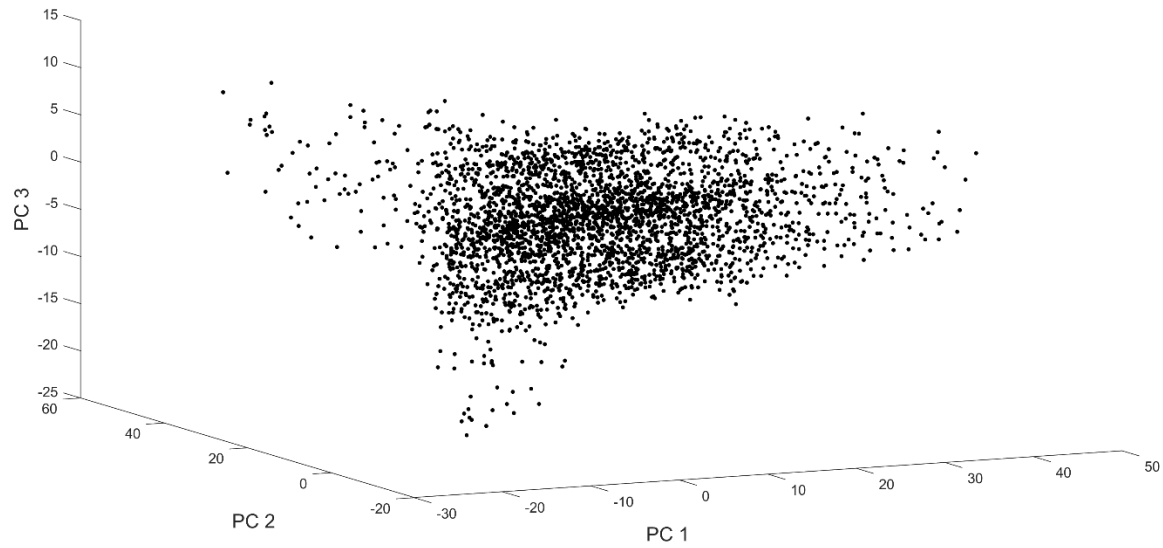

**Figure S3.** The projection of the White population samples on the top three principal components

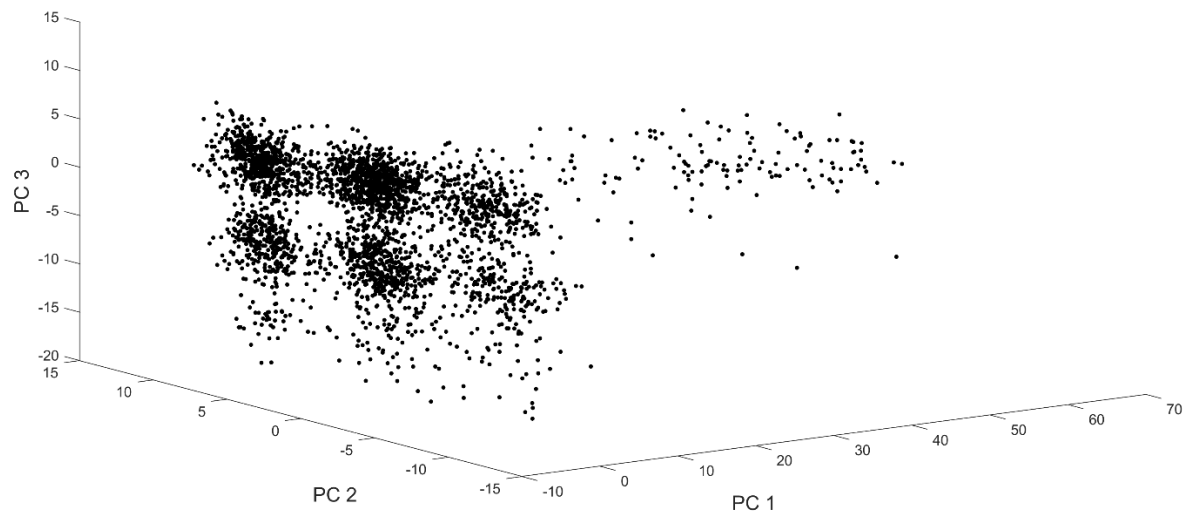

Supplement: Supplementary file 1 [file cells-11-02219-s001.zip › Supp_figures.pdf]
