# Supplementary material for: A Method for Bridging Population-Specific Genotypes to Detect Gene Modules Associated with Alzheimer’s Disease
Source: Cells. 2022 Jul 16;11(14):2219. doi: 10.3390/cells11142219 (PMC9319087; doi:10.3390/cells11142219)
Supplement: Supplementary file 1 [file cells-11-02219-s001.zip › TableS1.xlsx]

## Sheet: Sheet1
Gene name	Gene name	Gene name	Gene name	Gene name	Gene name
ABCA3	CEP135	GIGYF1	MCUR1	PRKD2	TENC1
ACAT1	CEP192	GNAQ	MNDA	PRNP	TGM1
ACOT2	CERS1	GOSR1	MPRIP	PRPF4	THBS3
ACTG1	CHD1L	GPC1	MRPL20	PSMD4	TJP2
AGPS	CISD3	GRWD1	MTHFD1L	PSMG4	TMCO1
AIMP1	CNTRL	HIP1R	MTRF1L	PTGR2	TMEM128
AKT1	COG4	HIST1H1C	MYO6	PTPRS	TMEM218
AMT	COQ9	HIST1H3A	NAGK	RABIF	TRAF1
ANAPC4	CPSF3L	HLA-B	NDUFAF4	RCC1	TRAP1
ANO7	CSGALNACT2	HLA-C	NEK1	RMDN3	TRIM4
APPBP2	CUL7	HLA-DRB1	NF2	RNPS1	TTLL13
ARF6	CYTH2	HLA-DRB5	NIPSNAP1	RPIA	TTLL5
ARNT	D2HGDH	HLA-H	NME7	RPL18A	TUBA1A
ARPC5L	DCDC2	HMOX2	NOS2	RPL36AL	UBR5
ATP6V0A1	DDX42	HSD17B14	NRAS	RPS25	UPK1A
ATXN2	DLD	HSPA5	NSRP1	S100A10	VASN
BOLA2	DRG2	INCA1	NUPR1	SCN3B	VEZT
BPHL	DYRK1A	IQGAP1	PCDHB5	SEC14L4	VSIG8
BTN2A2	EAF1	ITGA3	PEBP1	SFI1	WDR41
C19orf44	ECT2	JMJD6	PEX14	SGSM3	WDR75
C1orf109	ENDOG	KAT7	PFKL	SIRT6	WWP2
C1orf86	FAM118A	KCNJ6	PHF5A	SLC39A2	YBEY
C1QTNF2	FAM213A	KCTD15	PICK1	SMPD3	YWHAE
C4orf27	FBXO25	KIF14	PLEC	SNAP47	YWHAG
CAPZA2	FBXO6	KRI1	POLR1A	SNRNP27	YWHAH
CAV2	FBXO7	LRRK2	POLR2C	SNRPC	ZDHHC18
CBR1	FBXW11	LTBR	POLR2E	SP110	ZGPAT
CCDC146	FGFR1	MAP2K2	POR	SRGAP2	ZKSCAN1
CCDC154	FGGY	MAP3K3	PPHLN1	STX6	ZNF23
CD3EAP	FSD2	MAPK9	PPP2R1B	TDGF1	ZSCAN1
CDK6	FYCO1
