# Supplementary material for: A Method for Bridging Population-Specific Genotypes to Detect Gene Modules Associated with Alzheimer’s Disease
Source: Cells. 2022 Jul 16;11(14):2219. doi: 10.3390/cells11142219 (PMC9319087; doi:10.3390/cells11142219)
Supplement: Supplementary file 1 [file cells-11-02219-s001.zip › TableS2.xlsx]

## Sheet: African
Tissue	Gene Modules for African population	Raw p-value in Hispanic population	Raw p-value in White population	FDR Adjusted p-value in Hispanic population	FDR Adjusted p-value in White population
Amygdala	ANXA1, EMC2, LONP1, METTL3, SURF1, TIMM44, USP30	0.0002	0.0004	0.0015	0.011
Amygdala	MYOC, RPIA, TKT, TRIM32, VPS11, VPS8	0.0086	0.0166	0.0168929	0.04565
Amygdala	ANXA1, C4A, EMC2, LONP1, METTL3	0	0.0043	0	0.0223667
Amygdala	CORO2A, HESX1, LAMTOR5, NR1H2, RBP4	0.0005	0.0006	0.00196429	0.011
Amygdala	ANO5, NUP50, RNGTT	0.0085	0.0081	0.0168929	0.0278438
Amygdala	ANO5, GADD45GIP1, NUP50, RNGTT	0.0035	0.0057	0.00875	0.0223667
Amygdala	ANXA1, EMC2, LONP1, METTL3, PGAP3, TBRG4	0.0003	0.0135	0.0015	0.0390789
Amygdala	ANXA1, EMC2, LONP1, METTL3, TXN	0	0.0033	0	0.0223667
Amygdala	ANXA1, EMC2, LONP1, METTL3, SLC18A1	0.001	0.0061	0.0034375	0.0223667
Amygdala	ASB16, FTH1, HESX1, RBP4	0.0003	0.0001	0.0015	0.0055
Amygdala	NDUFAF6, OTX1, RGS20	0.0005	0.0035	0.00196429	0.0223667
Amygdala	CEP192, MYOC, PFN1, RPIA, TKT	0.0029	0.0114	0.00759524	0.0348333
Amygdala	CARM1, NDUFAF6, OTX1, RGS20, VASN	0.0002	0.0047	0.0015	0.0223667
Amygdala	AARS, ANXA1, EMC2, IARS, LONP1, METTL3, TIPRL	0.0001	0.0037	0.001375	0.0223667
Amygdala	CEP192, EMC2, FAM83H, LONP1, SYNE3	0.0005	0.0025	0.00196429	0.0223667
Amygdala	ANXA1, DYNLL1, EMC2, HMMR, LONP1, METTL3	0	0.004	0	0.0223667
Amygdala	ANXA1, CLNS1A, EMC2, LONP1, METTL3, NOS2, PSMD13	0.0002	0.0039	0.0015	0.0223667
Amygdala	ATPAF2, NME7, TSGA10, ZNF19, ZNF23	0.0009	0.0106	0.0033	0.0342941
Amygdala	ANXA1, EMC2, LONP1, METTL3	0.0003	0.005	0.0015	0.0223667
Amygdala	ANXA1, EMC2, LONP1, METTL3, PSMD13	0.0003	0.0054	0.0015	0.0223667
Anterior cingulate cortex BA24	CHPT1, FAM189A2, RMDN3, VEZT, YWHAZ	0.0025	0.0067	0.00819	0.0355765
Anterior cingulate cortex BA24	CAV2, MPRIP, NUPR1, PRPF4, SRGAP2	0	0.0004	0	0.0126
Anterior cingulate cortex BA24	AIMP1, NDUFAF4, TRAP1	0.0054	0.0092	0.0126	0.0355765
Anterior cingulate cortex BA24	HLA-DPA1, PTPRS, RMDN3, VEZT	0	0.0008	0	0.0126
Anterior cingulate cortex BA24	DIS3L, EXOSC6, FTSJ3, GRWD1, HIST1H1C, LIN9	0.0042	0.0082	0.011025	0.0355765
Anterior cingulate cortex BA24	BBS7, CCDC8, NDUFAF4, POLR2E, TRAP1, UVSSA	0.0016	0.012	0.0081	0.0378
Anterior cingulate cortex BA24	AIMP1, ANKRD36B, GAN, NDUFAF4, TRAP1	0.0017	0.0071	0.0081	0.0355765
Anterior cingulate cortex BA24	CEP135, CEP192, SFI1	0.0009	0.0021	0.0063	0.02646
Anterior cingulate cortex BA24	AEBP1, C2orf80, IFNAR1, PRKD2	0.0062	0.008	0.01395	0.0355765
Anterior cingulate cortex BA24	AIMP1, MRPS27, NDUFAF4, TRAP1	0.0026	0.0096	0.00819	0.0355765
Anterior cingulate cortex BA24	AIMP1, CYB561, DARS2, NDUFAF4, SLC39A2, TRAP1	0.0054	0.0123	0.0126	0.0378
Anterior cingulate cortex BA24	AIMP1, NDUFAF4, POLDIP2, RREB1, SPATA20, TRAP1	0.0013	0.003	0.00744545	0.027
Anterior cingulate cortex BA24	CAV2, EFR3A, NUPR1, PRPF4, SRGAP2	0.0001	0.0008	0.001575	0.0126
Anterior cingulate cortex BA24	AIMP1, GAN, KCTD5, NDUFAF4, TRAP1	0.002	0.0063	0.00819	0.0355765
Anterior cingulate cortex BA24	AIMP1, BBS7, C18orf8, CCDC8, NDUFAF4, POLR1A, TRAP1	0.0006	0.0029	0.0063	0.027
Anterior cingulate cortex BA24	AIMP1, GAN, NDUFAF4, SYNC, TRAP1	0.0024	0.0128	0.00819	0.0378
Anterior cingulate cortex BA24	BPHL, C18orf8, MTHFD1L, TIMM10, TIMM13	0.0018	0.0132	0.0081	0.0378
Anterior cingulate cortex BA24	AIMP1, BBS7, CCDC8, CSGALNACT2, NDUFAF4, TRAP1	0.0006	0.0045	0.0063	0.0315
Anterior cingulate cortex BA24	AIMP1, BBS7, CCDC8, CPSF4, NDUFAF4, TRAP1	0.0009	0.0112	0.0063	0.0378
Anterior cingulate cortex BA24	AIMP1, BBS7, CCDC8, NDUFAF4, TRAP1	0.0008	0.0044	0.0063	0.0315
Anterior cingulate cortex BA24	COG4, PEX14, RMDN3, SIRT6, TEKT4, VEZT	0.0001	0.0003	0.001575	0.0126
Anterior cingulate cortex BA24	AP1M1, CASP8, CORO7, GMEB1, ZNF19	0.018	0.0094	0.0281195	0.0355765
Caudate basal ganglia	CSGALNACT2, GOSR1, HMOX2, KCNJ6, NRAS, PACSIN2	0.0008	0.0079	0.00185263	0.017181
Caudate basal ganglia	CUL7, DDX42, RCC1, WDR1	0	0	0	0
Caudate basal ganglia	CUL7, ECT2, RCC1, TJP2, WDR1	0	0	0	0
Caudate basal ganglia	CPSF1, CUL7, HEMK1, INCA1, RCC1, SEC14L4, WDR1	0.0001	0.0002	0.000314286	0.00088
Caudate basal ganglia	CUL7, HEMK1, MTRF1L, RCC1, TRAP1, WDR1	0	0.0001	0	0.000488889
Caudate basal ganglia	ANO7, CUL7, RCC1, TRAP1, WDR1	0.0001	0.0004	0.000314286	0.0016
Caudate basal ganglia	NRAS, PACSIN2, RIC8A, SARNP	0.0025	0.0216	0.00392857	0.03168
Caudate basal ganglia	CUL7, PSMG4, RCC1, SIRT6, WDR1	0	0.0001	0	0.000488889
Caudate basal ganglia	ACTG1, CTNNB1, CUL7, RCC1, TJP2, WDR1	0	0	0	0
Caudate basal ganglia	GNPTAB, MAPK9, PICK1, PNO1	0.003	0.023	0.0044	0.0326452
Caudate basal ganglia	ACOT2, CUL7, MRPL28, MTIF3, RCC1, TRAP1, WDR1	0.0001	0.001	0.000314286	0.00338462
Caudate basal ganglia	FBXW11, MCM4, SPATA20, ZKSCAN1	0.011	0.025	0.0128526	0.0337333
Caudate basal ganglia	CHD1L, FTSJ3, NRAS, PACSIN2, TGOLN2	0.0006	0.0046	0.00146667	0.0119059
Caudate basal ganglia	FTSJ3, FYCO1, HIST1H1C, KIAA1841, MNDA, PRMT6	0.0019	0.0061	0.0030963	0.0149111
Caudate basal ganglia	CEP192, GIGYF1, LINC00839, SERHL2, TNRC6C	0	0.0015	0	0.0044
Caudate basal ganglia	FSD2, LASP1, OXER1, TJP2, ZBTB32, ZNF490	0.001	0.0046	0.00209524	0.0119059
Caudate basal ganglia	CUL7, RCC1, TRAP1, WDR1	0	0.0001	0	0.000488889
Caudate basal ganglia	FTSJ3, FYCO1, MNDA, PRMT6	0.0034	0.0086	0.00482581	0.0172
Caudate basal ganglia	CSGALNACT2, GOSR1, NRAS, PACSIN2, SNAP47	0.0001	0.0012	0.000314286	0.00377143
Caudate basal ganglia	C1orf109, GIGYF1, TNRC6C, TRIM73, YPEL3	0.0003	0.0093	0.00088	0.0177913
Caudate basal ganglia	ANO5, CUL7, DDX42, NUP50, RCC1, WDR1	0.0001	0.0001	0.000314286	0.000488889
Caudate basal ganglia	LASP1, LRRC47, OXER1, PNO1, TJP2	0.0015	0.0191	0.00264	0.0294345
Caudate basal ganglia	ADAMTS7, C2orf80, MCF2L, PRKD2	0.0172	0.0104	0.01892	0.018304
Caudate basal ganglia	EAF1, FGGY, GNPTAB, MAPK9, PICK1, PNO1	0.0009	0.0162	0.00198	0.0264
Caudate basal ganglia	CCDC154, EAF1, FGGY, GNPTAB, MAPK9, PICK1	0.0005	0.0075	0.00129412	0.017181
Caudate basal ganglia	CUL7, NOS2, PLEC, RAC2, RCC1	0	0	0	0
Caudate basal ganglia	ACTG1, FTSJ3, RIOK1, TXNL4A, ZGPAT	0.0012	0.001	0.00229565	0.00338462
Caudate basal ganglia	CSGALNACT2, GOSR1, NRAS, PACSIN2	0.0014	0.0194	0.00256667	0.0294345
Caudate basal ganglia	FSD2, GNPTAB, MAPK9, PICK1, PNO1, SPATC1L	0.0005	0.0099	0.00129412	0.01815
Caudate basal ganglia	ACTG1, CCDC8, CSGALNACT2, MCM4, PAWR	0.0011	0.0138	0.0022	0.0233538
Caudate basal ganglia	FA2H, KIAA1715, NRAS, PACSIN2, PGRMC2, TMEM41A	0.0017	0.0082	0.00287692	0.017181
Caudate basal ganglia	CCDC78, DPH7, HEMK1, INCA1, SEC14L4	0.0111	0.0253	0.0128526	0.0337333
Caudate basal ganglia	CUL7, DDX42, RCC1, USP40, WDR1	0.0001	0	0.000314286	0
Cerebellar Hemisphere	BPTF, BRD2, ITGA3, PWWP2A, RABIF	0.0031	0.0032	0.00983913	0.012045
Cerebellar Hemisphere	ABHD11, CPSF3L, INTS1, VAC14, ZNF720	0.0056	0.003	0.01387	0.012045
Cerebellar Hemisphere	ABCA3, CSGALNACT2, IPPK, MANEA, SLC29A1, UPK1A, ZDHHC18	0.0012	0.0023	0.005475	0.0111933
Cerebellar Hemisphere	ANO5, CTSZ, HSF2BP, KIF5B, NUP50, ZGPAT	0.0025	0.0041	0.00869048	0.0142524
Cerebellar Hemisphere	LHPP, SCAND1, SLC17A9, ZSCAN23	0.0021	0.013	0.00851667	0.0334793
Cerebellar Hemisphere	DARS2, NDUFAF4, NIPSNAP1, TRAP1	0.0001	0.0004	0.00243333	0.00417143
Cerebellar Hemisphere	DARS2, DLD, DNMT3B, NIPSNAP1, POLR2C, TRAP1	0.0003	0.0018	0.00312857	0.01095
Cerebellar Hemisphere	DARS2, NIPSNAP1, TRAP1	0.0008	0.0012	0.00449231	0.00796364
Cerebellar Hemisphere	KRT34, STMN3, TRIM73	0.0127	0.0161	0.0201543	0.0360706
Cerebellar Hemisphere	ABHD11, AMT, VAC14, ZNF720	0.007	0.0109	0.0154848	0.0306038
Cerebellar Hemisphere	CTSZ, ELP2, HSF2BP, KIF5B, PTPN21, ZGPAT	0.0004	0.0008	0.00331818	0.00584
Cerebellar Hemisphere	DRG2, HSPA14, NXT1, PAXIP1, PPHLN1, PRPSAP1	0.0009	0.003	0.00469286	0.012045
Cerebellar Hemisphere	ANO5, HSF2BP, KIF5B, NUP50, SCAND1, ZGPAT, ZSCAN18	0.0005	0.002	0.00331818	0.01095
Cerebellar Hemisphere	ARF6, DARS2, NDUFAF4, NIPSNAP1, SLC29A1, TRAP1	0	0.0001	0	0.00292
Cerebellar Hemisphere	AGPS, CEP192, DARS2, FTSJ3, MYO6, NIPSNAP1, TRAP1	0.0003	0.0005	0.00312857	0.0045625
Cerebellar Hemisphere	ANAPC4, C1orf127, CCT6B, CDC26, MTMR6, TTLL1	0.0082	0.0168	0.0171029	0.0360706
Cerebellar Hemisphere	BPTF, LIN52, PWWP2A	0.022	0.0235	0.0286786	0.0451103
Cerebellar Hemisphere	MAP2K3, MAP3K3, PPP2R4, USP8	0.0175	0.0164	0.0241038	0.0360706
Cerebellar Hemisphere	ABCA3, SLC29A1, UPK1A, ZDHHC18	0.0033	0.0094	0.0100375	0.0285917
Cerebellar Hemisphere	C4orf27, IFNGR2, KCNJ6, TMEM218	0.0005	0.0002	0.00331818	0.00292
Cerebellar Hemisphere	DARS2, KIF14, NSRP1, POLR2C	0.0021	0.0021	0.00851667	0.01095
Cerebellar Hemisphere	AGPAT4, CYB5A, DRG2, HSPA14	0.0053	0.0109	0.01387	0.0306038
Cerebellar Hemisphere	DTD1, MAP2K3, MAP3K3, PPP2R4	0.0111	0.0116	0.0197432	0.031363
Cerebellar Hemisphere	CCDC149, NDRG4, PRNP, PTGR2, SYNGR1	0.0011	0.0006	0.00535333	0.00486667
Cerebellar Hemisphere	C16orf59, FGL1, GTF2H2, SCAND1, ZNF232	0.0057	0.0182	0.01387	0.0377167
Cerebellar Hemisphere	ACADM, AP1M1, DARS2, MCUR1, NIPSNAP1, TIFA	0.0002	0.0002	0.00312857	0.00292
Cerebellar Hemisphere	ABCA3, GPC1, ITGA3, RPS25, SLC29A1, UPK1A, ZDHHC18	0	0.0002	0	0.00292
Cerebellar Hemisphere	FAM178A, NSMCE4A, SIRT6, SMC6	0.0067	0.0054	0.0152844	0.0179182
Cerebellar Hemisphere	CTSZ, ENKD1, HSF2BP, KIF5B, ZGPAT	0.0025	0.0167	0.00869048	0.0360706
Cerebellar Hemisphere	C4orf27, KCNJ6, TMEM218	0.0006	0	0.00365	0
Cerebellar Hemisphere	DCDC2, FAM118A, PTPRCAP	0.0145	0.0237	0.02117	0.0451103
Cerebellar Hemisphere	BLOC1S5, KRT34, OIP5, STMN3, TRIM73	0.0065	0.0094	0.0152844	0.0285917
Cerebellar Hemisphere	ABHD11, VAC14, ZNF720	0.0114	0.0262	0.0197432	0.0466488
Cerebellar Hemisphere	KRT34, STMN3, TRIM73, YPEL3	0.0139	0.0249	0.0207082	0.0454425
Cerebellar Hemisphere	GNG10, KRT34, STMN3, TRIM73	0.011	0.0133	0.0197432	0.0334793
Cerebellar Hemisphere	C4orf27, KCNJ6, SYT3, TMEM218	0.0003	0.0004	0.00312857	0.00417143
Cerebellar Hemisphere	CEP128, GTF2IRD1, NME7, TTLL5, ZNF23	0.0038	0.0186	0.011096	0.0377167
Cerebellar Hemisphere	CTSZ, ENKD1, HSF2BP, ZGPAT	0.0031	0.0148	0.00983913	0.0360133
Cerebellar Hemisphere	DNMT3B, PFKL, POLR2C	0.0085	0.0241	0.0172361	0.0451103
Cerebellar Hemisphere	BDKRB1, CERS1, HHATL	0.0023	0.0026	0.00869048	0.0118625
Cerebellar Hemisphere	CTSZ, HSF2BP, KIF5B, PTPN21, SCAND1, TRIP6, ZGPAT	0.0005	0.0033	0.00331818	0.012045
Cerebellum	BCL2L11, CYB561, GIMAP5, TMEM242	0.0174	0.0259	0.0227491	0.0387304
Cerebellum	C1orf109, DEPDC1B, GIGYF1, HSD17B14, SNRPC	0.002	0.0218	0.00453333	0.0352952
Cerebellum	GCN1L1, NPC1, POR, TMCO1	0.0014	0.0023	0.00366154	0.0102
Cerebellum	ACTR10, LNX2, NAGK, TIFA, ZNF410	0.0075	0.0259	0.0126286	0.0387304
Cerebellum	CAPZA2, FKBP15, FTSJ3, KIAA1033, MTFR1, MYO6	0.0057	0.004	0.0104757	0.0120308
Cerebellum	C18orf8, MCM4, POR, TMCO1	0.0016	0.0019	0.00402963	0.0102
Cerebellum	APPBP2, C1QTNF2, C1orf109, GNA15, KCNIP3, NPRL3, WDR59	0.0001	0.0001	0.0017	0.0034
Cerebellum	CHDH, COQ9, D2HGDH, NOS2, YBEY, YWHAE	0.0004	0.0032	0.00247273	0.0103619
Cerebellum	FGFR1, LTBR, NOS2, PLEC, YWHAE	0.0006	0.0046	0.00313846	0.0120308
Cerebellum	CEP192, FTSJ3, KRI1, MYO6	0.0086	0.0159	0.012713	0.0284526
Cerebellum	BMPR1A, FGFR1, IMMT, LTBR, MAP2K2, TDGF1	0.0065	0.0164	0.0113333	0.0285949
Cerebellum	FGFR1, INTS1, LTBR, PPP2R1B	0.0035	0.0262	0.007	0.0387304
Cerebellum	ALDH18A1, BPHL, COQ9, NOS2, PREX1, TIMM13, YWHAE	0.0003	0.0048	0.00247273	0.0120889
Cerebellum	CEP192, FTSJ3, LINC00839, MYO6, TAS1R3	0.0013	0.0016	0.003536	0.0102
Cerebellum	COG1, COG3, GUSBP3, QRICH1, SNRNP27, ZDHHC17	0.0004	0.0012	0.00247273	0.0102
Cerebellum	CHDH, COQ9, NOS2, YWHAE	0.0008	0.0042	0.003536	0.0120308
Cerebellum	AKT1, NOS2, SIRT6, YWHAE	0.0011	0.0024	0.003536	0.0102
Cerebellum	C1orf109, CCDC146, GPATCH2L, KRT40, ZNF286A	0.0037	0.0201	0.00717778	0.03417
Cerebellum	DNAJA3, NOS2, PRMT6, YWHAE	0.0013	0.0061	0.003536	0.0140387
Cerebellum	FBXO6, GCN1L1, NOS2, YWHAE	0.0013	0.0096	0.003536	0.0197818
Cerebellum	C1orf109, CCDC146, KRT40, TMEM241, ZNF286A	0.0019	0.0136	0.00445517	0.0272
Cerebellum	ALDH18A1, COQ9, NOS2, PREX1, YWHAE	0.0009	0.0045	0.003536	0.0120308
Cerebellum	FTSJ3, KRI1, MYO6	0.0132	0.0154	0.017952	0.0283027
Cerebellum	C18orf8, GAPVD1, MCM4, POR, TMCO1	0.0012	0.0022	0.003536	0.0102
Cerebellum	CCDC146, HIP1R, VPS28	0.0026	0.005	0.005525	0.0121429
Cerebellum	IFT52, IFT80, TTC30A, TTC30B	0.0091	0.0062	0.0128917	0.0140387
Cerebellum	FGFR1, LTBR, PARP12, RNF114	0.0003	0.0011	0.00247273	0.0102
Cerebellum	CDK6, LPIN1, NOS2, PPL, YWHAE, ZSCAN1	0.0001	0.0012	0.0017	0.0102
Cerebellum	ACOT2, ENDOG, SCO1, TRAP1	0.0038	0.0093	0.00717778	0.0197625
Cerebellum	C1orf109, CPSF3L, GIGYF1, HSD17B14, INTS1, SNRPC	0.0005	0.0014	0.00283333	0.0102
Cerebellum	FGFR1, LTBR, RAB1A, TMCO1	0.0011	0.0021	0.003536	0.0102
Cerebellum	C1orf109, CCDC146, KRT40, ZNF286A, ZNF410	0.003	0.0212	0.00618182	0.035161
Cerebellum	APPBP2, C1QTNF2, C1orf109, GNA15, KCNIP3	0.0003	0	0.00247273	0
Cerebellum	BDKRB1, CERS1, HHATL	0.0064	0.0043	0.0113333	0.0120308
Cerebellum	NEK1, NOS2, YWHAE, YWHAH	0.0008	0.0031	0.003536	0.0103619
Cerebellum	CC2D1B, LINC00839, TAS1R3	0.0022	0.0026	0.00482581	0.0103619
Cerebellum	ABHD4, IGFBP5, SLC41A3	0.0011	0.003	0.003536	0.0103619
Cerebellum	DHX8, FTSJ3, KRI1, MYO6, THRAP3	0.0212	0.0262	0.0252912	0.0387304
Cerebellum	ATP6V0A1, CYTH2, GCN1L1, NPC1, POR, SMPD3	0.0004	0.0003	0.00247273	0.0068
Cerebellum	GNPTAB, NOS2, PLEC, SAP18, THRAP3, YWHAE	0.0019	0.015	0.00445517	0.0283027
Cerebellum	ALDH18A1, COQ9, CYTH2, GNAQ, NOS2, NT5C3A, PREX1, YWHAE	0.0001	0.0004	0.0017	0.0068
Cerebellum	ACOT2, TRAP1, UQCRFS1	0.0086	0.0146	0.012713	0.0283027
Cerebellum	COQ9, NOS2, YWHAE	0.0012	0.0031	0.003536	0.0103619
Cerebellum	COQ9, NDUFAF4, NOS2, YWHAE	0.0004	0.0017	0.00247273	0.0102
Cerebellum	KCNIP3, PCDHB5, PTP4A2, TARBP2	0.0078	0.0288	0.0126286	0.0416681
Cerebellum	CDK6, LPIN1, MET, NOS2, SH2B2, YWHAE	0.001	0.0064	0.003536	0.0140387
Cerebellum	AKT1, NOS2, PPL, SIRT6, YWHAE	0.0001	0.0012	0.0017	0.0102
Cortex	AKTIP, ANKRD36B, SYCE1, TXN, TXN2, VPS16	0.0009	0.0008	0.0078	0.0108
Cortex	C1orf109, GIGYF1, POU6F2, TRIM73, ZNF20	0.0004	0.0045	0.00648	0.02025
Cortex	ATXN2, FTSJ3, WWP2	0.0012	0.0027	0.0078	0.01782
Cortex	ATXN2, FTSJ3, MAP1LC3A, TBC1D2, TBC1D7, WWP2, YWHAE	0.0003	0.0008	0.00648	0.0108
Cortex	LTBR, TRAF1, ZNF20, ZNF697	0.0006	0.002	0.00648	0.0154286
Cortex	AKTIP, DMXL2, VPS16	0.0029	0.01	0.01044	0.0385714
Cortex	HNF4A, KIAA0232, MAPK3, SIRT6	0.0048	0.0134	0.01404	0.0425647
Cortex	ACOT2, C21orf33, COQ9, NDUFAF4, TAMM41	0.0037	0.0098	0.0124875	0.0385714
Cortex	ATXN2, BOLA2, FTSJ3, GNMT, WDYHV1, WWP2	0.0004	0.0013	0.00648	0.0117
Cortex	HAP1, SYCE1, ZNF124, ZNF20	0.0016	0.003	0.00785455	0.01782
Cortex	C17orf75, CORO7, DKKL1, PEX6, STYX, THBS1, THBS3	0.0106	0.0162	0.02196	0.0486
Cortex	AKTIP, EIF3E, FTSJ3, VPS16, WWP2	0.0005	0.0011	0.00648	0.0117
Cortex	ACOT2, C21orf33, NDUFAF4, TRAP1, UQCRFS1	0.0026	0.0033	0.0100286	0.01782
Cortex	ACOT2, ALDH2, C21orf33, HEMK1, MTRF1L, NDUFAF4	0.0025	0.0109	0.0100286	0.03924
Cortex	AKTIP, TAGLN3, TXN, VPS16	0.0013	0.0006	0.0078	0.0108
Cortex	ACOT2, C21orf33, DUSP19, NDUFAF4	0.0013	0.0004	0.0078	0.0108
Cortex	C17orf75, DKKL1, PEX6, STYX, THBS1, THBS3, TTLL5	0.0118	0.0132	0.02196	0.0425647
Cortex	FTSJ3, WDR55, WWP2	0.0016	0.0038	0.00785455	0.0186545
Frontal Cortex BA9	GDPD3, NPPA, TGM1	0.0114	0.0133	0.0183955	0.0304613
Frontal Cortex BA9	ARPC5L, DYRK1A, HIST2H2AC, NUP50, RNF169	0.0009	0.0056	0.00336316	0.017287
Frontal Cortex BA9	CBR1, CD40, CYB561, SCN3B, STX6, TMEM128	0.0003	0.0021	0.001775	0.00994
Frontal Cortex BA9	ARPC5L, DYRK1A, HIST2H2AC, RNF169, S100A10	0.0001	0.0005	0.0008875	0.0044375
Frontal Cortex BA9	DCAF5, LOXL4, PRMT6, RWDD2B, SOST	0.0141	0.0035	0.0213	0.0130789
Frontal Cortex BA9	C19orf44, CCDC57, NUP50, PHLDB3, TFPT, TSEN15, ZMAT2	0.0036	0.0204	0.00852	0.0426
Frontal Cortex BA9	CBR1, CD40, CYB561, MARCH2, SCN3B, TMEM128	0.0005	0.0021	0.00253571	0.00994
Frontal Cortex BA9	C19orf44, CCDC57, NUP50, TSEN15, ZC2HC1C, ZMAT2	0.001	0.0021	0.00338095	0.00994
Frontal Cortex BA9	CEP192, FBF1, RNPS1, SIRT6, TADA2A, TBC1D26, UBR5	0.0004	0.0015	0.00218462	0.008875
Frontal Cortex BA9	ARPC5L, DYRK1A, PHF5A, S100A10, SF3B2, TIMM13	0.0001	0.0048	0.0008875	0.01704
Frontal Cortex BA9	ARHGEF19, ARPC5L, DYRK1A, FUBP3, NUP50, RNF169	0.0002	0.0005	0.00142	0.0044375
Frontal Cortex BA9	ARPC5L, DYRK1A, FUBP3, NUP50, RBM6, RNF169	0.0001	0.0002	0.0008875	0.00426
Frontal Cortex BA9	CD40, CLDN9, CYB561, SCN3B, TMEM128	0.0039	0.016	0.00893226	0.0348545
Frontal Cortex BA9	MCFD2, NDUFB2, PFKM, PSMD13, PSMD4, UBXN6	0.0009	0.0079	0.00336316	0.0200321
Frontal Cortex BA9	HIST2H2AC, HLA-B, HLA-G, MOGS, RNF123, SGSM3	0.0029	0.0236	0.00791923	0.0465444
Frontal Cortex BA9	BTG1, PRMT1, RNPS1, SIRT6, TBC1D26, UBR5	0.0006	0.0034	0.00284	0.0130789
Frontal Cortex BA9	ARPC5L, DYRK1A, ITPR1, NUP50, PLEC, PRKG1, RNF169	0.0017	0.0105	0.00524783	0.0257069
Frontal Cortex BA9	NF2, RIBC2, RPL18A, RPL36AL, SGSM3, SUV420H2	0	0	0	0
Frontal Cortex BA9	HLA-B, HLA-G, SGSM3	0.0025	0.0071	0.0071	0.0189333
Frontal Cortex BA9	ARPC5L, CCDC8, CSGALNACT2, DYRK1A, SIRT6, UBR5	0.0001	0.0006	0.0008875	0.00473333
Frontal Cortex BA9	ARPC5L, DYRK1A, NUP50, RNF169, TSEN15, ZMAT2	0.0003	0.0008	0.001775	0.00568
Frontal Cortex BA9	ARPC5L, DYRK1A, NUP50, RNF169, S100A10, TTLL13	0.0001	0.0003	0.0008875	0.00426
Frontal Cortex BA9	CD40, INTS1, POLR2E, POLR2H, POLR3H, PPP2R1B, ZNF114	0.0055	0.0227	0.0108472	0.0460486
Frontal Cortex BA9	ARPC5L, DYRK1A, PHF5A, S100A10, TTLL13	0	0.0005	0	0.0044375
Frontal Cortex BA9	COQ9, SIRT6, TARS2, UBR5	0.0008	0.0035	0.00334118	0.0130789
Frontal Cortex BA9	ARPC5L, DYRK1A, S100A10, TTLL13	0	0.0002	0	0.00426
Frontal Cortex BA9	BPHL, RNPS1, SIRT6, TBC1D26, TIMM13, UBR5	0.0018	0.0068	0.005325	0.0189333
Frontal Cortex BA9	RNPS1, SIRT6, TBC1D26, TIMM13, UBR5	0.001	0.0059	0.00338095	0.0174542
Frontal Cortex BA9	C1orf109, FUBP3, GIGYF1, NUPL2, STMN3, TADA2A	0.0035	0.0054	0.00852	0.017287
Frontal Cortex BA9	ACAT1, ARPC5L, CD274, DYRK1A, MOGS, S100A10	0.0008	0.0027	0.00334118	0.0119813
Frontal Cortex BA9	HLA-DRB5, HSPA5, POLR2E, POLR3H, TIMM13, VSIG8	0.0031	0.0162	0.00815185	0.0348545
Frontal Cortex BA9	LOXL4, PRMT6, SOST	0.0303	0.0072	0.0384161	0.0189333
Frontal Cortex BA9	NF2, RIBC2, RPL18A, SGSM3	0.0013	0.0013	0.00419545	0.00839091
Frontal Cortex BA9	HLA-B, PRMT6, SGSM3, WDFY3	0.0041	0.0053	0.00909688	0.017287
Frontal Cortex BA9	ACAT1, ARPC5L, DYRK1A, S100A10, TTLL13	0.0002	0.0003	0.00142	0.00426
Frontal Cortex BA9	CD3EAP, CEP192, FUBP3, POLR2E, POLR3H, ZBTB10	0.0059	0.0124	0.0110237	0.0293467
Hippocampus	AES, HNRNPAB, INO80E	0.003	0.0035	0.0128	0.0327111
Hippocampus	ACOT2, CCDC109B, GFM2, MAPK3, SNRNP27, TRAP1	0.0005	0.0046	0.00533333	0.0327111
Hippocampus	AES, BOLA2, CCDC36, INO80E, MYO15B, SPATC1L	0.0011	0.0033	0.00832	0.0327111
Hippocampus	AES, BPHL, INO80E, SNRPA, TIMM10, TIMM13	0.0005	0.0084	0.00533333	0.0379733
Hippocampus	HIST2H2AC, KCTD15, MTUS1, SMC2, TUBA1A	0.0081	0.0125	0.0199385	0.05
Hippocampus	HSPB2, MYBPC3, RPL36AL, TNNI3K	0.0003	0.0002	0.00533333	0.0128
Hippocampus	COPA, HIST2H2AC, PPM1G, USP49	0.0041	0.0077	0.0145778	0.0379733
Hippocampus	AES, INO80E, LTBR, TRAF1, TRIM4	0.0005	0.0036	0.00533333	0.0327111
Hippocampus	AES, BOLA2, CCDC36, INO80E, MYO15B	0.0016	0.0043	0.00930909	0.0327111
Hippocampus	AES, DEPTOR, INO80E, LTBR, TRAF1, TRIM4	0.0005	0.0085	0.00533333	0.0379733
Hippocampus	MAP1LC3A, TBC1D2, TBC1D7	0.0007	0.0029	0.0064	0.0327111
Hippocampus	AP1M1, CORO7, RP9	0.0149	0.0034	0.0272457	0.0327111
Hippocampus	AES, CEP89, GCC1, INO80E, KIAA0753, MTHFD2	0.0019	0.0089	0.0101333	0.0379733
Hippocampus	ACOT1, CCDC109B, GFM2, MAPK3, SNRNP27, TRAP1	0.0002	0.0079	0.00533333	0.0379733
Hippocampus	AES, BOLA2, CCDC36, INO80E, MYO15B, ZBTB32	0.0012	0.0041	0.00832	0.0327111
Hippocampus	GFM2, MAPK3, MRPL19, PRKCZ, SNRNP27, TRAP1	0.0024	0.0074	0.0114286	0.0379733
Hypothalamus	B9D1, CHCHD6, INVS	0.0081	0.0124	0.01826	0.0292286
Hypothalamus	FTSJ3, GNL3, GRWD1, HIST1H1C, HIST1H2AG	0.0015	0.0015	0.011	0.0223667
Hypothalamus	FTSJ3, GNL3, HIST1H1C, KIF12, LMNA	0.0027	0.0059	0.011	0.0223667
Hypothalamus	NOS2, PSMC5, PSME3, SALL2	0.0047	0.0094	0.0119308	0.0238615
Hypothalamus	FTSJ3, GNL3, HIST1H1C	0.003	0.0048	0.011	0.0223667
Hypothalamus	DHRS7, PCNP, PTPN1, WDR41	0.0043	0.0044	0.011825	0.0223667
Hypothalamus	ANO7, MRPL22, NDUFA6, SLC30A9, TFAM, TRAP1	0.0038	0.0071	0.011825	0.0225
Hypothalamus	FTSJ3, GNL3, GRWD1, HIST1H1C, HIST1H2AG, IQGAP1, PTGR2	0.0025	0.0025	0.011	0.0223667
Hypothalamus	FTSJ3, GRWD1, HIST1H1C, HIST1H2AG, MARS, OXER1	0.003	0.0041	0.011	0.0223667
Hypothalamus	AUP1, CCDC167, OPRM1, PCNP, PTPN1, TNPO3, WDR41	0.003	0.0045	0.011	0.0223667
Hypothalamus	PCNP, PTPN1, WDR41	0.0043	0.0075	0.011825	0.0225
Hypothalamus	CEP192, CNTRL, FTSJ3, GNL3, HIST1H1C	0.0022	0.0083	0.011	0.022825
Hypothalamus	FTSJ3, GNL3, GRWD1, HIST1H1C, HIST1H2AG, MRPL22, RPL12	0.0025	0.0025	0.011	0.0223667
Hypothalamus	ANO7, CISD3, MRPL22, SLC30A9, TRAP1	0.003	0.0061	0.011	0.0223667
Putamen basal ganglia	C10orf2, COQ9, NDUFAF4, TFAM	0.0025	0.0064	0.0126	0.0261
Putamen basal ganglia	POLR2E, SMG7, UVSSA	0.0081	0.011	0.0158478	0.0291176
Putamen basal ganglia	CDC42EP4, DSC2, HRAS, PPFIBP2, STX6, UHRF1BP1	0.0035	0.0087	0.0126	0.0261
Putamen basal ganglia	HEATR1, HLA-B, HLA-H	0.0019	0.0192	0.0126	0.0432
Putamen basal ganglia	FN1, NOV, SLC2A9, TKT	0.0012	0.0006	0.0126	0.0261
Putamen basal ganglia	NMNAT1, PICK1, TBC1D7, ZSCAN23	0.0056	0.0224	0.0132632	0.048
Putamen basal ganglia	FN1, FYCO1, RPA2, WDHD1	0.0097	0.0072	0.0181875	0.0261
Putamen basal ganglia	CDC42EP4, CDH1, DAAM1, PAK6, POLR2E	0.007	0.0073	0.015	0.0261
Putamen basal ganglia	C10orf2, CDC42EP4, COQ9, HRAS, NDUFAF4, TFAM	0.0008	0.0045	0.0126	0.0261
Putamen basal ganglia	C5orf45, EFHC1, NMNAT1, PICK1, TBC1D7	0.0026	0.0084	0.0126	0.0261
Putamen basal ganglia	CDC42EP4, HRAS, PAK6, PPFIBP2, RAB5A, UHRF1BP1	0.0062	0.0147	0.01395	0.0348158
Putamen basal ganglia	NMNAT1, PICK1, TBC1D7	0.005	0.0142	0.0132632	0.0348158
Putamen basal ganglia	C10orf2, CIAO1, COQ9, FN1, NDUFAF4, RAE1, RGS2, TFAM, WDR75	0.0001	0.0022	0.0045	0.0261
Putamen basal ganglia	ADHFE1, CDC42EP4, GNAQ, HRAS, PPFIBP2, RGS2	0.0024	0.0069	0.0126	0.0261
Putamen basal ganglia	GRAP2, LTBR, TRAF1	0.001	0.0027	0.0126	0.0261
Putamen basal ganglia	BOD1L1, POLR2E, TRIM29, ZBTB38	0.0035	0.0068	0.0126	0.0261
Putamen basal ganglia	FTSJ3, KNOP1, PRPF38B	0.0056	0.0084	0.0132632	0.0261
Putamen basal ganglia	C19orf44, CCDC57, POLR2E, SFI1, TRIM29, ZBTB38	0.0074	0.008	0.0151364	0.0261
Putamen basal ganglia	ENAH, FYCO1, PRMT6, SMG7	0.0042	0.0075	0.0126	0.0261
Putamen basal ganglia	C10orf2, COQ9, MTRF1L, NDUFAF4	0.0038	0.011	0.0126	0.0291176
Putamen basal ganglia	C10orf2, COQ9, NDUFAF4, TSFM	0.0032	0.0086	0.0126	0.0261
Spinal cord cervical c-1	CFTR, HIST1H3A, KAT7, SP110, YWHAG	0.0005	0.0016	0.008	0.0256
Spinal cord cervical c-1	CFTR, HIST1H3A, JMJD6, RSRC1, YWHAG	0.0003	0	0.008	0
Substantia nigra	CMTR2, FBXO7, GRWD1, PPP2R1B, PRAME, RPN1	0	0.0002	0	0.0034
Substantia nigra	GRWD1, MRPL20, RBM28, RPL13	0.0008	0.0016	0.00534286	0.00906667
Substantia nigra	GRWD1, MSH6, MUTYH, RBM28, RPL13, SPDL1	0.0044	0.0072	0.0111714	0.0196714
Substantia nigra	LAMA3, PTPRK, PXDN, ZNF3	0.0309	0.0081	0.042024	0.0196714
Substantia nigra	GRWD1, PPP2R1B, RBM28, RPN1, RRP15	0.0008	0.0006	0.00534286	0.0068
Substantia nigra	GRWD1, HADHA, NDUFA4, NDUFA6, PPP2R1B, RBM28, RPN1	0.0022	0.0079	0.00831111	0.0196714
Substantia nigra	CDKN2AIPNL, MGAT5B, MOBP, TENC1, WAC	0.0181	0.0223	0.03077	0.0421222
Substantia nigra	CYB561, ELOVL4, SERF1A, SERF1B, TM2D3, TMEM128	0.0082	0.0201	0.017425	0.0421222
Substantia nigra	GRWD1, MTMR14, PPP2R1B, RBM28, RPN1, SFXN4	0.0033	0.0029	0.00963333	0.012325
Substantia nigra	CDCA5, DOCK5, STK38	0.0294	0.0211	0.04165	0.0421222
Substantia nigra	GRWD1, PPP2R1B, RBM28, RPL13, RPN1	0.001	0.0011	0.00534286	0.00748
Substantia nigra	DDX51, GRWD1, PPP2R1B, RBM28, RPN1	0.0014	0.0024	0.00595	0.0116571
Substantia nigra	ABCC6, AKAP2, EZR, GRWD1, HADHA, RBM28	0.0029	0.0048	0.00963333	0.01632
Substantia nigra	GRWD1, PPP2R1B, RBM28, RPN1	0.0011	0.0011	0.00534286	0.00748
Substantia nigra	GRWD1, PPP2R1B, RPN1	0.0046	0.0043	0.0111714	0.0162444
Substantia nigra	C3, GNMT, PLEKHF2, TGM2	0.0065	0.0166	0.0147333	0.0376267
Substantia nigra	BRMS1L, CD3EAP, CHAF1A, POLR2E, PRPF6	0.0004	0.0001	0.00534286	0.0034
Substantia nigra	CCT3, GRWD1, NOS2, PPFIA1, PSMD13	0.0008	0.006	0.00534286	0.0185455
Nucleus accumbens basal ganglia	MRPL19, MRPL34, MRPL50, NDUFAF4, TRAP1	0.0031	0.0022	0.00950625	0.0121875
Nucleus accumbens basal ganglia	C1orf86, GNMT, GTF2H2, GTF2H5, INCA1, NIF3L1, UBXN2B	0.0013	0.0041	0.00950625	0.0121875
Nucleus accumbens basal ganglia	C1orf86, FHL2, GTF2H2, GTF2H5, INCA1	0.0007	0.0018	0.00950625	0.0117
Nucleus accumbens basal ganglia	IRS1, ITK, KHDRBS1, NMI, NSUN6, TRIM72	0.0069	0.0065	0.010764	0.0144857
Nucleus accumbens basal ganglia	CSGALNACT2, FAM213A, HLA-C, HLA-F, HLA-H	0.0042	0.0317	0.00953333	0.0456655
Nucleus accumbens basal ganglia	EHMT2, FBXO38, HLTF, MYOM2, TOP3A, ZBTB38	0.0052	0.0145	0.0104	0.028275
Nucleus accumbens basal ganglia	ACKR3, ESPL1, FBXO7, UXS1, ZKSCAN8	0.0066	0.0299	0.010764	0.0456655
Nucleus accumbens basal ganglia	ARNT, CYB561, PNPLA2, RTN4, SMAD9, SNX2, TMEM128	0.0037	0.0041	0.00950625	0.0121875
Nucleus accumbens basal ganglia	GTF2H2, GTF2H5, INCA1, IVNS1ABP, UNK, UPF1	0.0001	0.0002	0.0078	0.0052
Nucleus accumbens basal ganglia	MRPL34, MRPL50, NOS2, PSMD13, PSMD4, SLC25A3	0.0029	0.004	0.00950625	0.0121875
Nucleus accumbens basal ganglia	MRPL34, MRPL50, MTRF1L, NDUFAF4, TRAP1	0.0016	0.0014	0.00950625	0.0117
Nucleus accumbens basal ganglia	HLTF, MSH6, POLR2D, POLR2E, SUPT5H, ZBTB38	0.0035	0.0063	0.00950625	0.0144529
Nucleus accumbens basal ganglia	NOL8, NUP50, POLR2D, POLR2E, SUPT5H	0.0104	0.0322	0.0144857	0.0456655
Nucleus accumbens basal ganglia	METTL15, MRPL34, MRPL50, NDUFAF4, TRAP1	0.0027	0.0025	0.00950625	0.0121875
Nucleus accumbens basal ganglia	C1orf86, GTF2H2, GTF2H5, HAUS1, INCA1, SSC5D	0.0015	0.005	0.00950625	0.0121875
Nucleus accumbens basal ganglia	IRS1, KHDRBS1, NMI, PSMG3, TRIM72	0.0018	0.0006	0.00950625	0.0117
Nucleus accumbens basal ganglia	CCT3, IVNS1ABP, MRPL34, MRPL50, SLC25A3, UPF1	0.0032	0.0034	0.00950625	0.0121875
Nucleus accumbens basal ganglia	CSGALNACT2, FAM213A, HIATL1, IVNS1ABP, UNK, UPF1	0.0032	0.0024	0.00950625	0.0121875
Nucleus accumbens basal ganglia	ACSF2, NDUFAF4, PITRM1, TRAP1	0.0024	0.002	0.00950625	0.012
Nucleus accumbens basal ganglia	CHRNA3, CSGALNACT2, FAM20B, FAM213A, TPST2	0.0118	0.0293	0.0161474	0.0456655
Nucleus accumbens basal ganglia	CDH1, POLR2D, POLR2E, SNX2, SUPT5H	0.0025	0.0045	0.00950625	0.0121875
Nucleus accumbens basal ganglia	LRRK2, SERF1A, TIMM10, TIMM13	0.0044	0.0038	0.00953333	0.0121875
Nucleus accumbens basal ganglia	BTN2A2, HLA-DRB1, HLA-DRB5	0.0035	0.0189	0.00950625	0.0342837
Nucleus accumbens basal ganglia	EHMT2, HLTF, MSH6, MYOM2, POLR2D, SUPT5H, ZBTB38	0.0015	0.0038	0.00950625	0.0121875
Nucleus accumbens basal ganglia	CYB561, RTN4, SNX2, TMEM128	0.0053	0.0061	0.0104	0.0144182
Nucleus accumbens basal ganglia	IFIT1, IFIT5, IVNS1ABP, SNRPF, TXNL4A, UNK, UPF1	0.0038	0.0016	0.00950625	0.0117
Nucleus accumbens basal ganglia	IVNS1ABP, LGALS9, NCR3LG1, UPF1	0.0058	0.0079	0.0104	0.0171167
Nucleus accumbens basal ganglia	FBXO25, MSH6, POLR2D, POLR2E, PSMD4, SUPT5H	0.006	0.0228	0.0104	0.0378383
Nucleus accumbens basal ganglia	DCDC2, FAM118A, NMU	0.0058	0.0137	0.0104	0.0274
Nucleus accumbens basal ganglia	FBXO7, MRPL34, MRPL50, SLC25A3, UXS1, ZKSCAN8	0.0013	0.0017	0.00950625	0.0117
Nucleus accumbens basal ganglia	KCNN4, MRPL34, MRPL50, RAB7A, SLC25A3, UBAC2	0.0032	0.0015	0.00950625	0.0117
Nucleus accumbens basal ganglia	MRPL34, MRPL50, NOS2, PEX5, PEX6, PSMD13, PSMD4, SLC25A3	0.0028	0.005	0.00950625	0.0121875
Nucleus accumbens basal ganglia	CDK3, HSPA4, MRPL34, MRPL50, NOS2, PSMD13, PSMD4, SLC25A3	0.0085	0.0133	0.0122778	0.0273
Nucleus accumbens basal ganglia	IVNS1ABP, LRRK2, PEBP1, SERF1A	0.0041	0.0031	0.00953333	0.0121875
Nucleus accumbens basal ganglia	FTSJ3, GTF2H2, HIST1H1C, NCR3LG1, TNF	0.0044	0.0166	0.00953333	0.0315805
Nucleus accumbens basal ganglia	C4orf32, CYB561, RTN4, SNX2, TMEM128	0.0055	0.0041	0.0104	0.0121875
Nucleus accumbens basal ganglia	LTBR, SSC5D, TRAF1	0.0069	0.0312	0.010764	0.0456655
Nucleus accumbens basal ganglia	BAG6, IQCG, MRPL34, MRPL50, NOS2, PSMD13, PSMD4, SLC25A3	0.0038	0.0046	0.00950625	0.0121875
Nucleus accumbens basal ganglia	IRS1, ITK, KHDRBS1, NMI, PSMG3, TRIM72	0.0022	0.0002	0.00950625	0.0052
Nucleus accumbens basal ganglia	HLA-B, HLA-H, UXS1	0.0054	0.0205	0.0104	0.0363409
Nucleus accumbens basal ganglia	CCDC8, NDUFAF4, POLR2D, POLR2E, SNX2, TRAP1	0.0006	0.0011	0.00950625	0.0117
Nucleus accumbens basal ganglia	APC2, CTNNB1, PSMD4, RTN4, SNX2, TMEM128	0.0007	0.0008	0.00950625	0.0117
Nucleus accumbens basal ganglia	ALDH7A1, NDUFAF4, PGD, TRAP1, XRCC4	0.0071	0.0307	0.0108588	0.0456655
Nucleus accumbens basal ganglia	CBR1, IFIT1, IFIT5, SNRPF, TXNL4A	0.039	0.0306	0.0468	0.0456655
Nucleus accumbens basal ganglia	POLR2D, POLR2E, SUPT5H	0.0066	0.0214	0.010764	0.0369652
Nucleus accumbens basal ganglia	C1orf86, GTF2H2, GTF2H5, INCA1	0.0019	0.004	0.00950625	0.0121875
Nucleus accumbens basal ganglia	MSH6, POLR2D, POLR2E, SUPT5H	0.0078	0.0218	0.0117	0.0369652
Nucleus accumbens basal ganglia	CYB561, LRCH4, RTN4, SNX2, TMEM128	0.0039	0.003	0.00950625	0.0121875
Nucleus accumbens basal ganglia	MRPL34, MRPL50, MTRF1L, NDUFAF4, SLC25A3	0.0015	0.0011	0.00950625	0.0117
Nucleus accumbens basal ganglia	C1orf86, GTF2H2, GTF2H5, INCA1, LRP2BP	0.0021	0.005	0.00950625	0.0121875
Nucleus accumbens basal ganglia	C1orf86, CDC42BPB, GTF2H2, GTF2H5, INCA1, UBXN2B	0.0002	0.0002	0.0078	0.0052
Nucleus accumbens basal ganglia	IFIT1, PAF1, PCCA, POLR2D, POLR2E, SUPT5H	0.008	0.0279	0.0117736	0.0453375
Nucleus accumbens basal ganglia	COG4, IVNS1ABP, PSMD4, RPS20, UPF1	0.0021	0.0049	0.00950625	0.0121875
Nucleus accumbens basal ganglia	NDUFAF4, PGD, TRAP1	0.0059	0.0175	0.0104	0.0325
Nucleus accumbens basal ganglia	NDUFAF4, NXF1, POLR2D, SUPT5H, TRAP1	0.0033	0.0096	0.00950625	0.0202378

## Sheet: Hispanic
Tissue	Gene Modules for Hispanic population	Raw p-value in Hispanic population	Raw p-value in White population	FDR Adjusted p-value in Hispanic population	FDR Adjusted p-value in White population
Amygdala	SELV, TLE4, ZMYND19	0.0166	0.0403	0.0328048	0.0464569
Amygdala	CPNE8, EMC2, LONP1, NDUFAF4, NDUFS1	0.0047	0.0055	0.0328048	0.0106163
Amygdala	ANXA1, DGUOK, METTL3, MGMT	0.014	0.0016	0.0328048	0.009545
Amygdala	LACTB, LONP1, NDUFAF4, UBXN2B, USP30	0.0137	0.0012	0.0328048	0.009545
Amygdala	DYNLL1, METTL3, PSMD13	0.0096	0.0089	0.0328048	0.0136796
Amygdala	D2HGDH, MITD1, TIMM10, TIMM13, YBEY, ZNF655	0.0083	0.0114	0.0328048	0.0152613
Amygdala	DYNLL1, METTL3, NME7, PCM1	0.0212	0.0045	0.03735	0.009545
Amygdala	LACTB, LONP1, MARC1, NDUFAF4, RAB6C, USP30	0.0149	0.0009	0.0328048	0.009545
Amygdala	CARS2, EMC2, LONP1, NDUFAF4	0.0199	0.0027	0.036087	0.009545
Amygdala	ATPAF2, MITD1, TIMM10, TIMM13, YBEY, ZNF655	0.0156	0.0033	0.0328048	0.009545
Amygdala	ARFGAP2, MYOC, PEAK1, PFN1, TKT	0.0216	0.0041	0.03735	0.009545
Amygdala	ANO5, NUP50, RNGTT, WDR43	0.0109	0.008	0.0328048	0.0131824
Amygdala	DYNLL1, HMMR, METTL3	0.0097	0.0095	0.0328048	0.0140804
Amygdala	CORO2A, DVL2, IQGAP1, NR1H2, PTGR2	0.0071	0	0.0328048	0
Amygdala	NME7, TSGA10, ZNF23	0.0113	0.0267	0.0328048	0.0325897
Amygdala	ABHD11, ALDH16A1, ANXA1, FAS, METTL3, MGMT	0.0133	0.0036	0.0328048	0.009545
Amygdala	NDUFAF6, OTX1, RGS20	0.0082	0.0035	0.0328048	0.009545
Amygdala	ANXA1, FAHD1, METTL3, MGMT	0.0159	0.0031	0.0328048	0.009545
Amygdala	MITD1, NARS2, TIMM10, TIMM13, YBEY, ZNF655	0.0157	0.0043	0.0328048	0.009545
Amygdala	CPOX, PLGRKT, USP30	0.02	0.0225	0.036087	0.0282955
Amygdala	ATPAF2, MITD1, RPIA, TIMM10, TKT, ZNF655	0.0149	0.0009	0.0328048	0.009545
Amygdala	BHMT, HESX1, LAMTOR5, RBP4	0.0253	0.0015	0.041998	0.009545
Amygdala	C11orf54, C4orf33, MYOC, PBLD, TKT, VAC14	0.0174	0.0084	0.0328227	0.0134077
Amygdala	C4A, DYNLL1, METTL3	0.0121	0.0106	0.0328048	0.014423
Amygdala	MDFI, NDUFAF6, NR1H2, OTX1, RGS20	0.0059	0.0039	0.0328048	0.009545
Amygdala	MITD1, TIMM10, TIMM13, VILL, YBEY, ZNF655	0.0146	0.0105	0.0328048	0.014423
Amygdala	ATPAF2, MYOC, RPIA, TKT, TRIM32, VPS11, VPS8	0.0341	0.0064	0.0487983	0.0113021
Amygdala	ARFGAP2, CEP192, MYOC, PFN1, TKT	0.0141	0.0092	0.0328048	0.0138836
Amygdala	EMC2, HLA-C, HLA-G, LONP1, NDUFAF4	0.015	0.0134	0.0328048	0.0173781
Amygdala	NDUFAF6, OTX1, RGS20, RPL17, RPL9, VASN	0.0117	0.003	0.0328048	0.009545
Amygdala	DVL2, EPB41L4A, EPHA2	0.0031	0.0002	0.0328048	0.0083
Amygdala	ACVR1B, BAG6, DYNLL1, METTL3, NR1H2	0.0165	0.0087	0.0328048	0.0136245
Amygdala	ATP6V1H, DCLRE1C, RBM12, SPATA20, USP47	0.034	0.0388	0.0487983	0.0453577
Amygdala	ATPAF2, MYOC, PGM2, RPIA, TKT	0.0282	0.0019	0.0450115	0.009545
Amygdala	EMC2, LONP1, NDUFAF4, TBRG4, TRMT11	0.0103	0.0066	0.0328048	0.0114125
Amygdala	METTL3, PSMD13, RBM12, SMG7, TLE4	0.0071	0.0073	0.0328048	0.0123653
Amygdala	LONP1, METTL3, NDUFAF4, PSMC5	0.0127	0.0021	0.0328048	0.009545
Amygdala	ACOT1, EMC2, LONP1, NDUFAF4	0.0124	0.0023	0.0328048	0.009545
Amygdala	AARS, EMC2, IARS, LONP1, NDUFAF4	0.01	0.0027	0.0328048	0.009545
Amygdala	BPHL, MITD1, TIMM10, TIMM13, YBEY, ZNF655	0.0136	0.0128	0.0328048	0.0168635
Amygdala	ABHD11, ANXA1, EPHA2, METTL3, MGMT	0.014	0.0037	0.0328048	0.009545
Amygdala	ARFGAP2, MYOC, PFN1, RPIA, TKT	0.0247	0.0036	0.0418388	0.009545
Amygdala	DYNLL1, METTL3, TXN	0.0113	0.0081	0.0328048	0.0131824
Amygdala	ANO7, EMC2, LONP1, NDUFAF4, TIMM44	0.0101	0.0007	0.0328048	0.009545
Amygdala	ARFGAP2, ARFIP1, MYOC, PFN1, QDPR, TKT	0.0318	0.0046	0.0487983	0.009545
Amygdala	METTL3, NOS2, PEX5, PSMD13, SCRN2	0.0124	0.0057	0.0328048	0.0107523
Amygdala	MITD1, OARD1, TIMM10, TIMM13, YBEY, ZNF655	0.017	0.0059	0.032814	0.0108261
Amygdala	ANO5, GADD45GIP1, NUP50, RNGTT	0.009	0.0055	0.0328048	0.0106163
Amygdala	MITD1, TFB1M, TIMM10, TIMM13, YBEY, ZNF655	0.0137	0.0098	0.0328048	0.0142702
Amygdala	CPNE8, EHBP1, LONP1, NDUFAF4, NDUFS1	0.0052	0.0159	0.0328048	0.0203031
Amygdala	CSGALNACT2, GOSR1, PNLDC1	0.0029	0.023	0.0328048	0.0284925
Amygdala	ANXA1, EPHA2, METTL3, MGMT	0.0139	0.0052	0.0328048	0.0105268
Amygdala	AMIGO1, CSGALNACT2, GOSR1, PNLDC1, PROM2	0.0048	0.0106	0.0328048	0.014423
Amygdala	GAA, TMEM39A, UQCRFS1	0.0328	0.0104	0.0487983	0.014423
Amygdala	ATPAF2, C11orf54, MYOC, RPIA, TKT	0.0336	0.0027	0.0487983	0.009545
Amygdala	EMC2, LONP1, NDUFAF4, TIMM44	0.0096	0.0016	0.0328048	0.009545
Anterior cingulate cortex BA24	CAV2, HIST1H1C, MPRIP, NUPR1, PRPF4	0.008	0.0001	0.0267692	0.00058
Anterior cingulate cortex BA24	CHIT1, HIST1H1C, WDR5, WDR61	0.0194	0.0015	0.0370696	0.00352703
Anterior cingulate cortex BA24	AIMP1, BPHL, CEP135, MTHFD1L, NDUFAF4, TRAP1	0.0037	0.0001	0.020445	0.00058
Anterior cingulate cortex BA24	HIST1H1C, HIST1H3E, PRPF4, PTGR2, WDR61	0.0118	0.0002	0.0311091	0.0010875
Anterior cingulate cortex BA24	AIMP1, ALDH16A1, CEP135, CEP192, LINC00839, SFI1	0.0029	0.0003	0.0186429	0.00145
Anterior cingulate cortex BA24	ACP6, NDUFAF4, STOML2, SURF1	0.0189	0.0047	0.0370696	0.008178
Anterior cingulate cortex BA24	ANAPC4, BPHL, MTHFD1L, TIMM10, TIMM13	0.0041	0.0046	0.020445	0.008178
Anterior cingulate cortex BA24	ACP6, ALDH5A1, HSCB, NFXL1, STOML2, VEZT	0	0	0	0
Anterior cingulate cortex BA24	CHIT1, HIST1H1C, WDR61	0.0232	0.0012	0.04205	0.00316364
Anterior cingulate cortex BA24	BPHL, HSCB, MTHFD1L, NFXL1, VEZT	0	0	0	0
Anterior cingulate cortex BA24	ALDH5A1, CDC42EP4, HSCB, NFXL1, POLR2E, POLR3H, SEPT11, VEZT	0	0	0	0
Anterior cingulate cortex BA24	BTN2A2, HLA-DRB1, HLA-DRB5, SLC39A2	0.0165	0.0361	0.0350071	0.0442352
Anterior cingulate cortex BA24	ABCE1, GNAZ, HIST1H1C, NDUFAF4, NUFIP1, WDR61	0.0179	0.0021	0.0362163	0.0044561
Anterior cingulate cortex BA24	HIST1H1C, KRI1, WDR61, ZC3H3	0.0137	0.0013	0.0322135	0.00332647
Anterior cingulate cortex BA24	ACP6, BBS7, CCDC8, CDC7, MCM3, PPP2R1B, STOML2	0.0109	0.0038	0.0296344	0.00703404
Anterior cingulate cortex BA24	CALR, CAPZA1, CD40, MPRIP, RPA3, SIRT6	0.0073	0.0016	0.025404	0.00366316
Anterior cingulate cortex BA24	CAPZA1, INTS1, MPRIP, PPP2R1B, RPA3, SIRT6	0.0052	0.0015	0.0205636	0.00352703
Anterior cingulate cortex BA24	ALDH5A1, HSCB, MRPL35, NFXL1, VEZT	0	0	0	0
Anterior cingulate cortex BA24	CCDC167, ERMP1, FAM26F, HSD17B13, UPK1A	0.0169	0.0238	0.0350071	0.0300087
Anterior cingulate cortex BA24	ABCE1, GNAQ, HIST1H1C, NDUFAF4, NUFIP1, WDR61	0.0136	0.0007	0.0322135	0.0025375
Anterior cingulate cortex BA24	CHIT1, EXOSC6, GRWD1, HIST1H1C, WDR61	0.0144	0.0009	0.0327923	0.00261
Anterior cingulate cortex BA24	EFTUD2, HIST1H1C, PRPF4, PTGR2, SIRT6, WDR61	0.0043	0	0.020445	0
Anterior cingulate cortex BA24	CHIT1, HIST1H1C, WDR61, ZC3H3	0.016	0.0011	0.0348	0.00299062
Anterior cingulate cortex BA24	ALDH5A1, HSCB, NDUFAF4, NFXL1, VEZT	0	0	0	0
Anterior cingulate cortex BA24	AIMP1, CEP135, SFI1	0.0047	0.0007	0.020445	0.0025375
Anterior cingulate cortex BA24	CPSF1, HSCB, NFXL1, PRPF4, PTGR2, VEZT	0	0	0	0
Anterior cingulate cortex BA24	MPRIP, TMEM216, VAPB, VEZT	0.0058	0.0008	0.021025	0.00261
Anterior cingulate cortex BA24	CHIT1, GRWD1, HIST1H1C, WDR61	0.0196	0.0009	0.0370696	0.00261
Anterior cingulate cortex BA24	LSM6, PRPF4, PTGR2	0.0124	0.0015	0.0317294	0.00352703
Anterior cingulate cortex BA24	CAV2, GIPC3, PLEKHA2, PRPSAP2	0.0293	0.0057	0.0499824	0.0093566
Anterior cingulate cortex BA24	ALDH5A1, HSCB, MRPS31, NFXL1, SRGAP2, TULP3, VEZT	0	0	0	0
Anterior cingulate cortex BA24	HLA-DPA1, PTPRS, RMDN3, SLC13A3, VEZT	0.0012	0.0005	0.01044	0.002175
Anterior cingulate cortex BA24	ACP6, BBS7, CCDC8, POLR2E, STOML2	0.0205	0.0034	0.0379468	0.00672273
Anterior cingulate cortex BA24	AIMP1, ATP1B3, CEP135, NMRAL1, POMGNT2, SFI1	0.0055	0.0001	0.0208043	0.00058
Anterior cingulate cortex BA24	PHLDB3, PRPF4, PTGR2, YEATS4	0.0132	0.0047	0.0322135	0.008178
Anterior cingulate cortex BA24	ARHGAP12, CEP135, DDX58, OAZ1, SFI1	0.0025	0.0001	0.018125	0.00058
Anterior cingulate cortex BA24	COG4, PEX14, SIRT6	0.0025	0.0009	0.018125	0.00261
Anterior cingulate cortex BA24	CCDC137, EFTUD2, HIST1H1C, PRPF4, PTGR2, SIRT6	0.0052	0	0.0205636	0
Anterior cingulate cortex BA24	HIST1H1C, LTBR, WDR61, ZC3H3	0.0043	0.0035	0.020445	0.00676667
Anterior cingulate cortex BA24	ALDH5A1, HSCB, NFXL1, VEZT	0	0	0	0
Anterior cingulate cortex BA24	CAPZA1, MARK2, PARD6G, SIRT6	0.0106	0.002	0.0296344	0.00435
Anterior cingulate cortex BA24	CAPZA1, ITPA, MARK2, PSMG4, SIRT6, WNT4	0.0108	0.0006	0.0296344	0.00237273
Anterior cingulate cortex BA24	CAPZA1, DNAJC5, MARK2, MPRIP, PARD6G, SIRT6	0.0086	0.0003	0.0270321	0.00145
Anterior cingulate cortex BA24	AIMP1, CEP135, CEP192, CNOT6L, SFI1	0.003	0.0011	0.0186429	0.00299062
Anterior cingulate cortex BA24	CAPZA1, MPRIP, RPA3, SIRT6	0.0094	0.0018	0.0282	0.00401538
Anterior cingulate cortex BA24	AIMP1, CEP135, GCSH, SFI1	0.0045	0.0005	0.020445	0.002175
Anterior cingulate cortex BA24	ALDH5A1, HMGCL, HSCB, NFXL1, SCARA5, VEZT, WDYHV1	0	0	0	0
Anterior cingulate cortex BA24	CAPZA1, CRK, DOCK1, MARK2, PARD6G, SIRT6	0.0147	0.0008	0.0327923	0.00261
Caudate basal ganglia	GNPTAB, MAPK9, PICK1, ZNF593	0.0081	0.0012	0.0276136	0.00216
Caudate basal ganglia	NRAS, PDE5A, SLC4A7, SNAP47, SPG21	0.0213	0.0004	0.0315	0.000923077
Caudate basal ganglia	BARD1, CDC14B, CUL7, MRPL48, POLR2E, RCC1, TSR1	0.0129	0	0.0276136	0
Caudate basal ganglia	CUL7, ECT2, GTPBP4, KIF11, NT5DC3, RCC1, TJP2	0.0134	0	0.0276136	0
Caudate basal ganglia	ANO7, CUL7, ECT2, RCC1, TRAP1	0.0104	0	0.0276136	0
Caudate basal ganglia	B3GAT3, CSGALNACT2, GOSR1, GPR35, NRAS, SNAP47	0.0107	0.0007	0.0276136	0.00146512
Caudate basal ganglia	HMOX2, KCNJ6, NRAS, SLC4A7, SNAP47	0.0168	0.0003	0.0308571	0.00075
Caudate basal ganglia	FYCO1, MAP1LC3A, RABGAP1L	0.0067	0.0009	0.0276136	0.0017234
Caudate basal ganglia	CDS1, ERMP1, NRAS, TMEM237	0.0039	0.0002	0.0276136	0.000545455
Caudate basal ganglia	CUL7, DDX42, RCC1	0.0059	0	0.0276136	0
Caudate basal ganglia	LZTR1, NRAS, SLC4A7, SNAP47	0.0203	0.0002	0.0315	0.000545455
Caudate basal ganglia	FANCI, FLVCR1, NRAS, SNAP47, TMEM41B	0.0112	0	0.0276136	0
Caudate basal ganglia	CPSF1, CUL7, GSTO2, INCA1, RCC1, SEC14L4	0.011	0	0.0276136	0
Caudate basal ganglia	ALDH1B1, ECT2, RPS15, TJP2	0.0188	0.0003	0.0313393	0.00075
Caudate basal ganglia	FYCO1, GRHL3, MNDA, PRMT6	0.0094	0.004	0.0276136	0.00610169
Caudate basal ganglia	CUL7, HIP1R, RAC2, RCC1, VCAM1	0.0068	0	0.0276136	0
Caudate basal ganglia	CLDN9, CYB561, ERMP1, TMEM128	0.0034	0.005	0.0276136	0.0075
Caudate basal ganglia	NRAS, SLC4A7, SNAP47, UNC5B	0.0195	0	0.0313393	0
Caudate basal ganglia	HLA-B, HLA-H, PSMA4, WDR11	0.0298	0.0008	0.0383143	0.0016
Caudate basal ganglia	CSNK1E, CUL7, DDX42, MAPK9, RCC1	0.0092	0	0.0276136	0
Caudate basal ganglia	ECT2, MSLNL, RPS15, TJP2	0.0128	0.0024	0.0276136	0.00392727
Caudate basal ganglia	FAM90A1, FSD2, GNPTAB, NOV	0.0109	0.028	0.0276136	0.0318987
Caudate basal ganglia	B3GAT3, CSGALNACT2, GOSR1, NRAS, SNAP47	0.0113	0.0001	0.0276136	0.0003
Caudate basal ganglia	ECT2, RIC8A, SARNP, TJP2	0.0119	0.0038	0.0276136	0.00589655
Caudate basal ganglia	CLDN9, ERMP1, PPAPDC2	0.0036	0.0089	0.0276136	0.0119552
Caudate basal ganglia	ASS1, DLD, ECT2, PTPRN2, STRAP, TJP2, UQCRC2	0.0147	0	0.0281489	0
Caudate basal ganglia	ACTG1, CTNNB1, ECT2, MAPK9, TJP2	0.0079	0	0.0276136	0
Caudate basal ganglia	EML2, EML3, FYCO1, MAP1LC3A, RABGAP1L	0.0103	0.001	0.0276136	0.00183673
Caudate basal ganglia	FLVCR1, NRAS, SLC4A7, SNAP47	0.0135	0.0001	0.0276136	0.0003
Caudate basal ganglia	CDCA3, NRAS, PLGRKT, SLC4A7, SNAP47	0.0178	0.0008	0.0313393	0.0016
Caudate basal ganglia	GOSR1, NRAS, SLC4A7, SNAP47	0.0128	0.0004	0.0276136	0.000923077
Caudate basal ganglia	CDCA3, COX14, NRAS, PGRMC2, SLC4A7, SNAP47	0.0257	0.002	0.0350455	0.00333333
Caudate basal ganglia	NRAS, RABGAP1L, RNASEH2B, SNAP47	0.0077	0	0.0276136	0
Caudate basal ganglia	ARHGAP27, CDC42, ECT2, MAPK9, TJP2	0.0131	0	0.0276136	0
Caudate basal ganglia	CUL7, ECT2, RCC1, TJP2, XRN2	0.009	0	0.0276136	0
Caudate basal ganglia	CUL7, ECT2, RCC1, TJP2, TRAP1	0.0075	0	0.0276136	0
Caudate basal ganglia	ECT2, LASP1, OXER1, TJP2	0.0104	0.002	0.0276136	0.00333333
Caudate basal ganglia	BARD1, CUL7, HAP1, POLR2E, RCC1	0.0102	0	0.0276136	0
Caudate basal ganglia	CCDC154, EAF1, FGGY, GAS8, HAP1, PNKP	0.0217	0.0111	0.0315	0.0144783
Caudate basal ganglia	FYCO1, HLA-B, IQCB1, PSMA4, SIRT6, WDR11	0.0145	0.0001	0.0281489	0.0003
Caudate basal ganglia	FYCO1, MNDA, PRMT6	0.0083	0.0061	0.0276136	0.00871429
Caudate basal ganglia	GNAZ, MTO1, PSMG4, RGS7, SIRT6, THBS3, TUBB8	0.0028	0.0003	0.0276136	0.00075
Caudate basal ganglia	CSNK1E, FBXL18, LTBR, MAPK9, TRAF1	0.0063	0.0001	0.0276136	0.0003
Caudate basal ganglia	CDC42, ECT2, MAPK9, TJP2	0.0127	0.0001	0.0276136	0.0003
Caudate basal ganglia	LZTR1, NRAS, SLC4A7, SNAP47, VPS4A, ZFYVE19	0.016	0	0.03	0
Caudate basal ganglia	FRS3, GSTO2, HEMK1, INCA1, NOV, SEC14L4	0.0179	0.0019	0.0313393	0.00333333
Caudate basal ganglia	FBXW11, HLA-B, PSMA4, WDR11, ZKSCAN1	0.0119	0	0.0276136	0
Caudate basal ganglia	NRAS, SCYL3, SLC4A7, SNAP47	0.0185	0.0005	0.0313393	0.00109756
Caudate basal ganglia	CDC42, ECT2, KIF17, MAPK9, TJP2	0.013	0.0001	0.0276136	0.0003
Caudate basal ganglia	CUL7, MNDA, NOP58, RCC1	0.0095	0	0.0276136	0
Caudate basal ganglia	IRF2BP2, PSMG4, SIRT6	0.0303	0.0077	0.0384085	0.0108281
Caudate basal ganglia	HLA-B, PSMA4, PSMD13, WDR11, ZFYVE19	0.0244	0.001	0.0337846	0.00183673
Caudate basal ganglia	ACTG1, HIST1H1C, HIST1H3E, KIAA1841	0.0106	0.0037	0.0276136	0.00584211
Caudate basal ganglia	NRAS, PGRMC2, RMDN3, SLC4A7, SNAP47	0.0292	0	0.038087	0
Caudate basal ganglia	ECT2, RPS15, TJP2	0.0147	0.002	0.0281489	0.00333333
Caudate basal ganglia	CD97, NRAS, SLC4A7, SNAP47, TMEM223	0.0189	0	0.0313393	0
Caudate basal ganglia	ALS2CR12, FAM90A1, FSD2, GNPTAB, NOV	0.0135	0.0173	0.0276136	0.02076
Caudate basal ganglia	ASS1, CA10, DLD, PAFAH1B2, PSMG1, PSMG4, SIRT6	0.024	0.0002	0.03375	0.000545455
Caudate basal ganglia	AK8, FYCO1, MNDA, PRMT6, UBE2Z	0.0103	0.0009	0.0276136	0.0017234
Caudate basal ganglia	ASS1, DLD, ECT2, STRAP, TJP2	0.0124	0.0001	0.0276136	0.0003
Caudate basal ganglia	ATP6V0D1, ECT2, RPS15, SNX25, TJP2	0.0214	0.0004	0.0315	0.000923077
Caudate basal ganglia	CUL7, PTPRN2, RCC1, SNX19	0.0107	0	0.0276136	0
Caudate basal ganglia	CEP19, EVI5, FGFR1OP, PDE5A	0.0281	0.0134	0.0371912	0.0169859
Caudate basal ganglia	DLD, ECT2, STRAP, TJP2	0.0132	0.0006	0.0276136	0.00128571
Caudate basal ganglia	CHD1L, NRAS, SNAP47, TGOLN2, WDR11	0.0113	0	0.0276136	0
Caudate basal ganglia	ABCC5, NRAS, SLC4A7, SNAP47	0.0207	0.0005	0.0315	0.00109756
Caudate basal ganglia	CORO7, MTO1, THBS3	0.0014	0.0116	0.0276136	0.0149143
Cerebellar Hemisphere	ATP1B3, HLA-C, MFSD12, NPC1, OPRL1, THEM6, TMEM106B	0.0346	0.0023	0.0478109	0.00388444
Cerebellar Hemisphere	ARF6, NDUFAF4, NOS2, PIP5K1A, PPFIA1, PSMD13	0.0069	0.0009	0.027746	0.00175385
Cerebellar Hemisphere	DCDC2, FAM118A, KIAA1683, NME7, TUBA4A	0.0298	0.0001	0.0435538	0.000361905
Cerebellar Hemisphere	AGPS, MCUR1, NDUFAF4, NIPSNAP1	0.0057	0.0002	0.027746	0.000596078
Cerebellar Hemisphere	ARF6, GPRC5C, MANEA, MFSD12, NDUFAF4, PIP5K1A, SLC39A4	0.0115	0.0002	0.027746	0.000596078
Cerebellar Hemisphere	CDK14, FZR1, IST1, KIF14, NSRP1, PPHLN1, XRCC3	0.0076	0	0.027746	0
Cerebellar Hemisphere	AHCY, APPBP2, GNA15, GPC1, ITGA3, RPS25, ZDHHC18	0.0107	0.0002	0.027746	0.000596078
Cerebellar Hemisphere	CTSZ, ENKD1, HSF2BP, ZNF564	0.0079	0.003	0.027746	0.00485106
Cerebellar Hemisphere	GPC1, HSPA1L, RIN3, RPS25, TUBA4A, ZDHHC18	0.0198	0	0.0341573	0
Cerebellar Hemisphere	ACSL5, ATP1B3, HLA-C, OPRL1, PAK1, PRPSAP1	0.0172	0.0032	0.0314988	0.00506667
Cerebellar Hemisphere	ABCA3, ATP1B3, C2CD2L, GYLTL1B, HLA-C, IL17RC, REEP2	0.02	0.0083	0.0341573	0.0106915
Cerebellar Hemisphere	CDK14, KIF14, NSRP1, PPHLN1, RNPS1, XRCC3, ZNF660	0.0066	0	0.027746	0
Cerebellar Hemisphere	GPC1, ITGA3, RPS25, SLC29A1, UPK1A, ZDHHC18	0.0098	0.0002	0.027746	0.000596078
Cerebellar Hemisphere	ABHD11, CPSF3L, VAC14, ZNF720	0.0317	0.0028	0.0456	0.00457634
Cerebellar Hemisphere	EIF3L, GPC1, HSF2BP, RPS25, TADA2A, ZDHHC18, ZNF564	0.0115	0	0.027746	0
Cerebellar Hemisphere	ELP2, HSF2BP, KIF5B, PTPN21, SMEK2, ZNF564	0.0128	0.0002	0.0281096	0.000596078
Cerebellar Hemisphere	C4orf27, KCNJ6, TMEM218	0.0131	0.0001	0.0281096	0.000361905
Cerebellar Hemisphere	AGPS, CDK5RAP2, NIPSNAP1, PFKL, POLR2C	0.0046	0	0.027746	0
Cerebellar Hemisphere	CBS, GPN1, NSRP1, XRCC3	0.0062	0.0002	0.027746	0.000596078
Cerebellar Hemisphere	ARF6, NDUFAF4, PIP5K1A, SLC29A1	0.0069	0.0008	0.027746	0.00157922
Cerebellar Hemisphere	C4orf27, KCNJ6, PFKL, PFKM, TMEM218	0.009	0	0.027746	0
Cerebellar Hemisphere	LGR4, PFKL, POLR1A, POLR2C, POLR2E	0.0095	0.0004	0.027746	0.000980645
Cerebellar Hemisphere	CDK14, KIF14, METAP1, NSRP1, PPHLN1, XRCC3	0.0071	0	0.027746	0
Cerebellar Hemisphere	ABHD17A, HSF2BP, LTBR, TRAF1, ZNF564	0.0062	0.0045	0.027746	0.00645283
Cerebellar Hemisphere	AHCYL2, ELP2, PIP5K1A, PTPN21	0.0288	0.0001	0.0433864	0.000361905
Cerebellar Hemisphere	ARF6, CAMLG, KCNE4, NDUFAF4, PIP5K1A, SLC29A1	0.0105	0	0.027746	0
Cerebellar Hemisphere	AGPS, CBS, NIPSNAP1, TRAP1	0.0046	0	0.027746	0
Cerebellar Hemisphere	CDK14, KIF14, NSRP1, PPHLN1, PPIL1, PRR22, XRCC3	0.0063	0	0.027746	0
Cerebellar Hemisphere	CBS, CD274, GGCT, OAT, TGM1	0.0114	0.0003	0.027746	0.000814286
Cerebellar Hemisphere	EIF3L, GPC1, ITGA3, RPS25, ZDHHC18	0.0132	0.0001	0.0281096	0.000361905
Cerebellar Hemisphere	DCDC2, FAM118A, HSPA1L, SIRT6, TUBA4A	0.0079	0.0006	0.027746	0.00123243
Cerebellar Hemisphere	COMMD2, COMMD4, TP53RK, TRIM16L	0.0063	0.0006	0.027746	0.00123243
Cerebellar Hemisphere	AGPS, BSND, CBS, CTSA, NIPSNAP1, OAT, TRAP1	0.0084	0	0.027746	0
Cerebellar Hemisphere	ARF6, CPSF3L, NDUFAF4, PIP5K1A, SLC29A1, TRIP13	0.0107	0	0.027746	0
Cerebellar Hemisphere	DCDC2, FAM118A, THBS3, TTLL5, TUBA4A	0.0291	0.0005	0.0433864	0.00110145
Cerebellar Hemisphere	ACADM, AGPS, AP1M1, EVI5L, MCUR1, NIPSNAP1	0.0103	0	0.027746	0
Cerebellar Hemisphere	ELP2, HSF2BP, KIF5B, PTPN21, SLC38A10, ZNF564	0.0108	0.0001	0.027746	0.000361905
Cerebellar Hemisphere	ELP2, ERBB4, MTMR6, PTPN21	0.029	0.0007	0.0433864	0.00141867
Cerebellar Hemisphere	CTTN, GPC1, ITGA3, NSRP1, XRCC3	0.0062	0.0005	0.027746	0.00110145
Cerebellar Hemisphere	FAM178A, HSF2BP, OPTN, RAB11B, ZNF564	0.0142	0.0003	0.0287787	0.000814286
Cerebellar Hemisphere	ATP1B3, CDK14, HLA-C, KIF14, NSRP1, PPHLN1, XRCC3	0.0063	0.0002	0.027746	0.000596078
Cerebellar Hemisphere	AGPS, CDK5RAP2, NIPSNAP1, NME7	0.0101	0.0001	0.027746	0.000361905
Cerebellar Hemisphere	HSPA1L, NINL, NME7, TTLL5	0.028	0.0083	0.0433864	0.0106915
Cerebellar Hemisphere	HSPA1L, RIN3, RPS25, TGM1, TUBA4A, ZDHHC18	0.0245	0	0.0392	0
Cerebellar Hemisphere	ENKD1, GPATCH2L, HSF2BP, ZNF547, ZNF564	0.0149	0.0101	0.0290359	0.0125836
Cerebellar Hemisphere	C4orf27, IFNGR2, KCNJ6, TMEM218	0.0137	0.0001	0.0281405	0.000361905
Cerebellar Hemisphere	CD40, HSF2BP, NCOA6, TRAF1, ZNF564	0.0205	0.0038	0.0346222	0.00571881
Cerebellar Hemisphere	PFKL, POLR1A, POLR2C, POLR2E	0.0073	0.0012	0.027746	0.00219759
Cerebellar Hemisphere	AGPS, HMOX2, NDRG4, NIPSNAP1, SYNGR1	0.0068	0	0.027746	0
Cerebellar Hemisphere	ARF6, DPYSL4, NDUFAF4, PIP5K1A, SLC29A1, TRIP13	0.0084	0	0.027746	0
Cerebellar Hemisphere	ABHD17A, BIRC2, GPR107, LTBR, MAP3K3	0.0059	0.0031	0.027746	0.00496
Cerebellar Hemisphere	ARHGEF7, CBL, CD5, HSPA1L, TEK	0.0082	0.0202	0.027746	0.0234382
Cerebellar Hemisphere	ABHD17A, AGPS, CDK5RAP2, NIPSNAP1, NME7, TCEANC2, TNIP1	0.0096	0	0.027746	0
Cerebellar Hemisphere	ALDH18A1, DARS2, NT5C3A, RAB11B, TSPAN33	0.0045	0	0.027746	0
Cerebellar Hemisphere	GPC1, ITGA3, RPS25, ZDHHC18	0.0168	0.0004	0.0314988	0.000980645
Cerebellar Hemisphere	C16orf59, FGL1, GTF2H2, MAP3K3, PPIL2, RIPK1	0.0236	0.0028	0.038572	0.00457634
Cerebellar Hemisphere	FAM120B, GSTM3, HSF2BP, PPP1R13B, ZGPAT, ZNF564	0.0134	0.0097	0.0281096	0.0121851
Cerebellar Hemisphere	ENKD1, HSF2BP, ZNF564	0.0121	0.0058	0.0281096	0.00787143
Cerebellar Hemisphere	ARHGEF7, CBL, CD5, HSPA1L	0.0049	0.0386	0.027746	0.0434607
Cerebellar Hemisphere	ABCA3, ATP1B3, HLA-C, OPRL1	0.0172	0.0132	0.0314988	0.0155535
Cerebellar Hemisphere	ENKD1, HSF2BP, POGZ, ZNF564, ZXDC	0.0169	0.0035	0.0314988	0.00537374
Cerebellar Hemisphere	COQ9, NIPSNAP1, TSPAN33	0.0048	0.0001	0.027746	0.000361905
Cerebellar Hemisphere	CCDC136, HSF2BP, NME7, ZNF564, ZNF696	0.0178	0.0035	0.0322095	0.00537374
Cerebellar Hemisphere	CDK14, DHX36, KIF14, NSRP1, PARVA, PPHLN1, XRCC3	0.0098	0	0.027746	0
Cerebellar Hemisphere	COMMD4, NME7, PCM1, TP53RK, TTLL5	0.0088	0.0005	0.027746	0.00110145
Cerebellar Hemisphere	AGPAT4, CYB5A, DRG2, HSPA14	0.0251	0.0126	0.0397417	0.0149625
Cerebellar Hemisphere	COMMD2, COMMD4, TP53RK	0.006	0.0001	0.027746	0.000361905
Cerebellar Hemisphere	HSF2BP, LTBR, RNF166, TNKS2, TRAF1, ZNF564	0.0082	0.0027	0.027746	0.00450989
Cerebellar Hemisphere	MAL2, NDRG4, TPD52L1	0.0149	0.0312	0.0290359	0.0356571
Cerebellar Hemisphere	DHX36, MON1B, PARVA, VPS11	0.0324	0.0073	0.0456	0.00956552
Cerebellar Hemisphere	DCDC2, FAM118A, TUBA4A	0.0293	0.0011	0.0433864	0.0020642
Cerebellar Hemisphere	CDK14, KIF14, NSRP1, PPHLN1, PTPN4, RIMS1, UNC13B, XRCC3	0.0072	0	0.027746	0
Cerebellar Hemisphere	OAZ1, PFKL, POLR1A, POLR2C, POLR2E, TAF1B	0.0089	0.0004	0.027746	0.000980645
Cerebellar Hemisphere	BSND, CSGALNACT2, MANEA	0.0357	0.0102	0.0488865	0.0126049
Cerebellar Hemisphere	GPC1, ITGA3, PFKL, RNF31, RPS25, TUBA4A, ZDHHC18	0.0113	0	0.027746	0
Cerebellar Hemisphere	ATP1B3, NMRAL1, PFKL, POLR2C, POLR2E	0.0079	0.0021	0.027746	0.00358652
Cerebellar Hemisphere	BDKRB1, CERS1, HHATL, LAPTM4B	0.0254	0.0004	0.0398021	0.000980645
Cerebellar Hemisphere	CCDC149, NDRG4, PRNP, TUBA4A	0.0244	0	0.0392	0
Cerebellar Hemisphere	CDK3, FAM35A, HSPA1L, SIRT6, TUBA4A	0.006	0.0038	0.027746	0.00571881
Cerebellar Hemisphere	ABL1, CBL, CD5, DOK1, EIF2A, HSPA1L	0.0101	0.0092	0.027746	0.0116533
Cerebellar Hemisphere	ALDH16A1, ALDH1L2, CLUAP1	0.0294	0.0066	0.0433864	0.0088
Cerebellar Hemisphere	ABHD17A, GLTSCR1L, HSF2BP, QRICH1, TRAF1, ZNF564	0.0158	0.0016	0.0304	0.0027954
Cerebellar Hemisphere	ELP2, IRS2, JAK1, PTPN21	0.033	0.0041	0.0460183	0.0061098
Cerebellar Hemisphere	BEGAIN, ENKD1, GMCL1, HSF2BP, TGM1, ZNF564	0.0145	0.0016	0.029	0.0027954
Cerebellar Hemisphere	EXOSC6, EXOSC8, MPHOSPH6	0.0098	0.0084	0.027746	0.0107294
Cerebellar Hemisphere	ATP1B3, CBS, EVI5L, OAT, SLC15A3	0.0215	0.0016	0.035687	0.0027954
Cerebellar Hemisphere	ADRA2B, ARF6, GGA2, NDUFAF4, PIP5K1A, SLC29A1	0.0076	0.0005	0.027746	0.00110145
Cerebellar Hemisphere	ENKD1, HSF2BP, ZGPAT, ZNF564	0.0078	0.0049	0.027746	0.00683303
Cerebellar Hemisphere	SCAND1, SLC17A9, ZSCAN18	0.0366	0.0115	0.0496714	0.013873
Cerebellar Hemisphere	ERCC3, GTF2H2, PFKL, POLR2C, POLR2E	0.0064	0.0047	0.027746	0.00667664
Cerebellar Hemisphere	ALDH16A1, DCDC2, FAM118A, KIAA1683, LINC00839, NME7, TUBA4A	0.0321	0.0003	0.0456	0.000814286
Cerebellar Hemisphere	BDKRB1, CERS1, HHATL	0.0188	0.0035	0.032846	0.00537374
Cerebellar Hemisphere	ARF6, CAMLG, NDUFAF4, PIP5K1A, SLC29A1, TMUB1	0.0062	0.0006	0.027746	0.00123243
Cerebellar Hemisphere	EAF1, FGGY, HSF2BP, ZNF564	0.0185	0.0054	0.0326977	0.00739459
Cerebellar Hemisphere	GPC1, HLA-A, HLA-DRB5, ITGA3, RPS25, ZDHHC18	0.0135	0.0001	0.0281096	0.000361905
Cerebellar Hemisphere	BEGAIN, ENKD1, HSF2BP, ZNF564	0.0117	0.0043	0.0277875	0.00628462
Cerebellar Hemisphere	GPC1, ITGA3, PPHLN1, RABIF, TSGA10, ZNF544	0.0128	0.0001	0.0281096	0.000361905
Cerebellar Hemisphere	CDK14, KIF14, NSRP1, PPHLN1, XRCC3	0.0061	0	0.027746	0
Cerebellar Hemisphere	ELP2, PAFAH1B2, PTPN21, SCAND1, TRIP6	0.0216	0.0002	0.035687	0.000596078
Cerebellar Hemisphere	FBXO25, NSRP1, TUBA4A, XRCC3	0.0058	0	0.027746	0
Cerebellar Hemisphere	LGR4, PFKL, POLR1A, POLR2C, POLR2E, RFWD3	0.0099	0.0001	0.027746	0.000361905
Cerebellar Hemisphere	ABHD17A, HSF2BP, TRAF1, ZNF564	0.0185	0.0049	0.0326977	0.00683303
Cerebellar Hemisphere	ABHD11, AMT, CPSF3L, VAC14, ZNF720	0.0319	0.0012	0.0456	0.00219759
Cerebellar Hemisphere	ARF6, NDUFAF4, PIP5K1A, PPFIA1, SLC29A1	0.0072	0.0005	0.027746	0.00110145
Cerebellar Hemisphere	ACTC1, ARID3A, NSRP1, TNNI3K, XRCC3	0.0077	0.0005	0.027746	0.00110145
Cerebellar Hemisphere	ADRA2B, ARF6, GGA3, NDUFAF4, PIP5K1A, SLC29A1	0.0087	0.0004	0.027746	0.000980645
Cerebellar Hemisphere	ALDH7A1, CDK14, KIF14, MCC, NSRP1, PPHLN1, STK24, XRCC3	0.0078	0	0.027746	0
Cerebellar Hemisphere	CTNNAL1, HSF2BP, SNTG2, ZGPAT, ZNF564	0.0134	0.005	0.0281096	0.00690909
Cerebellar Hemisphere	CENPJ, COMMD4, PPHLN1, TP53RK	0.0069	0.0006	0.027746	0.00123243
Cerebellar Hemisphere	HSF2BP, LTBR, RNF114, RNF38, TRAF1, ZNF564	0.0051	0.0113	0.027746	0.0138516
Cerebellar Hemisphere	GPC1, ITGA3, RABIF, RPS25, ZDHHC18	0.0125	0	0.0281096	0
Cerebellum	BRD2, CENPC, DNAJC17, GPT, ITGA3	0.0184	0.0004	0.0262205	0.00128571
Cerebellum	DPYSL4, SIRT6, SKP2, WDR59	0.0109	0.0052	0.0261509	0.00693333
Cerebellum	AFF4, CENPC, DHX8, DNAJC17, EPB41L3, SAP18, YWHAE	0.0166	0	0.0261951	0
Cerebellum	RIN3, TGM1, VASN, YWHAE, YWHAH	0.0174	0.0009	0.0261951	0.002025
Cerebellum	KIAA1683, LINC00839, TAS1R3, WDR59	0.0154	0.0008	0.0261509	0.00182278
Cerebellum	FAM163A, HERC6, HLA-DRB5, KCTD15, YWHAE	0.0229	0.001	0.0290282	0.00219512
Cerebellum	HMOX2, POR, SYNGR1, VIPR2	0.0098	0.008	0.0261509	0.00993103
Cerebellum	CENPC, KRI1, NOV, PAPD5, ZNF330	0.0058	0.0015	0.0261509	0.00284211
Cerebellum	ANKRD26, LATS1, LIME1, MOB3B, ROBO1, STX6	0.0063	0.0003	0.0261509	0.00108
Cerebellum	CCDC146, HIP1R, VPS28	0.0185	0.0063	0.0262205	0.0081
Cerebellum	ANP32E, CENPC, CEP164, DNAJC17, RNASEH2B, SAP18	0.0214	0	0.0281168	0
Cerebellum	RIPK1, TAB2, TICAM1	0.0011	0	0.0261509	0
Cerebellum	FGFR1, MARCH1, MRPS7, MTRF1L, PPP2R1B	0.0128	0.0026	0.0261509	0.00421622
Cerebellum	C1orf109, GIGYF1, ZNF17	0.0175	0.011	0.0261951	0.0127742
Cerebellum	CCDC101, HMOX2, POR, RABGAP1L, VIPR2	0.0096	0.0037	0.0261509	0.00550413
Cerebellum	CBL, RIPK1, TAB2, YWHAE	0.0013	0	0.0261509	0
Cerebellum	CBR1, CBR3, LIME1, ROBO1, STX6	0.0102	0.0003	0.0261509	0.00108
Cerebellum	B4GALT3, LMF1, PON2, POR	0.0171	0.0164	0.0261951	0.018566
Cerebellum	FGFR1, MARCH1, MRPS7, NDUFB10, PPP2R1B	0.0154	0.0028	0.0261509	0.0045
Cerebellum	CBL, ITGAV, NOV, RIPK1, TAB2, YWHAE	0.0025	0	0.0261509	0
Cerebellum	ABAT, ACP6, DHX36, HSD17B14, SUCLG2	0.0026	0.0002	0.0261509	0.000837209
Cerebellum	FAM163A, HLA-DRB5, YWHAE	0.015	0.0041	0.0261509	0.00585714
Cerebellum	ANP32E, CENPC, DNAJC17, KRI1, NCOA6, PARP1	0.0199	0	0.0269333	0
Cerebellum	FGFR1, LTBR, MARCH1, PPP2R1B, TCHP	0.0094	0.0049	0.0261509	0.00663158
Cerebellum	HLA-DRB1, HLA-DRB5, MARCH1, YWHAE	0.012	0.0029	0.0261509	0.00457895
Cerebellum	ALDH1L2, GRWD1, POLR1D, POLR2E, ZSCAN1	0.0097	0	0.0261509	0
Cerebellum	C1orf109, CCDC101, GIGYF1, NICN1, TADA2A, TTC9C	0.0091	0.0052	0.0261509	0.00693333
Cerebellum	CENPC, DEF6, DNAJC17, EPB41L3, SAP18, YWHAE	0.0175	0	0.0261951	0
Cerebellum	ALDH1L2, CCDC101, GRWD1, NCOA6, WDR5, WDR59	0.0073	0	0.0261509	0
Cerebellum	CPE, MED31, POLR2E, PPL, ZSCAN1	0.0124	0.0007	0.0261509	0.00172603
Cerebellum	APPBP2, C1QTNF2, KCNIP3, LRP2BP, NICN1, P4HA3	0.0149	0	0.0261509	0
Cerebellum	COQ9, TSPAN33, YWHAE	0.0092	0.0013	0.0261509	0.00257143
Cerebellum	HLA-DRB5, TLK1, YWHAE	0.0121	0.0045	0.0261509	0.00627907
Cerebellum	CCDC101, CENPC, DNAJC17, HIP1R, TFIP11	0.0138	0.0002	0.0261509	0.000837209
Cerebellum	KLHL3, SLC43A3, WNK2	0.0213	0.0219	0.0281168	0.0244845
Cerebellum	CENPC, DNAJC17, HIP1R, TRIM14, VPS28	0.0359	0.0001	0.0411592	0.000545455
Cerebellum	HMOX2, PON2, POR, VIPR2	0.0183	0.0053	0.0262205	0.0069635
Cerebellum	BDKRB2, MPI, RIN3, TGM1, YWHAE, YWHAH	0.0199	0.0004	0.0269333	0.00128571
Cerebellum	ANKRD26, LIME1, ROBO1, STX6	0.009	0.001	0.0261509	0.00219512
Cerebellum	LIME1, RIN3, ROBO1, SPRY4, STX6	0.0092	0.0005	0.0261509	0.00142857
Cerebellum	HMOX2, MED31, POR, VIPR2, ZSCAN1	0.0149	0.0005	0.0261509	0.00142857
Cerebellum	BSND, CSGALNACT2, MGAT4C, TOR1B	0.0135	0.0361	0.0261509	0.0386786
Cerebellum	CDK6, POLR2E, PPL, RBBP9, RBL2, ZSCAN1	0.0136	0.0015	0.0261509	0.00284211
Cerebellum	FAM163A, HLA-DRB5, PAFAH1B2, YWHAE	0.0165	0.0017	0.0261951	0.003
Cerebellum	BRICD5, CLDN4, CSGALNACT2, ICAM3, MGAT4C, TOR1B, TRIM59	0.024	0.0238	0.0297931	0.0262822
Cerebellum	ATP5O, COQ9, FGFR1, TSPAN33, YWHAE	0.0081	0.0001	0.0261509	0.000545455
Cerebellum	CARS, EIF2A, PIH1D1, RPIA, SNRNP27, WDR5B, YWHAE	0.0133	0.0004	0.0261509	0.00128571
Cerebellum	C1orf109, CCDC101, GIGYF1, TADA2A	0.0064	0.0094	0.0261509	0.0112053
Cerebellum	BPHL, FOXRED1, MUT, TIMM13	0.0201	0.0072	0.0269333	0.00919149
Cerebellum	HLA-A, HLA-C, HLA-DRB5, YWHAE	0.0139	0.0101	0.0261509	0.0118824
Cerebellum	LYPLA2, MED31, POLR2E, PPL, ZSCAN1	0.0144	0.0026	0.0261509	0.00421622
Cerebellum	EDEM1, FBXO6, TMCO1, YWHAE	0.0099	0	0.0261509	0
Cerebellum	CARS, LITAF, TAB2	0.0007	0.0001	0.0261509	0.000545455
Cerebellum	KRI1, LIME1, MYO6, ROBO1, STX6	0.0067	0.0002	0.0261509	0.000837209
Cerebellum	GIGYF1, HSD17B14, PRMT6, SNRPC, WBSCR27	0.0096	0.0055	0.0261509	0.00717391
Cerebellum	LIME1, ROBO1, SLC29A1, STX6	0.0039	0.0012	0.0261509	0.00245455
Cerebellum	LIME1, ROBO1, STX6	0.006	0.0012	0.0261509	0.00245455
Cerebellum	POLR2E, POLR3K, RIN3, ZSCAN1	0.0288	0.0016	0.0341053	0.00296907
Cerebellum	FGFR1, RAB1A, RIN3, TMCO1	0.0162	0.0006	0.0261951	0.00163636
Cerebellum	NPC1, POR, TMCO1	0.0076	0.0012	0.0261509	0.00245455
Cerebellum	CARS, CNN2, NAGK, PIH1D1, YWHAE	0.0109	0.0004	0.0261509	0.00128571
Cerebellum	HLA-DRB5, RIN3, SIRT6, SMC2, YWHAE	0.0065	0.0007	0.0261509	0.00172603
Cerebellum	BSND, CSGALNACT2, GXYLT2, MGAT4C, TOR1B	0.0118	0.0118	0.0261509	0.0135287
Cerebellum	EPB41L3, HLA-DRB5, YWHAE	0.0124	0.0018	0.0261509	0.00314563
Cerebellum	CENPC, DHX40, DNAJC17, KRI1, MYO6	0.0166	0.0003	0.0261951	0.00108
Cerebellum	BIN1, GPC1, ITGA3, RIN3, YWHAE	0.0167	0.0006	0.0261951	0.00163636
Cerebellum	ACTR8, BRD2, CENPC, DNAJC17, GPT, INO80C	0.0277	0.0005	0.0339184	0.00142857
Cerebellum	ANAPC4, GPHN, NICN1, POLR2C, TAB2, TTLL1	0.0021	0.0007	0.0261509	0.00172603
Cerebellum	COQ9, TEX264, TSPAN33, YWHAE	0.0101	0.0001	0.0261509	0.000545455
Cerebellum	GGCT, NACA, PINK1, YWHAE	0.0179	0	0.0261951	0
Cerebellum	ACOT2, FGFR1, MRPS7, MTRF1L, PPP2R1B	0.0089	0.0059	0.0261509	0.00764029
Cerebellum	AKT1, FGFR1, RNF8, SIRT6, YWHAE	0.0038	0.0008	0.0261509	0.00182278
Cerebellum	COQ9, NDUFAF4, TRAP1, TSPAN33, UQCRFS1, YWHAE	0.0076	0.0002	0.0261509	0.000837209
Cerebellum	NCOA6, POLR2E, RNF8, SIRT6, XRCC5, ZSCAN1	0.0087	0.0007	0.0261509	0.00172603
Cerebellum	PCDHB5, PON2, POR, PTP4A2	0.0151	0.0112	0.0261509	0.0129231
Cerebellum	COQ9, PCDHB5, RDH13, TSPAN33, YWHAE	0.011	0.0002	0.0261509	0.000837209
Cerebellum	POLR2E, TLK1, YWHAE, ZSCAN1, ZSCAN22	0.0118	0.0004	0.0261509	0.00128571
Cerebellum	ABCC2, AP1M1, IFRD1, MYOD1, NIPSNAP3A, UQCRFS1	0.04	0.025	0.0441718	0.027439
Cerebellum	CARS, CNN2, LNX2, NAGK, PIH1D1, YWHAE, ZNF410	0.0126	0	0.0261509	0
Cerebellum	BAAT, DDB1, DLC1, HLTF, S100A10, SIRT6, SULT1C2, YWHAE	0.0116	0.0011	0.0261509	0.00235714
Cerebellum	ADRA2A, BDKRB2, CD81, GIGYF1, GNG2, HSD17B14, SNRPC	0.0235	0.0008	0.029375	0.00182278
Cerebellum	CYB561, RIPK1, SLC19A3, TAB2	0.0018	0.0001	0.0261509	0.000545455
Cerebellum	CAPZA2, HIP1R, KRI1, MYO6, RIN3	0.014	0.0001	0.0261509	0.000545455
Cerebellum	CDH15, CDON, CEACAM21, FGFR1, MARCH1, PPP2R1B	0.0197	0.0048	0.0269333	0.00654545
Cerebellum	COQ9, ENDOG, NDUFAF4, OMA1, TSPAN33, YWHAE	0.0114	0.0001	0.0261509	0.000545455
Cerebellum	FAM65B, MAP2K2, MYOF, RIN3, YWHAE, YWHAH	0.0177	0	0.0261951	0
Cerebellum	CCDC146, FOXD4L1, HIP1R, KRT34, VPS28	0.0383	0.0038	0.0428199	0.00560656
Cerebellum	APPBP2, CNPY2, CTC1, MYLIP, VLDLR	0.0426	0.0002	0.0467561	0.000837209
Cerebellum	ACY3, AIDA, DDIT4L, FAM118A, RPIA	0.0295	0.0011	0.0345974	0.00235714
Cerebellum	AKAP1, MRPL20, MRPL35, RIPK1, TAB2	0.0024	0.0001	0.0261509	0.000545455
Cerebellum	BMPR1A, CARS, FGFR1, LITAF, MAP2K2, TAB2	0.0014	0.0003	0.0261509	0.00108
Cerebellum	HIST4H4, PRMT6, RNF8, USP16, WBSCR27	0.0082	0.0095	0.0261509	0.01125
Cerebellum	C1orf109, GIGYF1, HSD17B14, SNRPC	0.0107	0.0121	0.0261509	0.0137848
Cerebellum	MED31, POLR2E, PPL, ZSCAN1	0.0135	0.0034	0.0261509	0.00514286
Cerebellum	EBI3, FGFR1, IL27RA, MARCH1, PPP2R1B	0.0202	0.0039	0.0269333	0.00566129
Cerebellum	CENPC, DNAJC17, EPB41L3, SAP18, YWHAE	0.0154	0	0.0261509	0
Cerebellum	ATP6V0A1, CYTH2, GNAQ, SMPD3, ZNF843	0.0181	0.0003	0.0262205	0.00108
Cerebellum	CARS, HLA-DRB5, MPHOSPH6, PIH1D1, THOP1, YWHAE	0.0089	0.0005	0.0261509	0.00142857
Cerebellum	EXOSC5, MPHOSPH6, PAPD5	0.0043	0.0205	0.0261509	0.0230625
Cerebellum	CENPC, DNAJC17, HIP1R, TRIM14, TSGA10, VPS28, ZNF410	0.0314	0	0.0362308	0
Cerebellum	D2HGDH, DCUN1D4, TOP3A, YBEY	0.0044	0.0022	0.0261509	0.00370093
Cerebellum	HMOX2, POR, SLC33A1, TAP1, VIPR2	0.0235	0.008	0.029375	0.00993103
Cerebellum	HLA-DRB1, HLA-DRB5, YWHAE	0.0142	0.009	0.0261509	0.0108
Cerebellum	ACP6, DHX36, SUCLG2	0.0019	0.0007	0.0261509	0.00172603
Cerebellum	ACP6, CPOX, DHX36, FDX1L, SUCLG2	0.0039	0.0005	0.0261509	0.00142857
Cerebellum	CCDC101, CENPC, DNAJC17, HIP1R, LYSMD1, TFIP11	0.0151	0	0.0261509	0
Cerebellum	GLO1, GRHPR, HLA-DRB5, HSD17B14, YWHAE	0.009	0.0032	0.0261509	0.00496552
Cerebellum	LIME1, PPFIA1, PSMD13, ROBO1, STX6	0.0071	0.0025	0.0261509	0.00412844
Cerebellum	ALDH1L2, CEP164, GRWD1, NACA, NSUN2	0.0094	0	0.0261509	0
Cerebellum	GRPEL1, HLA-DRB5, RIN3, YWHAE	0.0219	0.0023	0.0285652	0.00383333
Cerebellum	COQ9, NDUFAF4, POU5F1, PSMD13, TSPAN33, YWHAE	0.0108	0.0006	0.0261509	0.00163636
Cerebellum	NEK1, RIN3, YWHAE, YWHAH	0.0137	0.0015	0.0261509	0.00284211
Cerebellum	MAP2K2, RIN3, YWHAE, YWHAH	0.0137	0.0005	0.0261509	0.00142857
Cerebellum	GIGYF1, HSD17B14, SF3A2, SNRPC	0.0171	0.0034	0.0261951	0.00514286
Cerebellum	AKAP1, GJB2, INADL, NCLN, SLC33A1, TAB2	0.0033	0.0007	0.0261509	0.00172603
Cerebellum	ANP32E, CENPC, KRI1, NCOA6, NOC3L, PARP1	0.019	0.0004	0.0267187	0.00128571
Cerebellum	ABCC2, PHYHIP, PRKD2, UQCRFS1	0.0302	0.0253	0.035071	0.0276
Cerebellum	ATP6V0A1, CYTH2, GJB2, GNAQ, SMPD3, TBXA2R	0.0285	0.0002	0.0339735	0.000837209
Cerebellum	ATP6V0A1, CYTH2, SMPD3	0.0201	0.0008	0.0269333	0.00182278
Cerebellum	CPOX, FDX1, GRHPR, HLA-DRB5, YWHAE	0.0132	0.0109	0.0261509	0.0127403
Cerebellum	HMOX2, MARCH8, POR, VIPR2, WDR6	0.0271	0.0043	0.033411	0.00609449
Cerebellum	ALDH1L2, GRWD1, NACA, PEBP1, POR	0.0081	0	0.0261509	0
Cerebellum	ALDH16A1, LINC00839, TAS1R3	0.0115	0.0008	0.0261509	0.00182278
Cerebellum	CTU1, FGFR1, LTBR, MARCH1, PPP2R1B	0.0097	0.004	0.0261509	0.00576
Cerebellum	CEP164, GPX1, PAPD5, RPP38	0.0076	0.0053	0.0261509	0.0069635
Cerebellum	CSGALNACT2, EDEM1, MGAT4C, MPPE1, TOR1B	0.0115	0.0286	0.0261509	0.0308263
Cerebellum	CENPC, DEF6, DNAJC17, L3MBTL3, SAP18, TSTD2	0.028	0.0002	0.0339463	0.000837209
Cerebellum	ERCC3, GTF2H2, POLR2E, PPL, ZSCAN1	0.0148	0.0084	0.0261509	0.0102162
Cerebellum	CPSF3L, GIGYF1, HSD17B14, SNRPC	0.0127	0.0013	0.0261509	0.00257143
Cerebellum	CENPC, DEF6, DNAJC17, L3MBTL3, SAP18	0.0281	0.0003	0.0339463	0.00108
Cerebellum	DDB1, RIN3, SIRT6, YWHAE	0.007	0.0007	0.0261509	0.00172603
Cerebellum	RNF8, SENP5, SUMO3, USP16	0.0067	0.0266	0.0261509	0.0288434
Cerebellum	ALDH1L2, GRWD1, NACA	0.0074	0	0.0261509	0
Cerebellum	HLA-DRB5, RIN3, YWHAE, YWHAH	0.0136	0.0017	0.0261509	0.003
Cerebellum	ABCC2, ACOT2, FGFR1, MRPL37, MRPS7, MTRF1L, UQCRFS1	0.0105	0.0046	0.0261509	0.00636923
Cerebellum	FGFR1, FOXRED1, MARCH1, MRPS7, NDUFB10, PPP2R1B	0.0173	0.0012	0.0261951	0.00245455
Cerebellum	CDK6, FZR1, LNP1, POLR2E, ZSCAN1	0.015	0.0085	0.0261509	0.0102685
Cerebellum	BDKRB1, CERS1, HHATL	0.0382	0.0047	0.0428199	0.00645802
Cerebellum	GPC1, HLA-DRB5, ITGA3, YWHAE	0.0165	0.0017	0.0261951	0.003
Cerebellum	FGFR1, MRPL35, MRPL40, MRPS7, MTRF1L, PPP2R1B	0.0226	0.0014	0.0288511	0.00273913
Cerebellum	DENND4B, NFXL1, POR, ST7, TMCO1	0.004	0	0.0261509	0
Cerebellum	APPBP2, IKBKE, RIPK1, TAB2	0.0025	0	0.0261509	0
Cerebellum	HLA-A, HLA-C, HLA-DRB5, KIFC2, MAPK8IP2, SLC39A13, YWHAE	0.0283	0.0022	0.03396	0.00370093
Cerebellum	HLA-DRB5, MTA2, SIRT6, YWHAE	0.0065	0.0019	0.0261509	0.00328846
Cerebellum	CARS, HLA-DRB5, PIH1D1, YWHAE	0.0089	0.0005	0.0261509	0.00142857
Cerebellum	CEP164, DBT, KRI1, LIME1, MYO6, ROBO1, STX6	0.008	0	0.0261509	0
Cerebellum	ABCC2, NIPSNAP3A, UQCRFS1	0.0222	0.0457	0.0287482	0.0483882
Cerebellum	B4GALT3, HMOX2, PON2, POR, VIPR2	0.0199	0.003	0.0269333	0.00469565
Cerebellum	FGFR1, MARCH1, MRPS27, MRPS7, PPP2R1B	0.0142	0.0034	0.0261509	0.00514286
Cerebellum	COQ9, CYB561, GIMAP5, MGST3, TSPAN33, YWHAE	0.0107	0.0001	0.0261509	0.000545455
Cerebellum	HLA-DRB5, NOS2, PSMD13, YWHAE	0.0076	0.008	0.0261509	0.00993103
Cerebellum	NMNAT1, NOC3L, PAPD5, WDR46	0.006	0.0236	0.0261509	0.0262222
Cerebellum	AFF4, CARS, EAF1, FGGY, PIH1D1, YWHAE	0.0109	0.0003	0.0261509	0.00108
Cerebellum	BDKRB2, CD81, GIGYF1, HSD17B14, SNRPC	0.0169	0.0022	0.0261951	0.00370093
Cerebellum	ABCC2, FGFR1, MRPS7, MTRF1L, OAT, UQCRFS1	0.0092	0.0013	0.0261509	0.00257143
Cerebellum	FGFR1, MAL2, RNF8, SCN3B	0.0119	0.0082	0.0261509	0.0100408
Cerebellum	FGFR1, HLA-DRB1, MARCH1, PPP2R1B, YWHAE	0.0101	0.0017	0.0261509	0.003
Cerebellum	AFF4, C7orf25, CENPC, DHX8, DNAJC17, RPL36AL, SAP18	0.0391	0.0002	0.0434444	0.000837209
Cerebellum	C1orf109, GIGYF1, KATNAL1, ZNF17	0.0166	0.0076	0.0261951	0.0096338
Cerebellum	FAM163A, GPC1, HLA-DRB5, YWHAE	0.0179	0.0017	0.0261951	0.003
Cerebellum	FGFR1, MRPL35, MRPL55, MRPS7, MTRF1L	0.0224	0.0008	0.0288	0.00182278
Cortex	ARRB1, ATXN2, GNMT, QSER1, TERF2IP, WWP2, YWHAE	0.0079	0	0.03	0
Cortex	ATXN2, BIRC7, BOLA2, NFKBIB, WWP2	0.0058	0.0002	0.0290909	0.000833333
Cortex	C21orf33, DUSP19, GLRX5, PITRM1	0.0235	0.0001	0.0459615	0.000454545
Cortex	ATXN2, BOLA2, PEBP1, STYX, WWP2	0.006	0.0003	0.0290909	0.00103448
Cortex	ATXN2, DNAJC18, PDIA4, SDF2L1, WWP2, YWHAE	0.0076	0	0.03	0
Cortex	NUP88, PXN, SOGA1, ZNF20	0.01	0.0013	0.0322581	0.00295455
Cortex	C21orf33, DUSP19, GLRX5, HEMK1, MTRF1L	0.0194	0.0001	0.0441304	0.000454545
Cortex	DFNA5, NUP88, PLEC, QSER1	0.0181	0.036	0.0441304	0.0473684
Cortex	GTF2H2, ZNF213, ZNF232, ZSCAN21	0.0162	0.0076	0.0441304	0.0133333
Cortex	ATXN2, BOLA2, FAM188B, PCM1, WWP2, YWHAE	0.0059	0	0.0290909	0
Cortex	GTF2H2, ZNF213, ZNF232	0.013	0.0236	0.0394118	0.0327778
Cortex	DERL1, RMDN3, SLC13A3, SRPR	0.0021	0.0001	0.0290909	0.000454545
Cortex	C21orf33, DUSP19, GLRX5, NDUFAF4	0.0131	0.0001	0.0394118	0.000454545
Cortex	ABL2, ATXN2, DERL1, HSPA8, WWP2	0.0047	0.0001	0.0290909	0.000454545
Cortex	ATXN2, BOLA2, CARM1, SUPT5H, WWP2	0.007	0.0006	0.0291667	0.00176471
Cortex	ATXN2, BOLA2, CPSF1, QSER1, WWP2	0.0051	0.0007	0.0290909	0.00194444
Cortex	ALDH16A1, CTU2, FAS, GPD1L	0.0244	0.0028	0.0460377	0.0056
Cortex	ATXN2, GIGYF1, SNRPC, WWP2	0.0053	0.0016	0.0290909	0.00355556
Cortex	ATXN2, BOLA2, EIF3E, FAM188B, WWP2	0.005	0	0.0290909	0
Cortex	DERL1, DNAJC18, LRPAP1, PXMP2, SRPR	0.0044	0.0003	0.0290909	0.00103448
Cortex	DERL1, EMC2, SFXN1, SRPR	0.0037	0	0.0290909	0
Cortex	ATXN2, BOLA2, EIF3E, MIIP, MLLT3, WWP2	0.0067	0.0008	0.0291304	0.00205128
Cortex	DPYSL4, HNF4A, MAPK3, SIRT6, SKP2	0.0217	0.0012	0.0442	0.0027907
Cortex	ATXN2, DRG2, EIF4A3, WWP2	0.0064	0.0001	0.0290909	0.000454545
Cortex	ATXN2, MKRN2, WNT11, WWP2	0.0036	0.0003	0.0290909	0.00103448
Cortex	GTF2H2, PGBD1, ZNF213, ZNF232, ZSCAN18, ZSCAN21	0.0211	0.0053	0.0442	0.01
Cortex	ATXN2, BOLA2, WWP2	0.004	0.0005	0.0290909	0.00151515
Cortex	GTF2H2, ZKSCAN3, ZNF213, ZNF232	0.0134	0.0193	0.0394118	0.0275714
Cortex	CNOT6L, CNOT8, NUP88, PXN, TBKBP1	0.0203	0.0135	0.0441304	0.0201493
Cortex	ATP5O, C21orf33, DUSP19, SFXN1	0.0175	0	0.0441304	0
Cortex	DERL1, HLA-B, HLA-C, SRPR, TMEM30A	0.0024	0.0089	0.0290909	0.0148333
Cortex	NUP88, PLEC, PXN, QSER1, SOGA1, ZNF20	0.0091	0.0008	0.0313793	0.00205128
Cortex	ATXN2, PARK2, PSMD8, WWP2	0.0054	0	0.0290909	0
Cortex	ARRB1, ATXN2, POLR1A, WWP2, YWHAE	0.0087	0	0.0310714	0
Cortex	DERL1, GIGYF1, SFXN1, SRPR, ZNF598	0.003	0	0.0290909	0
Cortex	HNF4A, MAPK3, RPIA, SIRT6, SNRNP27, WDR5B	0.0201	0.0167	0.0441304	0.0245588
Cortex	ARRB1, ATXN2, HNF4A, MAPK3, SIRT6, WWP2, YWHAE	0.0081	0	0.03	0
Cortex	HNF4A, MAPK3, SIRT6, STRN4, ZNF219	0.0195	0.0045	0.0441304	0.00865385
Cortex	ATXN2, BOLA2, SIRT6, SMC2, WWP2, YWHAE	0.0063	0	0.0290909	0
Cortex	GTF2H2, PLCG2, ZKSCAN7, ZNF213, ZNF232, ZSCAN21	0.0219	0.0081	0.0442	0.0137288
Cortex	HNF4A, MAPK3, NFYB, SIRT6, SP1	0.0145	0.0027	0.0414286	0.0055102
Cortex	C9orf89, HNF4A, MAPK3, SIRT6, SNRNP27	0.0188	0.0114	0.0441304	0.0175385
Cortex	C21orf33, DUSP19, GLRX5	0.0177	0.0001	0.0441304	0.000454545
Cortex	C18orf8, DERL1, PRSS56, SRPR, STK32C	0.003	0.0001	0.0290909	0.000454545
Cortex	PSMD13, PSMD8, STRN4	0.0221	0.0123	0.0442	0.0186364
Cortex	ATXN2, KIAA0232, SIRT6, WWP2, YWHAE	0.0038	0.0007	0.0290909	0.00194444
Cortex	SFXN1, TIMM10, TIMM13, UQCRFS1	0.0099	0.0004	0.0322581	0.00133333
Cortex	BSN, CNTROB, EME1, GIGYF1	0.0194	0.007	0.0441304	0.0125
Cortex	ATXN2, HLA-DRB5, WWP2, YWHAE	0.0044	0.0003	0.0290909	0.00103448
Cortex	ATXN2, DERL1, GTF2H2, HIST1H1C, WWP2	0.005	0.0003	0.0290909	0.00103448
Cortex	C21orf33, DUSP19, MCUR1, MUT, NDUFAF4	0.0168	0	0.0441304	0
Frontal Cortex BA9	ACAT1, DYRK1A, KDELC2, NIT2, S100A10, TTLL13	0.0083	0.0004	0.0229122	0.00128235
Frontal Cortex BA9	BTG1, DOCK7, DYRK1A, FBXW11, S100A10, TTLL13	0.0083	0	0.0229122	0
Frontal Cortex BA9	LAMB1, POLR2E, POLR3H	0.0151	0.0069	0.0288754	0.0109
Frontal Cortex BA9	CPSF1, QSER1, SIRT6, TARS2, UBR5	0.0117	0.0033	0.024525	0.00620172
Frontal Cortex BA9	AKIP1, BARD1, DYRK1A, S100A10, TTLL13	0.0149	0.0001	0.0288754	0.000519048
Frontal Cortex BA9	BTN2A1, C19orf44, HMGCR, TMEM223, UBC	0.006	0	0.0229122	0
Frontal Cortex BA9	CLPB, COQ9, MTCH2, SDR39U1, SNAP47	0.0156	0.0006	0.0293172	0.001635
Frontal Cortex BA9	AHNAK2, CBR1, DYRK1A, S100A10, SCN3B, SNAP47, STX6	0.0083	0	0.0229122	0
Frontal Cortex BA9	DYRK1A, EZH1, LIN52, S100A10, TTLL13	0.0093	0.0003	0.0229122	0.00105484
Frontal Cortex BA9	ANXA9, LYSMD1, STMN3, TRIM69	0.0214	0.0129	0.0348149	0.0171476
Frontal Cortex BA9	MTRF1L, SIRT6, TARS2, UBR5	0.0076	0.007	0.0229122	0.0109
Frontal Cortex BA9	HLA-B, HLA-G, NF2, RPL18A, SGSM3	0.0061	0.0004	0.0229122	0.00128235
Frontal Cortex BA9	HLA-B, LOXL4, NF2, PRMT6, RPL18A, SGSM3, WDFY3	0.0038	0	0.0229122	0
Frontal Cortex BA9	CTU2, THUMPD3, ZNF501	0.0211	0.0365	0.0348149	0.0422232
Frontal Cortex BA9	C1orf109, CDK3, KLC4, OBFC1, ORC3, STMN3, TADA2A, TEN1	0.0041	0.0356	0.0229122	0.0417247
Frontal Cortex BA9	CSGALNACT2, FAM213A, HLA-B, HLA-G, NF2, RPL18A, SGSM3	0.0013	0.0002	0.0229122	0.000807407
Frontal Cortex BA9	DYRK1A, PHF5A, S100A10, TTLL13	0.007	0.0008	0.0229122	0.00202791
Frontal Cortex BA9	LAMB1, POLR2E, POLR3E, POLR3H	0.0234	0.0135	0.0369652	0.0177289
Frontal Cortex BA9	BRD3, PRSS56, RNPS1, SIRT6, TBC1D26, UBR5	0.01	0.0008	0.0229122	0.00202791
Frontal Cortex BA9	HLA-B, HLA-H, NF2, RPL18A, SGSM3	0.0084	0.0001	0.0229122	0.000519048
Frontal Cortex BA9	CANX, ESYT2, HLA-B, NAT10, NF2, RPL18A, SGSM3	0.0183	0	0.0327	0
Frontal Cortex BA9	DYRK1A, HEXIM1, RAB43, S100A10, TTLL13	0.0125	0	0.0252315	0
Frontal Cortex BA9	BTN2A1, C19orf44, CBR1, HMGCR, UBC	0.004	0	0.0229122	0
Frontal Cortex BA9	HLA-B, NF2, RPL18A, RPL36AL, SGSM3	0.0072	0.0001	0.0229122	0.000519048
Frontal Cortex BA9	ADCK3, CLPB, COQ9, HLA-DQA1, SDR39U1, SLC22A18, SMPD2	0.0098	0.0002	0.0229122	0.000807407
Frontal Cortex BA9	BTN2A1, HMGCR, TYW1	0.0061	0.0005	0.0229122	0.00151389
Frontal Cortex BA9	CD40, SCN3B, TMEM128	0.015	0.0057	0.0288754	0.00927313
Frontal Cortex BA9	CEP250, DOCK7, DYRK1A, RPL18A, S100A10, TTLL13	0.0096	0	0.0229122	0
Frontal Cortex BA9	CACNG4, CSNK1E, LTBR, NBR1	0.0032	0.012	0.0229122	0.01635
Frontal Cortex BA9	EIF2A, HLA-B, NF2, RPL18A, RPS5, SGSM3	0.0116	0.0001	0.024525	0.000519048
Frontal Cortex BA9	CHI3L1, MTRF1L, SIRT6, TARS2, UBR5	0.0103	0.0032	0.0229122	0.0061193
Frontal Cortex BA9	APBB1IP, BAG6, PSMD4, SIRT6, UBR5	0.0169	0.0003	0.0307017	0.00105484
Frontal Cortex BA9	CD40, LAMB1, POLR2E, POLR2H, SCN3B, TMEM128	0.0096	0.0003	0.0229122	0.00105484
Frontal Cortex BA9	DOCK7, DYRK1A, S100A10, TTLL13	0.0125	0	0.0252315	0
Frontal Cortex BA9	DYRK1A, NUP50, NUP85, RNF169, S100A10, TTLL13	0.0088	0.0002	0.0229122	0.000807407
Frontal Cortex BA9	CD40, RIPK2, SCN3B, TMEM128	0.019	0.0097	0.0333921	0.0137312
Frontal Cortex BA9	COQ9, SDR39U1, SIRT6, TARS2, UBR5	0.0025	0.0007	0.0229122	0.00186098
Frontal Cortex BA9	AHNAK2, CBR1, DYRK1A, S100A10, SCN3B, STX6	0.0093	0	0.0229122	0
Frontal Cortex BA9	CLPB, COQ9, CSNK1E, SDR39U1, TEX264	0.0063	0.0006	0.0229122	0.001635
Frontal Cortex BA9	RNPS1, SIRT6, TBC1D26, UBR5	0.0049	0.0043	0.0229122	0.00755968
Frontal Cortex BA9	RABAC1, RIC8A, SCN3B, SNX15, TMEM128	0.0193	0.0037	0.0333921	0.00683559
Frontal Cortex BA9	RPIA, SIRT6, TARS2, TXN2, UBR5	0.0057	0.0088	0.0229122	0.0131397
Frontal Cortex BA9	KDELC2, SIRT6, TARS2, TUFM, UBR5	0.0093	0.0022	0.0229122	0.00470196
Frontal Cortex BA9	RABAC1, RIC8A, SCN3B, TMEM128	0.0203	0.0075	0.0345734	0.0115141
Frontal Cortex BA9	ANXA11, HLA-B, HLA-DRB5, HSPA5, SGSM3, VSIG8	0.0087	0	0.0229122	0
Frontal Cortex BA9	ABHD14A, ADCY2, DRD4, F2RL1, HDAC10, QSER1	0.0169	0.0182	0.0307017	0.0233388
Frontal Cortex BA9	ANXA11, HLA-B, HLA-DRB5, HSPA5, SGSM3	0.0101	0.0016	0.0229122	0.00371064
Frontal Cortex BA9	CLPB, COQ9, MFSD3, NMRAL1, POLDIP2, SDR39U1	0.0111	0.0027	0.024198	0.00555283
Frontal Cortex BA9	DOCK7, DYRK1A, LTV1, RPL18A, S100A10, STAU1, TTLL13	0.0101	0	0.0229122	0
Frontal Cortex BA9	CSNK1E, FARP2, LTBR, NBR1	0.0019	0.0117	0.0229122	0.016281
Frontal Cortex BA9	DEF8, HLA-B, NF2, RPL18A, SGSM3, WDFY3	0.0083	0.0002	0.0229122	0.000807407
Frontal Cortex BA9	DOCK7, DYRK1A, RPL18A, S100A10, STAU1, TTLL13	0.0094	0	0.0229122	0
Frontal Cortex BA9	ANXA11, CLEC18A, HLA-B, HLA-DRB5, HSPA5, SGSM3	0.0099	0.0013	0.0229122	0.00314889
Frontal Cortex BA9	CSNK1E, KIAA0101, LTBR, NBR1, TMEM259, TRIM4	0.0024	0.0091	0.0229122	0.0131947
Frontal Cortex BA9	RNPS1, SIRT6, TBC1D26, UBR5, ZNF660	0.0055	0.0046	0.0229122	0.00783437
Frontal Cortex BA9	ARPC5L, DYRK1A, S100A10, TTLL13	0.0058	0.0004	0.0229122	0.00128235
Frontal Cortex BA9	BTN2A1, C19orf44, HMGCR, LCN1, LTF, SNX27, UBC	0.0064	0.0001	0.0229122	0.000519048
Frontal Cortex BA9	CLPB, COQ9, SDR39U1, SIRT6, TARS2, UBR5	0.0022	0.0002	0.0229122	0.000807407
Frontal Cortex BA9	CBR1, MARCH2, SCN3B, TMEM128	0.0219	0.0009	0.0351044	0.00222955
Frontal Cortex BA9	ANXA11, CISD1, COQ9, HLA-DRB5, SDR39U1	0.007	0.0019	0.0229122	0.00422653
Frontal Cortex BA9	HLA-B, NF2, RPL18A, SGSM3	0.0103	0.0003	0.0229122	0.00105484
Frontal Cortex BA9	DYRK1A, GZF1, PARVA, RNF4, S100A10, TTLL13	0.0008	0	0.0229122	0
Frontal Cortex BA9	ACOT2, ALDH16A1, CLPB, COQ9, LRPPRC, SDR39U1	0.0064	0.0006	0.0229122	0.001635
Frontal Cortex BA9	CSNK1E, LTBR, NBR1, PCM1, TTLL5	0.0035	0.0029	0.0229122	0.00574727
Frontal Cortex BA9	CLPB, COQ9, CSNK1E, ESYT2, RHBDD1, SDR39U1, TEX264	0.007	0.0001	0.0229122	0.000519048
Frontal Cortex BA9	DHTKD1, MTRF1L, SIRT6, TARS2, UBR5	0.0062	0.0019	0.0229122	0.00422653
Frontal Cortex BA9	AKAP8, C1orf109, KLC4, STMN3, TADA2A	0.0212	0.0219	0.0348149	0.0271261
Frontal Cortex BA9	AHNAK2, DYRK1A, S100A10, TTLL13	0.009	0.0002	0.0229122	0.000807407
Frontal Cortex BA9	LAMB1, POLR1A, POLR2E, POLR3H	0.0277	0.0032	0.0425254	0.0061193
Putamen basal ganglia	HEATR1, HLA-B, HLA-H	0.0212	0.0244	0.0381382	0.0294349
Putamen basal ganglia	FN1, GSN, HADHB, PDHB, RNH1	0.0264	0.0006	0.0381382	0.0024
Putamen basal ganglia	CEP44, DIP2A, GNMT, PLEKHF2, SMG7	0.0125	0.015	0.0381382	0.019
Putamen basal ganglia	C10orf2, FN1, GSN, HADHB, TFAM	0.014	0.0004	0.0381382	0.00233846
Putamen basal ganglia	C10orf2, CGB2, HADHB, NDUFAF4, PITRM1, TFAM	0.0146	0.0002	0.0381382	0.00217143
Putamen basal ganglia	CHCHD4, HADHB, NDUFAF4, RALB, TIMM10	0.0258	0.0018	0.0381382	0.0044129
Putamen basal ganglia	CEP192, CNOT2, FBF1, GRAP2, SMG7, TRAF1	0.01	0.0006	0.0381382	0.0024
Putamen basal ganglia	FN1, GSN, NOS2, PSMD4, RNH1	0.024	0.003	0.0381382	0.00584615
Putamen basal ganglia	CEP44, DIP2A, SMG7, ZNF318	0.0226	0.0119	0.0381382	0.0170642
Putamen basal ganglia	BTN3A2, ERMP1, LYPD5, TMEM245, VIPR2	0.0268	0.0117	0.0381382	0.0170642
Putamen basal ganglia	GNAQ, GRAP2, LTBR, RGS2, TIGD5, TRAF1	0.005	0.0006	0.0381382	0.0024
Putamen basal ganglia	CEP192, FBF1, GRAP2, PCM1, SMG7, TRAF1	0.0078	0.0004	0.0381382	0.00233846
Putamen basal ganglia	NMNAT1, PICK1, SACS, TBC1D7	0.0106	0.0135	0.0381382	0.0176897
Putamen basal ganglia	FN1, GSN, PSMD4, RNH1, RPS28	0.0245	0.0009	0.0381382	0.00297391
Putamen basal ganglia	FN1, GSN, LYRM2, NDUFAF4, RNH1, TRAP1	0.0175	0.0027	0.0381382	0.00554595
Putamen basal ganglia	ERMP1, MPPE1, SUSD1, VIPR2	0.0145	0.0063	0.0381382	0.0111349
Putamen basal ganglia	C10orf2, COQ9, HADHB, NDUFAF4, TFAM	0.0061	0.0007	0.0381382	0.00253333
Putamen basal ganglia	FBXL17, FN1, GSN, KCTD10, SLC2A9, TKT, USP25	0.0217	0.0005	0.0381382	0.0024
Putamen basal ganglia	C10orf12, C10orf2, EHMT2, FN1, HADHB, TFAM	0.0197	0.0005	0.0381382	0.0024
Putamen basal ganglia	CDC42EP4, HADHB, RALB, YBEY	0.0251	0.0023	0.0381382	0.00514118
Putamen basal ganglia	CEP44, DIP2A, FBXL17, SMG7, ZBTB46, ZNF318	0.0178	0.011	0.0381382	0.01672
Putamen basal ganglia	ERMP1, LYPD5, VIPR2	0.0148	0.0107	0.0381382	0.0165959
Putamen basal ganglia	ATPAF2, FN1, GSN, RPIA, SLC2A9, TKT	0.0185	0.0001	0.0381382	0.00152
Putamen basal ganglia	ENAH, FYCO1, PRMT6, SMG7	0.0212	0.0081	0.0381382	0.01368
Putamen basal ganglia	CDC42EP4, HADHB, HRAS, PPFIBP2, RALB	0.0171	0.0012	0.0381382	0.00350769
Putamen basal ganglia	CLSTN1, ERMP1, LYPD5, VIPR2	0.0205	0.004	0.0381382	0.00741463
Putamen basal ganglia	ADHFE1, GNAQ, LTBR, RGS2, TIGD5	0.0088	0.0102	0.0381382	0.01615
Putamen basal ganglia	FN1, FYCO1, GSN, POLR2E, RNH1, RPA2	0.0237	0.0004	0.0381382	0.00233846
Putamen basal ganglia	HLA-B, HLA-C, HLA-H, TMEM223	0.0295	0.0129	0.0386552	0.0174667
Putamen basal ganglia	CEP44, DIP2A, SMG7	0.0202	0.0147	0.0381382	0.0189356
Putamen basal ganglia	C10orf2, FN1, HADHB, RALB, TFAM	0.0124	0.0003	0.0381382	0.00228
Putamen basal ganglia	C10orf2, FN1, GSN, HADHB, LRPPRC	0.0166	0.0001	0.0381382	0.00152
Putamen basal ganglia	CCDC124, DLD, FN1, GSN, RNH1	0.0174	0.0017	0.0381382	0.0044129
Putamen basal ganglia	DPP9, FN1, GSN, SLC2A9, TKT, TMCO6	0.0204	0	0.0381382	0
Putamen basal ganglia	HLA-B, HLA-C, HLA-H, MAPK8IP2, TMEM128, TMEM223	0.0292	0.0078	0.0386552	0.0134727
Putamen basal ganglia	ACADM, C10orf2, CCT6B, FYCO1, NDUFAF4, TSFM	0.017	0.0015	0.0381382	0.00407143
Putamen basal ganglia	FN1, GSN, NOS2, PSMD4, RNH1, TNFAIP2	0.0174	0.0012	0.0381382	0.00350769
Putamen basal ganglia	ACOT1, C10orf2, FN1, GSN, HADHB, TFAM	0.0141	0.0002	0.0381382	0.00217143
Putamen basal ganglia	C10orf2, CEBPZ, FN1, HADHB, MNDA, TFAM, WDR75	0.0162	0	0.0381382	0
Putamen basal ganglia	CEP44, DIP2A, RING1, SMG7, ZBTB38	0.0121	0.013	0.0381382	0.0174667
Putamen basal ganglia	NMNAT1, PICK1, TBC1D7, TRIM73, TTC23	0.0152	0.0198	0.0381382	0.0246689
Putamen basal ganglia	FN1, GSN, RNH1, RPS28	0.027	0.0019	0.0381382	0.0045125
Putamen basal ganglia	NMNAT1, PICK1, RPIA, SLC2A9, TBC1D7, TKT	0.0082	0	0.0381382	0
Putamen basal ganglia	FN1, GSN, SLC2A9, TKT	0.0173	0.0006	0.0381382	0.0024
Putamen basal ganglia	C10orf2, CCDC69, NDUFAF4, PSMG4, TOP3A, TSFM	0.0144	0.005	0.0381382	0.00904762
Putamen basal ganglia	CDC42EP4, GRIP1, WDR6	0.0274	0.0131	0.0381382	0.0174667
Putamen basal ganglia	EMC1, ERMP1, HADHB, RALB	0.0156	0.0025	0.0381382	0.00527778
Putamen basal ganglia	FN1, GSN, NOV, RNH1, RPS28	0.0224	0.001	0.0381382	0.00316667
Putamen basal ganglia	BOD1L1, MRE11A, NEK1, POLR2E, TRIM29	0.0214	0.0028	0.0381382	0.0056
Putamen basal ganglia	C10orf2, FN1, HADHB, NDUFAF4, TFAM	0.0116	0.0003	0.0381382	0.00228
Putamen basal ganglia	CCDC8, HEATR1, HLA-B, HLA-H, POLR2E, TUBB3	0.0276	0.0025	0.0381382	0.00527778
Putamen basal ganglia	C10orf2, CLPP, FOXRED1, HADHB, NDUFAF4, TFAM	0.0113	0.0009	0.0381382	0.00297391
Putamen basal ganglia	FN1, GSN, PSMG1, RNH1, RPS28	0.0237	0.0014	0.0381382	0.00394074
Putamen basal ganglia	CAMSAP1, CEP44, DIP2A, SMG7	0.0237	0.0116	0.0381382	0.0170642
Putamen basal ganglia	FN1, GSN, HADHB, RNH1, VDAC2	0.0269	0.0007	0.0381382	0.00253333
Putamen basal ganglia	ERMP1, TMEM223, UPK1A, VIPR2	0.0214	0.0032	0.0381382	0.00608
Putamen basal ganglia	FN1, GSN, HIST1H4C, RNH1, RPS28	0.0283	0.002	0.0384071	0.00460606
Spinal cord cervical c-1	HIST1H3A, JMJD6, KAT7, RSRC1, SP110, YWHAG	0.0018	0	0.00963529	0
Spinal cord cervical c-1	BMP7, GNB2, SERINC1, TDGF1	0.0045	0.009	0.01575	0.02275
Spinal cord cervical c-1	HIST1H3A, JMJD6, MCM8, MSH2, RSRC1, YWHAG	0.0071	0	0.0195788	0
Spinal cord cervical c-1	ASRGL1, BICD2, C2CD3, LTBR, MAP4K4, TAB1	0.0002	0.0034	0.002275	0.0212333
Spinal cord cervical c-1	BMP7, GNB2, GRB7, MTUS1, SERINC1, TDGF1, TRIM36	0.0143	0.0125	0.0282891	0.0253638
Spinal cord cervical c-1	LTBR, MAP4K4, TRAF1, TRIM4, ZNF23	0	0.0101	0	0.0229775
Spinal cord cervical c-1	C2CD3, CNTRL, LTBR, MAP4K4, TRAF1	0.0006	0.0077	0.0042	0.0212333
Spinal cord cervical c-1	MRPL20, MTRF1L, NDUFAF4	0.0074	0.0249	0.0198059	0.0371339
Spinal cord cervical c-1	IQCB1, LOX, LTBR, MAP4K4, TRAF1, ZNF23	0.0003	0.013	0.002275	0.0253638
Spinal cord cervical c-1	BMP7, GNB2, GRB7, SERINC1, TDGF1	0.0108	0.0056	0.0234	0.0212333
Spinal cord cervical c-1	C19orf44, C2CD3, CCDC85C, CNTRL, LTBR, MAP4K4, PRPH	0.0003	0.0061	0.002275	0.0212333
Spinal cord cervical c-1	C2CD3, CNTRL, MAP4K4, MGST3, PLD6, WDR41	0	0.0056	0	0.0212333
Spinal cord cervical c-1	CARD9, FAM118A, LNX1	0.0024	0.0003	0.0114947	0.0034125
Spinal cord cervical c-1	HIST1H3A, JMJD6, KCTD15, MYLK2, NME1, NME1-NME2, RSRC1, YWHAG	0.0041	0	0.0155458	0
Spinal cord cervical c-1	ASRGL1, BAG2, METTL21B, SP110, TAB1	0.0159	0.0006	0.0297143	0.00606667
Spinal cord cervical c-1	C2CD3, COMMD2, PCM1, SP110, TTC12	0.0128	0.0033	0.0258844	0.0212333
Spinal cord cervical c-1	ANO7, CISD3, MRPL20, MRPS10, MTRF1L, NDUFAF4	0.0071	0.0245	0.0195788	0.0371339
Spinal cord cervical c-1	C2CD3, CNTRL, MGST3, NUP107, NUP85, WDR41	0.0028	0.005	0.0121333	0.0212333
Spinal cord cervical c-1	ARL6IP5, CERS6, LETMD1, PIGM, UPK1A	0.029	0.0069	0.0497925	0.0212333
Spinal cord cervical c-1	HIST1H3A, INTS1, JMJD6, RSRC1, YWHAG	0.008	0	0.0208	0
Spinal cord cervical c-1	CARD9, FAM118A, GRWD1, LNX1	0.0037	0.0001	0.0153045	0.0013
Spinal cord cervical c-1	C2CD3, CCDC85C, CNTRL, LTBR, MAP4K4	0.0001	0.0067	0.002275	0.0212333
Spinal cord cervical c-1	C2CD3, CNTRL, MAP4K4, MGST3, WDR41	0.0001	0.0071	0.002275	0.0212333
Spinal cord cervical c-1	MRPL20, MTRF1L, NDUFAF4, PDPR	0.0088	0.0148	0.0216432	0.0274857
Spinal cord cervical c-1	AJAP1, CTNNB1, HIST1H3A, JMJD6, RSRC1, YWHAG	0.0119	0	0.0246114	0
Spinal cord cervical c-1	DARS2, DPYSL5, MRPL20, MTRF1L, NDUFAF4, YBEY	0.0055	0.0101	0.0172586	0.0229775
Spinal cord cervical c-1	ARL6IP5, BTN2A1, FAM134B, HSD17B11, POR, WDR41	0.0044	0.0028	0.01575	0.0212333
Spinal cord cervical c-1	ARL6IP5, DEPDC1B, FAM134B, HSD17B11, SIPA1L1, WDR41	0.0012	0.0048	0.006825	0.0212333
Spinal cord cervical c-1	C2CD3, CCDC67, CEP192, CNTRL, LTBR, MAP4K4	0.0003	0.0094	0.002275	0.0229775
Spinal cord cervical c-1	ANO7, CHCHD10, CHCHD4, CISD3, NDUFAF4, TIMM10	0.0106	0.0331	0.0234	0.0442956
Spinal cord cervical c-1	JPH1, LNP1, LTBR, LYN, MAP4K4, NUMB	0.0002	0.0115	0.002275	0.0243372
Spinal cord cervical c-1	ANO7, CHCHD10, CISD3, COX5A, MRPL20, MTRF1L, NDUFAF4	0.0064	0.0101	0.0187871	0.0229775
Spinal cord cervical c-1	ANO7, GFM1, MRPL20, NDUFAF4, YBEY	0.0039	0.0108	0.0154304	0.0234
Spinal cord cervical c-1	ARSJ, LTBR, MAP4K4, TRAF1, ZNF23	0.0003	0.0076	0.002275	0.0212333
Spinal cord cervical c-1	HRAS, LTBR, MAP4K4, NUMB, PROM2, TRAF1	0.0007	0.0264	0.00455	0.0375375
Spinal cord cervical c-1	ANO7, D2HGDH, GFM1, MRPL20, TBCB, YBEY	0.0021	0.0225	0.0106167	0.0359293
Spinal cord cervical c-1	LTBR, MAP4K4, TRAF1, ZNF23	0.0002	0.0126	0.002275	0.0253638
Spinal cord cervical c-1	ARL6IP5, FAM134B, HSD17B11, JPH1, WDR41	0.0027	0.0018	0.0121333	0.01638
Spinal cord cervical c-1	ANO7, CHCHD10, CHCHD4, CISD3, LACTB, NDUFAF4, UBXN2B	0.0087	0.0308	0.0216432	0.0424667
Spinal cord cervical c-1	DIRAS3, LTBR, MAP4K4, NUMB, TC2N, TRAF1	0.001	0.0073	0.00606667	0.0212333
Spinal cord cervical c-1	C2CD3, CCDC67, CEP192, CNOT6L, CNTRL, MAP4K4	0.0049	0.0044	0.0165148	0.0212333
Spinal cord cervical c-1	COMMD2, METTL21B, TIPRL	0.016	0.008	0.0297143	0.02132
Spinal cord cervical c-1	DIRAS3, FEZ2, LTBR, MAP4K4, NUMB, TRAF1	0.0003	0.0155	0.002275	0.0276569
Spinal cord cervical c-1	HIST1H3A, JMJD6, KDM1A, PSORS1C2, RSRC1, TTC23, YWHAG	0.0099	0	0.0229775	0
Spinal cord cervical c-1	ACOT2, MLYCD, MRPL20, MTRF1L, NDUFAF4, PEX5	0.0055	0.0082	0.0172586	0.02132
Spinal cord cervical c-1	MRPL18, MRPL20, MTRF1L, NDUFAF4	0.0095	0.0227	0.02275	0.0359293
Substantia nigra	ANO5, CANX, CNTNAP2, ERLIN1, PTGIR	0.0136	0.0007	0.031476	0.00301
Substantia nigra	FTL, GNPDA2, NUDT14, WDYHV1	0.0284	0.0016	0.0384313	0.00487333
Substantia nigra	GCSH, NFATC1, NIT2, NME1, NME3, PRDX6, TUBA1A, VARS	0.0001	0.0027	0.000716667	0.00645
Substantia nigra	CDKN2AIPNL, LTBR, MOBP, TRAF1, TRIM4, WAC	0.0125	0.0126	0.031476	0.0215
Substantia nigra	CD3EAP, GRWD1, POLR2E	0.0115	0	0.031476	0
Substantia nigra	MGAT5B, MOBP, TENC1, VARS, WAC, ZNF575	0.0203	0.0085	0.0335731	0.0152292
Substantia nigra	CD3EAP, GRWD1, POLR2E, PRPF6	0.0058	0	0.02494	0
Substantia nigra	ELOVL4, SERF1A, SERF1B, TM2D3, TMEM128	0.0165	0.0152	0.031476	0.0226862
Substantia nigra	FAT1, NOS2, PSMD13, PTPLAD1, RECK, SPSB2	0.0142	0.0011	0.031476	0.00394167
Substantia nigra	CSGALNACT2, NFATC1, SATB1, SLC35E3, SPG21	0	0.0003	0	0.0016125
Substantia nigra	CMTR2, FBXO7, PRAME, TSLP	0.027	0.0043	0.0384313	0.00840455
Substantia nigra	FTL, NUDT14, WDYHV1	0.0286	0.0005	0.0384313	0.00238889
Substantia nigra	CYB561, GGA1, SLC38A7, TM2D3, TMEM128	0.0238	0.031	0.03655	0.0416562
Substantia nigra	AMACR, FAT1, NOS2, PEX5, PSMD13, PTPLAD1	0.0183	0.0008	0.031476	0.00312727
Substantia nigra	HLA-H, NFATC1, TUBA1A	0.0002	0.0037	0.001075	0.00757619
Substantia nigra	MUTYH, NFATC1, NME4, SATB1, SPG21, TUBA1A	0.0002	0.0002	0.001075	0.00122857
Substantia nigra	LTBR, MOBP, TRAF1, TRIM4, WAC	0.0116	0.0183	0.031476	0.0253839
Substantia nigra	GIGYF1, LATS2, RASSF1	0.0164	0.0031	0.031476	0.00701579
Substantia nigra	CTSZ, MGAT5B, MOBP, TENC1, VARS, WAC, ZNF575	0.0306	0.013	0.0398727	0.0215
Substantia nigra	NFATC1, NME1, NME3, TUBA1A, VARS	0	0.0022	0	0.00556471
Substantia nigra	C1GALT1, ELOVL4, SERF1B, TM2D3, TMEM128	0.0177	0.0171	0.031476	0.02451
Substantia nigra	FOXD4, PPP2R1B, PRAME	0.0263	0.0146	0.0384313	0.0226862
Substantia nigra	CNTNAP2, CSGALNACT2, IQCB1, NFATC1, TUBA1A	0	0	0	0
Substantia nigra	B3GAT1, HLA-C, HLA-H, NFATC1, TUBA1A	0.0005	0.0064	0.00238889	0.0119652
Substantia nigra	FAT1, NOS2, PSMD13, PTPLAD1	0.012	0.0013	0.031476	0.0043
Substantia nigra	LTBR, NFATC1, SATB1, SPG21, TRAF1, TRIM4	0	0.0001	0	0.000716667
Substantia nigra	ELOVL4, SERF1B, TM2D3, TMEM128	0.0174	0.0153	0.031476	0.0226862
Substantia nigra	AP3M1, NFATC1, TUBA1A	0	0.0017	0	0.00487333
Substantia nigra	BARD1, CD3EAP, GRWD1, LUC7L3, POLR2E	0.0137	0	0.031476	0
Substantia nigra	CD40, LTBR, TM2D3, TMEM128, TRAF1, TRIM4	0.0151	0.0035	0.031476	0.007525
Substantia nigra	CD3EAP, GRWD1, MRPL20, POLR2E, RPL13	0.0132	0	0.031476	0
Nucleus accumbens basal ganglia	CBR1, TXNL4A, UNK, UPF1	0.0299	0.0001	0.0427095	0.00042
Nucleus accumbens basal ganglia	C1orf86, CDC42BPB, INCA1, SPAG8, UBXN2B	0.0173	0	0.0361271	0
Nucleus accumbens basal ganglia	LRP4, MRPL34, MRPL50, TST	0.0154	0.0003	0.0361271	0.000984375
Nucleus accumbens basal ganglia	ERMP1, TRPM4, UPK1A	0.0071	0.0093	0.0361271	0.0113547
Nucleus accumbens basal ganglia	ASB13, CPSF3L, GIGYF1, OXER1, SPAG8	0.0191	0	0.0361271	0
Nucleus accumbens basal ganglia	ACSF2, GIGYF1, METTL15, NDUFAF4, PITRM1, SPAG8	0.0116	0	0.0361271	0
Nucleus accumbens basal ganglia	APC2, CTNNB1, TXNL4A, UNK, UPF1	0.0145	0	0.0361271	0
Nucleus accumbens basal ganglia	EXOSC3, HLTF, NXF1, PGD, RWDD3	0.0188	0.0002	0.0361271	0.00075
Nucleus accumbens basal ganglia	POLR1A, POLR2D, POLR2E	0.0138	0.0049	0.0361271	0.00659615
Nucleus accumbens basal ganglia	SLC25A3, TXNL4A, UNK, UPF1	0.0277	0.0004	0.0409648	0.00123529
Nucleus accumbens basal ganglia	CDK10, FBXO7, HLA-B, HLA-H, PSMA4, UXS1	0.0381	0.003	0.0481988	0.00456522
Nucleus accumbens basal ganglia	ABHD15, ACTR8, C7orf43, FHL2, VWC2, YY1	0.0329	0.0035	0.0442885	0.00496622
Nucleus accumbens basal ganglia	CDH1, NLRP2, POLR2D, POLR2E, SNX2	0.0095	0.002	0.0361271	0.00368421
Nucleus accumbens basal ganglia	ACSF2, NDUFAF4, PITRM1	0.0107	0.0018	0.0361271	0.00356604
Nucleus accumbens basal ganglia	EHMT2, KLF6, MYOM2	0.0301	0.0391	0.0427095	0.0414697
Nucleus accumbens basal ganglia	BTN2A2, CHRND, FAM213A, HLA-DRB1, HLA-DRB5	0.0186	0.0108	0.0361271	0.0128864
Nucleus accumbens basal ganglia	BSND, CSGALNACT2, FAM213A, HLA-B, HLA-C, HLA-H, UXS1	0.0183	0.0061	0.0361271	0.00781098
Nucleus accumbens basal ganglia	CDH1, NAV2, NLRP2, POLR2D, POLR2E, SNX2	0.0105	0.0014	0.0361271	0.003
Nucleus accumbens basal ganglia	CLCC1, HLA-B, TCTN2, UXS1, WDR41	0.0288	0.002	0.042	0.00368421
Nucleus accumbens basal ganglia	CDK2, PGD, TXNL4A, UNK, UPF1	0.0345	0.0001	0.0449815	0.00042
Nucleus accumbens basal ganglia	EXOSC3, HLTF, NXF1, PGD	0.0199	0.0007	0.0361271	0.0017093
Nucleus accumbens basal ganglia	BTN2A2, FAM189B, HLA-DRB1, HLA-DRB5	0.0277	0.0122	0.0409648	0.0139239
Nucleus accumbens basal ganglia	EHMT2, FHL2, L3MBTL2, MYOM2, POGZ	0.0245	0.0025	0.0389773	0.00410156
Nucleus accumbens basal ganglia	CDK2, GLG1, PGD, UNK, UPF1	0.02	0.0002	0.0361271	0.00075
Nucleus accumbens basal ganglia	COG4, RPS20, TXNL4A, UNK, UPF1	0.0145	0	0.0361271	0
Nucleus accumbens basal ganglia	LRRK2, PEBP1, SERF1A, TTLL1	0.0052	0.0009	0.0361271	0.0021
Nucleus accumbens basal ganglia	FAM213A, HLA-B, HLA-C, HLA-H, UXS1	0.0174	0.014	0.0361271	0.0156383
Nucleus accumbens basal ganglia	EXOSC3, HLTF, MYC, NFXL1	0	0.0001	0	0.00042
Nucleus accumbens basal ganglia	RAB14, TXNL4A, UNK, UPF1	0.0311	0	0.0433636	0
Nucleus accumbens basal ganglia	RTN4, SNX2, TXNL4A, UNK, UPF1	0.0172	0	0.0361271	0
Nucleus accumbens basal ganglia	ACSF2, APEX1, RAB43, UBAC2, ZKSCAN8	0.0116	0.0001	0.0361271	0.00042
Nucleus accumbens basal ganglia	POLR1A, POLR2D, POLR2E, UVSSA	0.0158	0.003	0.0361271	0.00456522
Nucleus accumbens basal ganglia	BTN2A2, HLA-DRB1, HLA-DRB5	0.0171	0.0208	0.0361271	0.02275
Nucleus accumbens basal ganglia	DCDC2, FAM118A, GINM1, GLG1, HLA-F, NMU	0.0229	0.0064	0.0375703	0.00809639
Nucleus accumbens basal ganglia	GTF2H2, HIST1H1C, LRRK2, SERF1A, TTLL1	0.0062	0.001	0.0361271	0.00223404
Nucleus accumbens basal ganglia	TXNL4A, UNK, UPF1	0.0366	0.0001	0.0468659	0.00042
Nucleus accumbens basal ganglia	DCDC2, FAM118A, NMU	0.0249	0.013	0.0390224	0.0146774
Nucleus accumbens basal ganglia	CARD8, CORO6, L3MBTL2, PCGF6, TRIOBP	0.0315	0.0071	0.0433636	0.008875
Nucleus accumbens basal ganglia	ACSF2, MTRF1L, NDUFAF4, PITRM1	0.0111	0.002	0.0361271	0.00368421
Nucleus accumbens basal ganglia	LRP4, MRPL34, MRPL35, MRPL50, TST	0.0203	0	0.0361271	0
Nucleus accumbens basal ganglia	LRP4, MRPL34, MRPL50, TST, ZNF669	0.0228	0.0003	0.0375703	0.000984375
Nucleus accumbens basal ganglia	ACKR3, ESPL1, EXOSC3, HLTF, NXF1, PGD	0.0164	0.0002	0.0361271	0.00075
Nucleus accumbens basal ganglia	NUP50, POLR1A, POLR2D, POLR2E, SUPT5H, ZSCAN18	0.0127	0.0022	0.0361271	0.00378689
Nucleus accumbens basal ganglia	CDC42EP3, LRRK2, SERF1A, TTLL1	0.0069	0.0005	0.0361271	0.00134615
Nucleus accumbens basal ganglia	LRRK2, SERF1A, TTLL1	0.0032	0.0021	0.0361271	0.00373729
Nucleus accumbens basal ganglia	ACSF2, APEX1, RAB43, UBAC2	0.0124	0.0005	0.0361271	0.00134615
Nucleus accumbens basal ganglia	HADHB, SLC25A3, TXNL4A, UNK, UPF1	0.0239	0	0.0386077	0
Nucleus accumbens basal ganglia	BAG6, NOMO1, RAB14, TXNL4A, UNK, UPF1	0.0347	0	0.0449815	0
Nucleus accumbens basal ganglia	ACSF2, GCSH, NMI, PSMG3	0.0197	0	0.0361271	0
Nucleus accumbens basal ganglia	CAV1, COG4, KEAP1, PAQR3, PGD	0.0183	0.0029	0.0361271	0.00454478
Nucleus accumbens basal ganglia	ACSF2, APEX1, RAB43, THOC3, UBAC2	0.0141	0.0001	0.0361271	0.00042
Nucleus accumbens basal ganglia	POLR1A, POLR2D, POLR2E, SUPT5H	0.0103	0.005	0.0361271	0.00664557
Nucleus accumbens basal ganglia	FBXO25, IRS1, KHDRBS1, LRRK2, PSMD4, SERF1A, TTLL1	0.0082	0.0007	0.0361271	0.0017093
Nucleus accumbens basal ganglia	BTN2A2, FAM189B, HLA-DRB1, HLA-DRB5, PDZD8	0.0318	0.0059	0.0433636	0.00764815
Nucleus accumbens basal ganglia	GTF2H2, GTF2H5, TXNL4A, UNK, UPF1	0.0162	0	0.0361271	0
Nucleus accumbens basal ganglia	BET1L, CAV1, COG4, PGD	0.0095	0.0038	0.0361271	0.00525
Nucleus accumbens basal ganglia	CDK2, NOMO1, PGD, TIMM10, UNK, UPF1	0.0178	0	0.0361271	0
Nucleus accumbens basal ganglia	AP4M1, MED31, POLR1A, POLR2D, POLR2E	0.0218	0.0044	0.0369194	0.006
Nucleus accumbens basal ganglia	BSND, CAV1, COG4, PDZK1IP1, PGD, VAMP3	0.0116	0.0034	0.0361271	0.00489041
Nucleus accumbens basal ganglia	LRRK2, PSMD4, SERF1A, TTLL1	0.0049	0.0021	0.0361271	0.00373729
Nucleus accumbens basal ganglia	ARAP3, CDH1, GGA3, NLRP2, SNX2	0.0172	0.0005	0.0361271	0.00134615
Nucleus accumbens basal ganglia	HLA-B, HLA-H, UXS1	0.0194	0.0206	0.0361271	0.02275
Nucleus accumbens basal ganglia	ARNT, NPAS4, RTN4, SNX2, TXNL4A, UNK	0.0208	0	0.0364	0
Nucleus accumbens basal ganglia	C1orf86, GIGYF1, INCA1, SPAG8	0.0146	0.0005	0.0361271	0.00134615
Nucleus accumbens basal ganglia	GTF2H2, HIST1H1C, HPCAL4, LRRK2, TTC12, TTLL1	0.0129	0.0015	0.0361271	0.00315
Nucleus accumbens basal ganglia	LTBR, SSC5D, TNFSF14, TRAF1	0.0062	0.0025	0.0361271	0.00410156
Nucleus accumbens basal ganglia	CARD8, CEP192, CNOT6L, TXNL4A, UNK, UPF1	0.0342	0	0.0449815	0
Nucleus accumbens basal ganglia	ANAPC4, LNP1, LRRK2, SERF1A, TTLL1	0.0062	0.0037	0.0361271	0.00518
Nucleus accumbens basal ganglia	CDCA3, LTBR, SSC5D, TNFSF14, TRAF1	0.0067	0.0031	0.0361271	0.00465
Nucleus accumbens basal ganglia	CAV1, COG4, NOS2, PGD, PSMA4	0.019	0.002	0.0361271	0.00368421
Nucleus accumbens basal ganglia	PLOD2, POLR1A, POLR2D, POLR2E, SUPT5H	0.0112	0.0027	0.0361271	0.00436154
Nucleus accumbens basal ganglia	FAM213A, HLA-B, HLA-C, HLA-F, HLA-H, UXS1	0.0213	0.011	0.0366639	0.0129775
Nucleus accumbens basal ganglia	EXOSC3, HLTF, NXF1, PGD, UNC119B	0.0188	0.0004	0.0361271	0.00123529
Nucleus accumbens basal ganglia	RTN4, SNX2, TMEM128, TXNL4A, UNK	0.0131	0	0.0361271	0
Nucleus accumbens basal ganglia	ACSF2, APEX1, C7orf43, RAB43, TGM1, UBAC2	0.0114	0.0006	0.0361271	0.00153659
Nucleus accumbens basal ganglia	C4orf32, RTN4, SNX2, TXNL4A, UNK	0.0159	0.0003	0.0361271	0.000984375
Nucleus accumbens basal ganglia	CHD1L, HLTF, LRRK2, SERF1A, TTLL1	0.0067	0.0001	0.0361271	0.00042
Nucleus accumbens basal ganglia	IQCB1, PGD, RAB14, TXNL4A, UNK, UPF1	0.0269	0	0.0409348	0
Nucleus accumbens basal ganglia	CDH1, EHD4, NLRP2, POLR2D, POLR2E, SNX2	0.0108	0.0005	0.0361271	0.00134615
Nucleus accumbens basal ganglia	BET1L, CAV1, COG4, PGD, STX18	0.011	0.0017	0.0361271	0.00343269
Nucleus accumbens basal ganglia	ACSF2, NDUFAF4, PGD, PITRM1, TRAP1	0.0095	0.001	0.0361271	0.00223404
Nucleus accumbens basal ganglia	EHMT2, FHL2, MYOM2, POGZ, ZNF626	0.0259	0.0022	0.0399926	0.00378689
Nucleus accumbens basal ganglia	CDC42BPB, LRRK2, RIPK1, SERF1A, TTLL1	0.0069	0.0003	0.0361271	0.000984375

## Sheet: Whites
Tissue	Gene Modules for Hispanic population	Raw p-value in Hispanic population	Raw p-value in White population	FDR Adjusted p-value in Hispanic population	FDR Adjusted p-value in White population
Anterior cingulate cortex BA24	ALDH5A1, HSCB, MPRIP, NFXL1, POLR2E, RPA3, VEZT	0	0	0	0
Anterior cingulate cortex BA24	COG4, CROCC, PEX14, PTPRS, TUBB2A	0	0.0054	0	0.017928
Anterior cingulate cortex BA24	RMDN3, SLC13A3, TMEM216, VEZT	0.0007	0.0021	0.00161389	0.017928
Anterior cingulate cortex BA24	PSMG4, PTPRS, SIRT6, TUBB2A	0.0005	0.004	0.00133871	0.017928
Anterior cingulate cortex BA24	CAPZA1, MARK2, PARD6G, PTPRS, SIRT6, TUBB2A	0	0.005	0	0.017928
Anterior cingulate cortex BA24	C1orf109, TEAD4, TRIM54, ZNF667-AS1	0.0003	0.0053	0.000922222	0.017928
Anterior cingulate cortex BA24	AHSA2, ARHGAP12, DDX58, SLC16A3, SLC1A6	0.0002	0.004	0.000691667	0.017928
Anterior cingulate cortex BA24	CHIT1, HIST1H1C, KRI1, WDR61, ZC3H3	0.0002	0.0106	0.000691667	0.0274938
Anterior cingulate cortex BA24	ALDH5A1, HSCB, MRPL35, NFXL1, VEZT	0	0	0	0
Anterior cingulate cortex BA24	COG4, PEX14, PTPRS, SIRT6, TUBB2A	0	0.0023	0	0.017928
Anterior cingulate cortex BA24	AHSA2, ARHGAP12, DDX58, GIPC3, PLEKHA2, SLC1A6	0	0.0044	0	0.017928
Anterior cingulate cortex BA24	PTPRS, SIRT6, TUBB2A	0.0004	0.0024	0.00118571	0.017928
Anterior cingulate cortex BA24	ABCG8, CAV2, MPRIP, NUPR1, PRPF4, PTGR2	0	0.006	0	0.0191538
Anterior cingulate cortex BA24	ALDH5A1, BPHL, HSCB, MTHFD1L, NFXL1, VEZT	0	0	0	0
Anterior cingulate cortex BA24	CAPZA1, PTPRS, SIRT6, TUBB2A	0.0002	0.0034	0.000691667	0.017928
Anterior cingulate cortex BA24	C1orf109, MKRN2, PTPRS, SIRT6, TUBB2A	0.0001	0.0027	0.000415	0.017928
Anterior cingulate cortex BA24	AHSA2, AMT, ARHGAP12, DDX58, SLC1A6	0.0006	0.0037	0.00150909	0.017928
Anterior cingulate cortex BA24	AHSA2, ARHGAP12, DDX58, MON1B, SLC1A6	0.0006	0.0047	0.00150909	0.017928
Anterior cingulate cortex BA24	ABCE1, HIST1H1C, PEBP1, SLC16A3, TMEM216, VEZT, WDR61	0	0.0063	0	0.0193667
Anterior cingulate cortex BA24	ABCE1, GNAQ, HIST1H1C, NUFIP1, TMEM216, VEZT, WDR61	0.0001	0.0054	0.000415	0.017928
Anterior cingulate cortex BA24	ATP10B, CHIT1, GRWD1, HIST1H1C, NSUN2, PHACTR3, WDR61	0.0003	0.0209	0.000922222	0.0495629
Anterior cingulate cortex BA24	CRK, DOCK1, PTPRS, SIRT6, TUBB2A	0.0001	0.0054	0.000415	0.017928
Anterior cingulate cortex BA24	COG4, CROCC, GAN, PEX14, PTPRS, SEMA5B, TUBB2A	0	0.0048	0	0.017928
Anterior cingulate cortex BA24	FBXO7, PTPRS, SCARA5, SLC35B3, TUBB2A	0.0003	0.0087	0.000922222	0.02407
Anterior cingulate cortex BA24	AHSA2, ARHGAP12, DDX58, IFITM2, SLC1A6	0.0001	0.0044	0.000415	0.017928
Anterior cingulate cortex BA24	AHSA2, ARHGAP12, DDX58, SLC1A6, SLC25A39	0	0.0027	0	0.017928
Anterior cingulate cortex BA24	C1orf109, EIF4H, SPG21, TRIM54, ZNF667-AS1	0.0002	0.007	0.000691667	0.02075
Anterior cingulate cortex BA24	ABHD17B, CD79B, COMMD2, D2HGDH, P2RX2, TRIM16L	0.0275	0.0094	0.0351154	0.0251677
Anterior cingulate cortex BA24	AIMP1, CEP135, CEP192, CNOT6L, GCSH, SFI1	0	0.0044	0	0.017928
Anterior cingulate cortex BA24	BTN2A2, CD53, HLA-DRB1, HLA-DRB5, SLC39A2	0.0042	0.02	0.0089225	0.0488235
Anterior cingulate cortex BA24	ALDH5A1, HSCB, NFXL1, VEZT	0	0	0	0
Anterior cingulate cortex BA24	AIMP1, CEP135, EFTUD2, PRPF4, PTGR2	0	0.0111	0	0.0279182
Anterior cingulate cortex BA24	AIMP1, CEP135, GCSH, SFI1	0	0.0036	0	0.017928
Anterior cingulate cortex BA24	AHSA2, ARHGAP12, DDX58, SLC1A6, STOML2	0.0005	0.0042	0.00133871	0.017928
Anterior cingulate cortex BA24	AIMP1, CEP135, EFTUD2, PRPF4, PTGR2, SRGAP2	0	0.0073	0	0.0208931
Anterior cingulate cortex BA24	CUL7, FBXL18, IRGC, RCC1, TRAF1, ZNF669	0	0.0101	0	0.0357886
Anterior cingulate cortex BA24	ALDH1B1, CUL7, ECT2, MTCH2, NOP58, RCC1, SNAP47	0	0.0144	0	0.0357886
Anterior cingulate cortex BA24	MIOS, NRAS, PDE5A, SNAP47, SPG21, UNC5B	0.0002	0.025	0.000370213	0.0418269
Anterior cingulate cortex BA24	ALDH1B1, CUL7, DHX38, ECT2, NOP58, RBM8A, RCC1	0	0.0206	0	0.0373375
Anterior cingulate cortex BA24	B3GAT3, CSGALNACT2, GOSR1, GPR35, NRAS, SNAP47	0	0.0107	0	0.0357886
Anterior cingulate cortex BA24	CUL7, DDX51, MNDA, NOP58, RCC1	0	0.0126	0	0.0357886
Anterior cingulate cortex BA24	ADAM17, FBXL18, IRGC, NTAN1, RIPK1, TNFRSF1B, TRAF1	0.0061	0.0281	0.0079209	0.0435
Anterior cingulate cortex BA24	CNOT6L, LZTR1, NRAS, SNAP47	0.0002	0.026	0.000370213	0.0426792
Anterior cingulate cortex BA24	CDS1, ERMP1, PRB1, TMEM128, TMEM237	0	0.0051	0	0.0357886
Anterior cingulate cortex BA24	C1orf86, CUL7, DDX51, FANCI, GAR1, RCC1	0	0.0139	0	0.0357886
Anterior cingulate cortex BA24	ACTG1, ALDH1B1, ECT2, UCHL3, ZNF593	0.0001	0.0181	0.000212195	0.0357886
Anterior cingulate cortex BA24	CSNK1E, CUL7, DDX42, MAPK9, PICK1, RCC1, ZNF593	0	0.0102	0	0.0357886
Anterior cingulate cortex BA24	ARL5A, CUL7, KPNA2, RCC1	0	0.0135	0	0.0357886
Anterior cingulate cortex BA24	NRAS, SLC4A7, SNAP47, UNC5B	0.0004	0.0193	0.000682353	0.0366913
Anterior cingulate cortex BA24	FANCI, FLVCR1, NRAS, SNAP47, TMEM41B, UNC5B	0.0002	0.0154	0.000370213	0.0357886
Anterior cingulate cortex BA24	ASS1, CA10, DLD, PSMG4, SIRT6, THBS3, TUBB8	0	0.016	0	0.0357886
Anterior cingulate cortex BA24	CCDC154, EAF1, FGGY, GRHL3, GTF2H1, PRMT2	0.0018	0.0203	0.00274737	0.0373375
Anterior cingulate cortex BA24	HLA-B, HLA-H, PSMA4, WDR11	0.0003	0.0336	0.000522	0.0495458
Anterior cingulate cortex BA24	CUL7, DNAJB11, IQCB1, PSMA4, RCC1, THBS3, TUBB8, WDR11	0	0.0176	0	0.0357886
Anterior cingulate cortex BA24	CSNK1E, CUL7, DDX42, MAPK9, RCC1	0	0.0077	0	0.0357886
Anterior cingulate cortex BA24	COG4, COG6, SYCP2L	0.0018	0.0002	0.00274737	0.0174
Anterior cingulate cortex BA24	CUL7, DNAJB11, PSMG4, RCC1, SIRT6, THBS3, TUBB8	0	0.0111	0	0.0357886
Anterior cingulate cortex BA24	ALDH1B1, CUL7, ECT2, NOP58, RCC1	0	0.0132	0	0.0357886
Anterior cingulate cortex BA24	NRAS, RIN1, SEC23B, SNAP47	0.0014	0.0279	0.00229811	0.0435
Anterior cingulate cortex BA24	ARL6IP5, NRAS, SNAP47, TMEM128, UNC5B	0.0015	0.0194	0.00241667	0.0366913
Anterior cingulate cortex BA24	CUL7, DNAJB11, RCC1	0	0.0097	0	0.0357886
Anterior cingulate cortex BA24	CUL7, DNAJB11, RCC1, THBS3, TUBB8	0	0.0092	0	0.0357886
Anterior cingulate cortex BA24	CUL7, GNA13, RCC1	0	0.0101	0	0.0357886
Anterior cingulate cortex BA24	CD97, NRAS, SNAP47, TMEM223, UNC5B	0	0.0165	0	0.0357886
Anterior cingulate cortex BA24	CUL7, DNAJB11, GRAMD1A, RCC1, RMDN3, SNAP47	0	0.0167	0	0.0357886
Anterior cingulate cortex BA24	BARD1, CUL7, POLR2E, RCC1, UBE2E1	0	0.0118	0	0.0357886
Anterior cingulate cortex BA24	CUL7, ECT2, LRPPRC, MRPL48, RCC1	0	0.0118	0	0.0357886
Anterior cingulate cortex BA24	CUL7, DDX51, GTPBP4, MNDA, RCC1	0	0.0131	0	0.0357886
Anterior cingulate cortex BA24	CD97, NRAS, SLC4A7, SNAP47, UNC5B	0	0.0181	0	0.0357886
Anterior cingulate cortex BA24	CDC42, CUL7, ECT2, MAPK9, NOP58, RCC1	0	0.0109	0	0.0357886
Anterior cingulate cortex BA24	DLD, FBXW11, PSMA4, WDR11, ZKSCAN1	0	0.0091	0	0.0357886
Anterior cingulate cortex BA24	CDS1, ERMP1, TMEM128, TMEM237	0.0001	0.0044	0.000212195	0.0357886
Anterior cingulate cortex BA24	CUL7, DDX51, MNDA, MRPL38, MRPL48, MTRF1L, RCC1, XRN2	0	0.0151	0	0.0357886
Anterior cingulate cortex BA24	FLVCR1, NRAS, SNAP47, UNC5B	0.0002	0.0153	0.000370213	0.0357886
Anterior cingulate cortex BA24	ACTG1, CHD1L, CUL7, GNA13, LRRK2, RCC1	0	0.0108	0	0.0357886
Anterior cingulate cortex BA24	ALDH1B1, CUL7, ECT2, ERMP1, HIBADH, NOP58, RCC1	0	0.006	0	0.0357886
Anterior cingulate cortex BA24	CUL7, ECT2, LRPPRC, RCC1	0.0001	0.0119	0.000212195	0.0357886
Anterior cingulate cortex BA24	ARNT, CUL7, DNAJB11, MAP2K3, RCC1	0.0002	0.0214	0.000370213	0.0378706
Anterior cingulate cortex BA24	B3GAT3, CSGALNACT2, GOSR1, NRAS, SNAP47, UNC5B	0	0.0129	0	0.0357886
Anterior cingulate cortex BA24	CUL7, GMEB1, RCC1, USP40	0	0.0094	0	0.0357886
Anterior cingulate cortex BA24	CUL7, HIP1R, RCC1, TUFM	0.0002	0.0124	0.000370213	0.0357886
Anterior cingulate cortex BA24	ALDH1B1, CUL7, ECT2, EVI5, NOP58, RCC1, TJP2, VRK1	0	0.0117	0	0.0357886
Anterior cingulate cortex BA24	CUL7, ECT2, ENDOG, IMMT, PLGRKT, RCC1	0	0.0137	0	0.0357886
Anterior cingulate cortex BA24	ASPDH, FSD2, SPATC1L	0.0201	0.0221	0.0239548	0.0378706
Anterior cingulate cortex BA24	CUL7, DNAJB11, GRAMD1A, RCC1	0	0.0153	0	0.0357886
Anterior cingulate cortex BA24	FYCO1, GIGYF1, SEC23B, TNRC6C	0.0001	0.0071	0.000212195	0.0357886
Anterior cingulate cortex BA24	NRAS, SNAP47, SPG21, UNC5B, VMAC	0.0003	0.0222	0.000522	0.0378706
Anterior cingulate cortex BA24	CUL7, ECT2, LRPPRC, PTPRN2, RCC1	0	0.0113	0	0.0357886
Anterior cingulate cortex BA24	FRAT2, NRAS, SNAP47, UNC5B	0.0018	0.0285	0.00274737	0.0435
Anterior cingulate cortex BA24	CUL7, HADHB, NARS2, RCC1, YBEY	0.0003	0.0163	0.000522	0.0357886
Anterior cingulate cortex BA24	CUL7, IWS1, MAB21L2, RCC1, XRN2	0	0.0098	0	0.0357886
Anterior cingulate cortex BA24	ALDH1B1, ARHGAP27, CDC42, ECT2, MAPK9	0.0001	0.0281	0.000212195	0.0435
Anterior cingulate cortex BA24	AK8, GSTO2, INCA1, SEC14L4, UBE2Z	0.0028	0.0308	0.00399344	0.0462
Anterior cingulate cortex BA24	ALDH1B1, CUL7, ECT2, FANCI, NOP58, RCC1, RPS24	0	0.0173	0	0.0357886
Anterior cingulate cortex BA24	DCDC2, FBXO25, NSRP1, TUBA4A, XRCC3	0.0005	0.0077	0.0019697	0.0471852
Anterior cingulate cortex BA24	AGPS, MCUR1, NDUFAF4, NIPSNAP1	0	0.0063	0	0.0471852
Anterior cingulate cortex BA24	COMMD4, KIF14, NSRP1, WDR75, XRCC3	0.0008	0.0062	0.0026	0.0471852
Anterior cingulate cortex BA24	COMMD4, KIF14, NSRP1, PARVA, XRCC3	0.0006	0.0068	0.00216667	0.0471852
Anterior cingulate cortex BA24	GPC1, ITGA3, RABIF, RPS25, ZDHHC18	0.0001	0.0121	0.000866667	0.0481765
Anterior cingulate cortex BA24	COMMD4, EXOSC8, KIF14, LSM7, NSRP1, XRCC3	0.0003	0.007	0.00169565	0.0471852
Anterior cingulate cortex BA24	AGPS, MCUR1, MUT, NIPSNAP1, OXLD1	0	0.0115	0	0.0481765
Anterior cingulate cortex BA24	CEP63, COMMD4, KIF14, NME7, NSRP1, XRCC3	0.0005	0.008	0.0019697	0.0471852
Anterior cingulate cortex BA24	COMMD4, KIF14, METAP1, NSRP1, XRCC3	0.0005	0.0073	0.0019697	0.0471852
Anterior cingulate cortex BA24	CDK14, COMMD4, KIF14, NSRP1, XRCC3	0	0.0073	0	0.0471852
Anterior cingulate cortex BA24	AGPS, MCUR1, NIPSNAP1	0	0.0053	0	0.0471852
Anterior cingulate cortex BA24	COMMD4, HLA-C, KIF14, NSRP1, OPRL1, XRCC3	0.0003	0.0069	0.00169565	0.0471852
Anterior cingulate cortex BA24	COMMD2, COMMD4, TP53RK	0.0044	0.0071	0.00595833	0.0471852
Anterior cingulate cortex BA24	ABCA3, ATP1B3, GPC1, RPS25, UPK1A, ZDHHC18	0.0001	0.0082	0.000866667	0.0471852
Anterior cingulate cortex BA24	LGR4, PFKL, POLR1A, POLR2C	0.0033	0.009	0.00502273	0.0471852
Anterior cingulate cortex BA24	AGPS, CBS, NIPSNAP1, TRAP1	0.0001	0.0056	0.000866667	0.0471852
Anterior cingulate cortex BA24	AGPS, CDK5RAP2, NIPSNAP1, NME7	0.0001	0.0091	0.000866667	0.0471852
Anterior cingulate cortex BA24	CTNNAL1, EXOSC8, LSM7, MPHOSPH6, SNTG2, ZGPAT	0.0033	0.0126	0.00502273	0.0481765
Anterior cingulate cortex BA24	ACOT2, AGPS, COX6B1, MCUR1, NIPSNAP1, SLC25A12	0.0004	0.013	0.00192593	0.0482857
Anterior cingulate cortex BA24	COMMD4, KIF14, NSRP1, SPTBN4, XRCC3	0.001	0.0068	0.00270833	0.0471852
Anterior cingulate cortex BA24	AGPS, HMOX2, KCNJ6, NIPSNAP1, PANX1, THEM6, TMEM218	0	0.0092	0	0.0471852
Anterior cingulate cortex BA24	COMMD4, KIF14, NSRP1, PSMC3, TSEN15, XRCC3	0.0034	0.0108	0.00502273	0.0476667
Anterior cingulate cortex BA24	COMMD4, GKAP1, IBTK, KIF14, NSRP1, XRCC3	0.002	0.0098	0.004	0.0471852
Anterior cingulate cortex BA24	DUSP3, MCC, PFKL, PSMD2	0.0017	0.0053	0.00374576	0.0471852
Anterior cingulate cortex BA24	AGPS, AKIP1, CEP192, MCUR1, NIPSNAP1, POC5	0.0006	0.0096	0.00216667	0.0471852
Anterior cingulate cortex BA24	COMMD4, GKAP1, KIF14, NME7, NSRP1, RPGRIP1L, XRCC3	0.0013	0.0092	0.00325	0.0471852
Anterior cingulate cortex BA24	COMMD4, KIF14, NSRP1, SEC23B, XRCC3	0.001	0.0073	0.00270833	0.0471852
Anterior cingulate cortex BA24	C4orf27, KCNJ6, TMEM218	0.0004	0.0123	0.00192593	0.0481765
Anterior cingulate cortex BA24	COMMD2, COMMD4, MAP3K3, TOM1L1, TP53RK	0.0034	0.011	0.00502273	0.0476667
Anterior cingulate cortex BA24	COMMD4, KIF14, NSRP1, RPL36AL, SUV420H2, XRCC3	0.0011	0.0089	0.00291837	0.0471852
Anterior cingulate cortex BA24	COMMD4, HNRNPUL1, KIF14, NSRP1, RAB11B, XRCC3	0.0004	0.0069	0.00192593	0.0471852
Anterior cingulate cortex BA24	AGPS, MCUR1, MUT, NARS2, NIPSNAP1, OXLD1	0	0.0138	0	0.0498333
Anterior cingulate cortex BA24	COMMD4, KIF14, NSRP1, PPHLN1, XRCC3	0.0002	0.0064	0.00136842	0.0471852
Anterior cingulate cortex BA24	COMMD4, KIF14, NSRP1, PPIL1, PRR22, XRCC3	0.0003	0.0088	0.00169565	0.0471852
Anterior cingulate cortex BA24	LTBR, MAP3K3, RIPK1, RNF166, TAF4, TNKS2, TRAF1, ZNF564	0.0004	0.0104	0.00192593	0.0476667
Anterior cingulate cortex BA24	COMMD4, KIF14, NCOA6, NSRP1, PPIE, PTBP3, XRCC3	0.0002	0.009	0.00136842	0.0471852
Anterior cingulate cortex BA24	CAPZA2, HIP1R, KRI1, MYO6, NICN1, RIN3, TPGS1	0.0001	0.0131	0.000357778	0.0343309
Anterior cingulate cortex BA24	COQ9, EPB41L3, PCDHB5, RDH13, TSPAN33, YWHAE	0	0.0133	0	0.0343309
Anterior cingulate cortex BA24	EPB41L3, HIP1R, MTA2, PCNT, YWHAE	0.0003	0.0215	0.000743077	0.0403425
Anterior cingulate cortex BA24	CS, MRPL35, MRPL55, MUT, RIPK1, TAB2	0	0.0023	0	0.0343309
Anterior cingulate cortex BA24	COQ9, EPB41L3, GXYLT2, KCNC4, PDZD8, TEX264, TSPAN33, YWHAE	0	0.0143	0	0.0343309
Anterior cingulate cortex BA24	BDKRB2, CARS, CD81, CNN2, NAGK, PIH1D1, YWHAE	0	0.0104	0	0.0343309
Anterior cingulate cortex BA24	CARS, EIF2A, EPB41L3, PIH1D1, YWHAE	0	0.0113	0	0.0343309
Anterior cingulate cortex BA24	COQ9, EPB41L3, ERGIC3, GJB2, TSPAN33, YWHAE	0.0002	0.0144	0.000564912	0.0343309
Anterior cingulate cortex BA24	ALDH1L2, BRCA1, FKBP15, GRWD1, NACA, RBM8A, SP1	0	0.019	0	0.0372434
Anterior cingulate cortex BA24	CPE, EIF4B, EPB41L3, IRGQ, NAGK, PRNP, YWHAE	0	0.0245	0	0.0438278
Anterior cingulate cortex BA24	RIPK1, TAB2, TICAM1	0	0.0004	0	0.0343309
Anterior cingulate cortex BA24	CARS, EPB41L3, PIH1D1, POLR1A, YWHAE	0.0006	0.0142	0.00130541	0.0343309
Anterior cingulate cortex BA24	CBL, RIPK1, TAB2, YWHAE	0	0.0015	0	0.0343309
Anterior cingulate cortex BA24	EPB41L3, MTA2, PSMG4, SIRT6, YWHAE	0.0004	0.008	0.000907042	0.0343309
Anterior cingulate cortex BA24	ARL6IP1, HMOX2, MGST3, POR, TSPAN33, VIPR2	0.0003	0.0218	0.000743077	0.0403425
Anterior cingulate cortex BA24	CARS, EPB41L3, LYPLA2, OAZ3, PHYHIP, PIH1D1, PRKD2, YWHAE	0.0002	0.0131	0.000564912	0.0343309
Anterior cingulate cortex BA24	EPB41L3, LYN, RNF180, ROBO1, YWHAE	0	0.0085	0	0.0343309
Anterior cingulate cortex BA24	CERS1, EDEM1, SSR1, TMCO1	0.0015	0.0283	0.002625	0.0473041
Anterior cingulate cortex BA24	FGFR1, HSP90AB3P, MAP2K2, MRPS7	0.0026	0.0187	0.00360862	0.0372434
Anterior cingulate cortex BA24	AKT1, EPB41L3, RNF8, SIRT6, USP16, YWHAE	0.0001	0.0043	0.000357778	0.0343309
Anterior cingulate cortex BA24	CD68, KLHL3, MAL2, SGK1, WNK2	0.0049	0.0262	0.00580074	0.045357
Anterior cingulate cortex BA24	LIME1, ROBO1, SLC39A10, STX6	0.0003	0.0085	0.000743077	0.0343309
Anterior cingulate cortex BA24	AKT1, EPB41L3, KLHL3, SIRT6, YWHAE	0.0004	0.0052	0.000907042	0.0343309
Anterior cingulate cortex BA24	COG1, COG3, COQ9, OPRM1, TEX264, TSPAN33, YWHAE	0	0.0103	0	0.0343309
Anterior cingulate cortex BA24	BSND, CLSTN1, CSGALNACT2, DEFA5, GXYLT2, MGAT4C, P2RX5	0.008	0.028	0.00858667	0.0473041
Anterior cingulate cortex BA24	ATP6V0A1, CEACAM21, CYTH2, FGFR1, MRPS7, SMPD3	0.0001	0.0113	0.000357778	0.0343309
Anterior cingulate cortex BA24	APPBP2, EIF4B, EPB41L3, IKBKE, YWHAE	0	0.0251	0	0.043925
Anterior cingulate cortex BA24	EVI5L, HMOX2, MGST3, POR, TSPAN33, VIPR2	0.0001	0.0192	0.000357778	0.0372434
Anterior cingulate cortex BA24	GJB2, MARCH1, MGST3, POR, TFRC, TSPAN33	0.0006	0.0222	0.00130541	0.0406159
Anterior cingulate cortex BA24	COQ9, EPB41L3, TSPAN33, YWHAE	0	0.01	0	0.0343309
Anterior cingulate cortex BA24	EPB41L3, KCNN4, SCNN1A, USP8, YWHAE	0	0.0129	0	0.0343309
Anterior cingulate cortex BA24	COQ9, EPB41L3, TEX264, TSPAN33, YWHAE	0	0.0094	0	0.0343309
Anterior cingulate cortex BA24	EPB41L3, MTA2, SIRT6, YWHAE	0.0003	0.0067	0.000743077	0.0343309
Anterior cingulate cortex BA24	ACP6, CARS, DHX36, DPF2, SUCLG2	0.0003	0.0034	0.000743077	0.0343309
Anterior cingulate cortex BA24	ALDH1L2, DDB1, GRWD1, NACA, NUP43, SPAST	0	0.0105	0	0.0343309
Anterior cingulate cortex BA24	EPB41L3, TLK1, YWHAE, ZSCAN1, ZSCAN22	0.0001	0.0188	0.000357778	0.0372434
Anterior cingulate cortex BA24	COQ9, EPB41L3, HERC6, KCTD15, TSPAN33, YWHAE	0	0.0134	0	0.0343309
Anterior cingulate cortex BA24	CARS, EPB41L3, MCCC2, PIH1D1, YWHAE	0.0002	0.0145	0.000564912	0.0343309
Anterior cingulate cortex BA24	CEP164, DBT, GPX1, RNF8, USP16	0.0033	0.0136	0.00428468	0.0343309
Anterior cingulate cortex BA24	CARS, CNN2, ENDOG, NAGK, PIH1D1, TPM1, YWHAE	0	0.0106	0	0.0343309
Anterior cingulate cortex BA24	CARS, EPB41L3, PALLD, PIH1D1, SIRT6, YWHAE	0.0001	0.0076	0.000357778	0.0343309
Anterior cingulate cortex BA24	CA9, COQ9, EPB41L3, POR, TEX264, TSPAN33, YWHAE	0	0.0082	0	0.0343309
Anterior cingulate cortex BA24	ERAP1, HLA-DQB2, LIME1, ROBO1, STX6, TMEM87A	0.0004	0.0121	0.000907042	0.0343309
Anterior cingulate cortex BA24	ALDH1L2, GRWD1, NACA, RPN1, TMCO1	0	0.011	0	0.0343309
Anterior cingulate cortex BA24	AIDA, DDIT4L, FAM118A, MYLIP, RPIA, VLDLR	0.0027	0.0249	0.0036839	0.043925
Anterior cingulate cortex BA24	CARS, EPB41L3, PIH1D1, RNF8, SEC23B, SUMO3, USP16, YWHAE	0.0002	0.0069	0.000564912	0.0343309
Anterior cingulate cortex BA24	CSGALNACT1, LIME1, ROBO1, STX6	0.0008	0.0085	0.00159012	0.0343309
Anterior cingulate cortex BA24	DENND4B, NFXL1, ST7, TMCO1	0.0002	0.0065	0.000564912	0.0343309
Anterior cingulate cortex BA24	KLHL3, MAL2, SGK1, WNK2	0.0056	0.0188	0.00653333	0.0372434
Anterior cingulate cortex BA24	CARS, CNN2, EPB41L3, NAGK, PIH1D1, YWHAE	0.0001	0.0122	0.000357778	0.0343309
Anterior cingulate cortex BA24	CAPZA2, HIP1R, KRI1, MYO6, RIN3	0.0004	0.0109	0.000907042	0.0343309
Anterior cingulate cortex BA24	BSND, CSGALNACT1, CSGALNACT2, GXYLT2, MGAT4C	0.0048	0.0159	0.00576716	0.0355542
Anterior cingulate cortex BA24	FGFR1, MARCH1, MRPS7, PPP2R1B	0.0022	0.0171	0.00334151	0.036708
Anterior cingulate cortex BA24	CCDC101, CCDC146, KRT19, PDE4DIP, RIN3, TGM1	0.0022	0.018	0.00334151	0.0371538
Anterior cingulate cortex BA24	APPBP2, C1QTNF2, C1orf109, GIGYF1, ZNF17	0	0.0159	0	0.0355542
Anterior cingulate cortex BA24	COQ9, EPB41L3, RIN3, RPS3, TSPAN33, YWHAE	0	0.0108	0	0.0343309
Anterior cingulate cortex BA24	CS, MUT, RIPK1, SUCLG2, TAB2	0	0.0028	0	0.0343309
Anterior cingulate cortex BA24	CARS, EIF2A, EPB41L3, PIH1D1, POLR1A, YWHAE	0	0.0165	0	0.0363904
Anterior cingulate cortex BA24	ASCC2, CPE, MED31, PAPD5, ZSCAN1, ZSCAN22	0.0002	0.0094	0.000564912	0.0343309
Anterior cingulate cortex BA24	HBM, KLHL3, LTF, MAL2, SGK1, WNK2	0.0078	0.0214	0.00842819	0.0403425
Anterior cingulate cortex BA24	CARS, FGFR1, MCCC2, MRPS7, NDUFB10, PIH1D1, YWHAE	0	0.0075	0	0.0343309
Anterior cingulate cortex BA24	ACP6, DHX36, SUCLG2	0.0004	0.0026	0.000907042	0.0343309
Anterior cingulate cortex BA24	ATP6V0A1, CYTH2, SMPD3, SNTG1, STXBP3, VAMP2	0.0023	0.0266	0.00339725	0.0455596
Anterior cingulate cortex BA24	CNOT6L, SIRT6, TUBB8, VASN, ZSCAN1, ZSCAN22	0.0006	0.0112	0.00130541	0.0343309
Anterior cingulate cortex BA24	ASCC2, CEP164, GPX1, PAPD5, RPP38	0.0009	0.0084	0.001725	0.0343309
Anterior cingulate cortex BA24	COQ9, EPB41L3, PAFAH1B2, TSPAN33, YWHAE	0	0.0098	0	0.0343309
Anterior cingulate cortex BA24	ABCA7, CARS, LLGL2, PALLD, PIH1D1, SIRT6, YWHAE	0.0002	0.0099	0.000564912	0.0343309
Anterior cingulate cortex BA24	RIPK1, SLC19A3, TAB2, TMEM242	0.0004	0.0024	0.000907042	0.0343309
Anterior cingulate cortex BA24	ANAPC4, EPB41L3, GPHN, MTA2, SIRT6, YWHAE	0.0002	0.0086	0.000564912	0.0343309
Anterior cingulate cortex BA24	ATP6V0A1, CYTH2, SMPD3	0.0025	0.0178	0.0035	0.0371538
Anterior cingulate cortex BA24	CTU1, FGFR1, LTBR, MRPS7, UROS	0.0023	0.01	0.00339725	0.0343309
Anterior cingulate cortex BA24	CARS, KMT2A, PIH1D1, TMCO1, YWHAE	0	0.0111	0	0.0343309
Anterior cingulate cortex BA24	CARS, PIH1D1, POLR1A, POLR3K, RIN3, YWHAE	0.0001	0.0176	0.000357778	0.0371538
Anterior cingulate cortex BA24	BSND, CSGALNACT1, CSGALNACT2, LIME1, ROBO1, STX6	0.0003	0.0111	0.000743077	0.0343309
Anterior cingulate cortex BA24	ACP6, DHX36, SUCLG1, SUCLG2	0.0007	0.004	0.00148289	0.0343309
Anterior cingulate cortex BA24	CDK6, GIGYF1, LATS2, MOB3B, ZSCAN1, ZSCAN22	0.0002	0.0149	0.000564912	0.0347667
Anterior cingulate cortex BA24	CD2AP, EPB41L3, MTA2, RIN3, YWHAE	0.0002	0.0234	0.000564912	0.0423303
Anterior cingulate cortex BA24	CERS1, EDEM1, POM121C, SSR1, TMCO1	0.0001	0.0216	0.000357778	0.0403425
Anterior cingulate cortex BA24	CAPZA2, CCDC101, CNOT7, HIP1R, MPRIP, RIN3	0.0008	0.0156	0.00159012	0.0355542
Anterior cingulate cortex BA24	CPSF3L, GIGYF1, HSD17B14, SNRPC	0.0017	0.0138	0.00294301	0.0343309
Anterior cingulate cortex BA24	DOK4, EPB41L3, FBXO45, NOS2, OPRK1, STAT2, YWHAE	0.0003	0.0116	0.000743077	0.0343309
Anterior cingulate cortex BA24	CPSF3L, GIGYF1, SF3A2, SNRPC	0.0025	0.0285	0.0035	0.0473041
Anterior cingulate cortex BA24	CHMP3, DCUN1D4, SIX2, VAV2	0.0027	0.0071	0.0036839	0.0343309
Anterior cingulate cortex BA24	CARS, EPB41L3, PIH1D1, YWHAE	0.0008	0.0116	0.00159012	0.0343309
Anterior cingulate cortex BA24	EDEM1, EPB41L3, FBXO6, TMCO1, YWHAE	0	0.0099	0	0.0343309
Anterior cingulate cortex BA24	EPB41L3, LIN37, MTA2, PDE4DIP, SIRT6, YWHAE	0.0009	0.0104	0.001725	0.0343309
Anterior cingulate cortex BA24	COQ9, EPB41L3, SDR39U1, TSPAN33, YWHAE	0	0.0131	0	0.0343309
Anterior cingulate cortex BA24	ACP6, DHX36, PARVA, SUCLG2	0.0009	0.0041	0.001725	0.0343309
Anterior cingulate cortex BA24	CS, FGFR1, MRPS7, MUT, RIPK1, TAB2	0	0.0024	0	0.0343309
Anterior cingulate cortex BA24	ACP6, EPB41L3, GRPEL1, SUCLG2, YWHAE	0.0002	0.0168	0.000564912	0.0365514
Anterior cingulate cortex BA24	ALDH1L2, BCAR1, FKBP15, GRWD1, NACA	0.0001	0.0134	0.000357778	0.0343309
Anterior cingulate cortex BA24	ARL6IP1, COQ9, MGST3, TSPAN33, YWHAE, ZNF391	0.0001	0.0141	0.000357778	0.0343309
Anterior cingulate cortex BA24	CARS, EIF2A, EPB41L3, PAPSS1, PIH1D1, SNRNP27, YWHAE	0.0001	0.0128	0.000357778	0.0343309
Anterior cingulate cortex BA24	ALDH1L2, GRWD1, NACA, RBM8A	0.0003	0.0125	0.000743077	0.0343309
Anterior cingulate cortex BA24	COQ9, EPB41L3, FAM163A, TSPAN33, YWHAE	0.0001	0.0102	0.000357778	0.0343309
Anterior cingulate cortex BA24	CARS, CNN2, CPSF7, NAGK, PIH1D1, PPIL4, YWHAE	0.0001	0.0127	0.000357778	0.0343309
Anterior cingulate cortex BA24	EPB41L3, MAP2K2, NEK1, RIN3, YWHAE, YWHAH	0	0.0122	0	0.0343309
Anterior cingulate cortex BA24	DERL1, RMDN3, SLC13A3, SRPR, TCTN2, TECR	0.0005	0.004	0.00286667	0.0324154
Anterior cingulate cortex BA24	BDKRB2, CNNM3, MPI, TGM1	0.0002	0.002	0.00156364	0.0324154
Anterior cingulate cortex BA24	COG4, DERL1, GGT7, HSD3B7, SRPR	0	0.0007	0	0.0315333
Anterior cingulate cortex BA24	ARMC10, DERL1, PXMP2, RMDN3, SLC13A3, SRPR	0.0004	0.0024	0.00264615	0.0324154
Anterior cingulate cortex BA24	ATXN2, DHX36, DRG2, EIF4A3, LARP4B, WWP2	0	0.0049	0	0.0324154
Anterior cingulate cortex BA24	DERL1, RMDN3, SLC13A3, SRPR	0.0003	0.001	0.00215	0.0315333
Anterior cingulate cortex BA24	FAM101B, MYADML2, NSG1, PDZK1IP1, TNFRSF10C	0.0276	0.0081	0.0409241	0.0435375
Anterior cingulate cortex BA24	ATXN2, DHX36, LARP4B, WWP2	0	0.0042	0	0.0324154
Anterior cingulate cortex BA24	ARMC10, CD27, DERL1, PXMP2, SIVA1, SRPR	0.0039	0.004	0.0104242	0.0324154
Anterior cingulate cortex BA24	ARRB1, ATXN2, DHX36, LARP4B, POLR1A, WWP2, YWHAE	0	0.0049	0	0.0324154
Anterior cingulate cortex BA24	CNNM3, DCAF11, RFWD2, TENC1	0	0.0019	0	0.0324154
Anterior cingulate cortex BA24	ARRB1, ATXN2, DHX36, LARP4B, WWP2, YWHAE	0	0.0045	0	0.0324154
Anterior cingulate cortex BA24	ARF6, CNNM3, SFXN1	0	0.0011	0	0.0315333
Anterior cingulate cortex BA24	ATXN2, BOLA2, DHX36, LARP4B, WWP2	0	0.0028	0	0.0324154
Anterior cingulate cortex BA24	ATXN2, CCDC151, CCDC93, COMMD2, DHX36, LARP4B, WWP2	0	0.0066	0	0.03784
Anterior cingulate cortex BA24	MYADML2, NSG1, PDZK1IP1	0.0348	0.0064	0.04988	0.03784
Anterior cingulate cortex BA24	HLA-B, NAT10, NF2, RPL18A, SGSM3	0.0006	0.0127	0.00144615	0.0373062
Anterior cingulate cortex BA24	AHNAK2, DOCK7, DYRK1A, S100A10, TTLL13	0.0001	0.0111	0.000376	0.0373062
Anterior cingulate cortex BA24	CLPB, COQ9, GLRX5, SDR39U1	0.0037	0.0118	0.00644074	0.0373062
Anterior cingulate cortex BA24	CSNK1E, FUBP3, PCM1, SAV1, TTLL5, ZNF133	0	0.0079	0	0.0373062
Anterior cingulate cortex BA24	C19orf44, CBR1, CLPB, HMGCR, TTF2, UBC	0	0.0092	0	0.0373062
Anterior cingulate cortex BA24	EIF2A, NAT10, RPL18A, RPS5, SIRT6, UBR5	0.0003	0.0168	0.000805714	0.03948
Anterior cingulate cortex BA24	C19orf44, CBR1, HMGCR, PSMD4, TMEM223, UBC	0	0.0076	0	0.0373062
Anterior cingulate cortex BA24	ABHD14A, HDAC10, PCBP3	0.0312	0.0093	0.0353349	0.0373062
Anterior cingulate cortex BA24	C19orf44, CBR1, ESYT2, HMGCR, RHBDD1, TMEM223, UBC	0	0.0105	0	0.0373062
Anterior cingulate cortex BA24	AHNAK2, DOCK7, DYRK1A, PHF5A, S100A10, SNRPA1	0.0001	0.0131	0.000376	0.0373152
Anterior cingulate cortex BA24	ACADS, CLPB, COQ9, CSGALNACT2, FAM213A, SDR39U1, SUN2	0.0032	0.007	0.00589804	0.0373062
Anterior cingulate cortex BA24	C19orf44, CBR1, HMGCR, PLEC, QSER1, TMEM223, UBC	0.0002	0.01	0.000606452	0.0373062
Anterior cingulate cortex BA24	AHNAK2, ARPC5L, DOCK7, DYRK1A, S100A10	0	0.0083	0	0.0373062
Anterior cingulate cortex BA24	BRD3, INO80B, NAT10, RPL18A, SIRT6, UBR5	0.0002	0.0184	0.000606452	0.041181
Anterior cingulate cortex BA24	C19orf44, CBR1, HMGCR, TMEM223, UBC	0	0.0087	0	0.0373062
Anterior cingulate cortex BA24	MED28, NAT10, NF2, RPL18A, SGSM3, SUOX	0.0005	0.023	0.00127027	0.047
Anterior cingulate cortex BA24	BTN2A1, HMGCR, TYW1	0.0001	0.0058	0.000376	0.0373062
Anterior cingulate cortex BA24	CLPB, COQ9, SDR39U1, TAMM41	0.0029	0.0098	0.00556327	0.0373062
Anterior cingulate cortex BA24	HLA-B, HSPA5, LAMB1, SGSM3	0.0019	0.0203	0.00388261	0.0424044
Anterior cingulate cortex BA24	CANX, ESYT2, NAT10, RPL18A, SIRT6, UBR5	0.0008	0.0203	0.00183415	0.0424044
Anterior cingulate cortex BA24	C19orf44, CBR1, HLX, HMGCR, KBTBD7, PSMD4, UBC, ZNF24	0	0.0093	0	0.0373062
Anterior cingulate cortex BA24	BRD3, NAT10, RNPS1, RPL18A, SIRT6, UBR5	0.0001	0.0107	0.000376	0.0373062
Anterior cingulate cortex BA24	AHNAK2, DOCK7, DYRK1A, PCK2, S100A10	0	0.0147	0	0.0394278
Anterior cingulate cortex BA24	ARPC5L, DOCK7, DYRK1A, IQGAP1, PARVA, PTGR2	0	0.0088	0	0.0373062
Anterior cingulate cortex BA24	BRD3, LRRC4, NBR1, SPP1, USP8	0.0006	0.0109	0.00144615	0.0373062
Anterior cingulate cortex BA24	AHNAK2, DOCK7, DYRK1A, S100A10	0	0.0198	0	0.0424044
Anterior cingulate cortex BA24	C7orf25, NF2, RPL18A, RPL36AL, SGSM3, SUV420H2	0.0002	0.0111	0.000606452	0.0373062
Anterior cingulate cortex BA24	AHNAK2, DOCK7, DYRK1A, RPL12, RPL18A, S100A10	0	0.0122	0	0.0373062
Anterior cingulate cortex BA24	CLPB, COQ9, SDR39U1	0.0049	0.0088	0.00794138	0.0373062
Anterior cingulate cortex BA24	HLA-B, HSPA5, LAMB1, SGSM3, VSIG8	0.0013	0.016	0.00277727	0.03948
Anterior cingulate cortex BA24	AHNAK2, DOCK7, DYRK1A, KRI1, S100A10	0.0002	0.0177	0.000606452	0.0405805
Anterior cingulate cortex BA24	CSNK1E, KIAA0101, LTBR, NBR1, TMEM259, TRIM4	0.0035	0.0018	0.00620755	0.0373062
Anterior cingulate cortex BA24	C19orf44, CBR1, HMGCR, MTCH2, SNAP47, UBC	0	0.0111	0	0.0373062
Anterior cingulate cortex BA24	AHNAK2, CBR1, DOCK7, DYRK1A, SCN3B, SNAP47, STX6	0	0.0158	0	0.03948
Anterior cingulate cortex BA24	CLPB, COQ9, CSGALNACT2, FAM213A, SDR39U1	0.0007	0.0038	0.001645	0.0373062
Anterior cingulate cortex BA24	NF2, RPL18A, RPL36AL, SGSM3, SUV420H2	0.0005	0.0095	0.00127027	0.0373062
Anterior cingulate cortex BA24	CSNK1E, FUBP3, SAV1, ZNF133	0	0.0045	0	0.0373062
Anterior cingulate cortex BA24	GAR1, NAT10, RPL18A, SIRT6, TTLL5, UBR5	0.0002	0.0151	0.000606452	0.0394278
Anterior cingulate cortex BA24	ACAT1, CCDC58, DOCK7, DYRK1A, LRPPRC, MTFMT, S100A10	0.0001	0.0168	0.000376	0.03948
Anterior cingulate cortex BA24	NAT10, RPL18A, SIRT6, UBR5	0.0013	0.0118	0.00277727	0.0373062
Anterior cingulate cortex BA24	GPS2, RNF14, TRIM65, TRIM68, UBE2U	0.0419	0.0046	0.0452713	0.0373062
Anterior cingulate cortex BA24	NAT10, NF2, RPL18A, RPL36AL, SGSM3, SUV420H2	0.0003	0.0099	0.000805714	0.0373062
Anterior cingulate cortex BA24	EHD4, NAT10, RPL18A, SIRT6, UBR5	0.0009	0.0126	0.00201429	0.0373062
Anterior cingulate cortex BA24	CSNK1E, FUBP3, LTBR, NBR1, SAV1, ZNF133	0	0.0002	0	0.0188
Anterior cingulate cortex BA24	BRD3, LRRC4, SPP1	0.0024	0.0096	0.0048	0.0373062
Anterior cingulate cortex BA24	C19orf44, CBR1, CLPB, HMGCR, UBC, UCHL3	0	0.0144	0	0.0394278
Anterior cingulate cortex BA24	ETFB, MRPL20, MTRF1L, NDUFAF4, PDPR	0.0168	0.0107	0.0222097	0.0481737
Anterior cingulate cortex BA24	HIST1H3A, JMJD6, KAT7, SP110, YWHAG	0.0001	0.0081	0.0027	0.0481737
Anterior cingulate cortex BA24	ARL6IP5, FAM134B, SEC23B, TMEM216, WDR41	0.0017	0.0042	0.01215	0.04617
Anterior cingulate cortex BA24	DDX42, MTMR4, UBE3A, YWHAG	0.0023	0.0125	0.01242	0.0482143
Anterior cingulate cortex BA24	ARSJ, LTBR, TRAF1, TRIM4, ZNF23	0.0059	0.0016	0.0143486	0.04617
Anterior cingulate cortex BA24	FAM134B, SEC23B, TMEM216, WDR41	0.006	0.0039	0.0143486	0.04617
Anterior cingulate cortex BA24	BMP7, GNB2, GRB7, SERINC1, TDGF1	0.0061	0.0113	0.0143486	0.0481737
Anterior cingulate cortex BA24	CARD9, DTD1, GAS8, IQCB1, ZCCHC7	0.0018	0.0112	0.01215	0.0481737
Anterior cingulate cortex BA24	ARL6IP5, FAM134B, HSD17B11, MIA3, WDR41	0.0017	0.0041	0.01215	0.04617
Anterior cingulate cortex BA24	ACTR2, ANO7, CHCHD10, CHCHD4, CISD3, NDUFAF4, TRPM3	0.0039	0.0125	0.0143486	0.0482143
Anterior cingulate cortex BA24	MRPL20, MTRF1L, NDUFAF4, PDPR	0.0085	0.0075	0.01584	0.0481737
Anterior cingulate cortex BA24	C2CD3, CCDC85C, CNTRL, MAP4K4	0.0058	0.0046	0.0143486	0.04617
Anterior cingulate cortex BA24	CARD9, DNPEP, GRWD1, LNX1	0.0005	0.0105	0.0081	0.0481737
Anterior cingulate cortex BA24	CARD9, DDX58, DNPEP, PTPN12, SEC23B	0.0003	0.0012	0.006075	0.04617
Anterior cingulate cortex BA24	CPNE2, FAM134B, SEC23B, TMEM216, WDR41	0.0023	0.0046	0.01242	0.04617
Anterior cingulate cortex BA24	C2CD3, COMMD2, PCM1, SP110, YBEY	0.0029	0.0103	0.013365	0.0481737
Anterior cingulate cortex BA24	FAM134B, JPH1, SEC23B, TMEM216, WDR41	0.0031	0.0054	0.013365	0.04617
Anterior cingulate cortex BA24	C2CD3, COMMD2, KAT7, PCM1, SP110	0.0033	0.0092	0.013365	0.0481737
Anterior cingulate cortex BA24	ARSJ, LTBR, TRAF1, ZNF23	0.0095	0.0057	0.0163723	0.04617
Anterior cingulate cortex BA24	ARSJ, LTBR, TRAF1, ZNF23, ZNF724P	0.0157	0.0098	0.0216915	0.0481737
Anterior cingulate cortex BA24	CARD9, DNPEP, FAM118A, GRWD1, LNX1	0	0.0041	0	0.04617
Anterior cingulate cortex BA24	CD3EAP, LUC7L3, NFATC1, OBSL1, PTPLAD1	0	0	0	0
Anterior cingulate cortex BA24	EIF4H, NFATC1, SATB1, SPG21	0.0022	0.0008	0.0089375	0.00866667
Anterior cingulate cortex BA24	L3MBTL4, NFATC1, PSMC1, SATB1, SPG21, USP44	0.003	0.0007	0.0108333	0.00866667
Anterior cingulate cortex BA24	NFATC1, RPS27L, TUBA1A	0.002	0.0002	0.00866667	0.00433333
Anterior cingulate cortex BA24	CGRRF1, DPYSL2, NFATC1, RPS27L, TUBA1A	0.0001	0.0001	0.0013	0.00325
Anterior cingulate cortex BA24	CDCA5, NFATC1, SCAI, STK38	0.0017	0.0004	0.0085	0.0065
Anterior cingulate cortex BA24	CPSF3L, EXOSC3, MYC, NFXL1, SPAG8	0	0	0	0
