# Supplementary material for: A Method for Bridging Population-Specific Genotypes to Detect Gene Modules Associated with Alzheimer’s Disease
Source: Cells. 2022 Jul 16;11(14):2219. doi: 10.3390/cells11142219 (PMC9319087; doi:10.3390/cells11142219)
Supplement: Supplementary file 1 [file cells-11-02219-s001.zip › TableS3.xlsx]

## Sheet: Table S3
Table S3: Gene Set Variation Analysis result of Benjamini-Hochberg adjusted p-values for 2521 Canonical pathways and Gene Ontology terms among three populations
Type	Name	African	Hispanic	White
Canonical Pathway	BIOCARTA_ACH_PATHWAY	1	1	1
Canonical Pathway	BIOCARTA_AGR_PATHWAY	1	1	1
Canonical Pathway	BIOCARTA_AKAPCENTROSOME_PATHWAY	1	1	1
Canonical Pathway	BIOCARTA_AKT_PATHWAY	1	1	1
Canonical Pathway	BIOCARTA_ALK_PATHWAY	1	1	1
Canonical Pathway	BIOCARTA_AMAN_PATHWAY	1	1	1
Canonical Pathway	BIOCARTA_ARAP_PATHWAY	1	1	1
Canonical Pathway	BIOCARTA_ARENRF2_PATHWAY	1	1	1
Canonical Pathway	BIOCARTA_ARF_PATHWAY	1	1	1
Canonical Pathway	BIOCARTA_ASBCELL_PATHWAY	1	1	1
Canonical Pathway	BIOCARTA_AT1R_PATHWAY	1	1	1
Canonical Pathway	BIOCARTA_ATM_PATHWAY	1	1	1
Canonical Pathway	BIOCARTA_ATRBRCA_PATHWAY	1	1	1
Canonical Pathway	BIOCARTA_BAD_PATHWAY	1	1	1
Canonical Pathway	BIOCARTA_BARRESTIN_SRC_PATHWAY	1	1	1
Canonical Pathway	BIOCARTA_BBCELL_PATHWAY	1	1	1
Canonical Pathway	BIOCARTA_BCELLSURVIVAL_PATHWAY	1	1	1
Canonical Pathway	BIOCARTA_BCR_PATHWAY	1	1	1
Canonical Pathway	BIOCARTA_BIOPEPTIDES_PATHWAY	1	1	1
Canonical Pathway	BIOCARTA_CALCINEURIN_PATHWAY	1	1	1
Canonical Pathway	BIOCARTA_CASPASE_PATHWAY	1	1	1
Canonical Pathway	BIOCARTA_CCR3_PATHWAY	1	1	1
Canonical Pathway	BIOCARTA_CDC25_PATHWAY	1	1	1
Canonical Pathway	BIOCARTA_CDK5_PATHWAY	1	1	1
Canonical Pathway	BIOCARTA_CDMAC_PATHWAY	1	1	1
Canonical Pathway	BIOCARTA_CERAMIDE_PATHWAY	1	1	1
Canonical Pathway	BIOCARTA_CHEMICAL_PATHWAY	1	1	1
Canonical Pathway	BIOCARTA_CREB_PATHWAY	1	1	1
Canonical Pathway	BIOCARTA_CSK_PATHWAY	1	1	1
Canonical Pathway	BIOCARTA_CXCR4_PATHWAY	1	1	1
Canonical Pathway	BIOCARTA_DC_PATHWAY	1	1	1
Canonical Pathway	BIOCARTA_DEATH_PATHWAY	1	1	1
Canonical Pathway	BIOCARTA_EDG1_PATHWAY	1	1	1
Canonical Pathway	BIOCARTA_EGF_PATHWAY	1	1	1
Canonical Pathway	BIOCARTA_EICOSANOID_PATHWAY	1	1	1
Canonical Pathway	BIOCARTA_EPO_PATHWAY	1	1	1
Canonical Pathway	BIOCARTA_ERAD_PATHWAY	1	1	1
Canonical Pathway	BIOCARTA_ERK_PATHWAY	1	1	1
Canonical Pathway	BIOCARTA_FAS_PATHWAY	1	1	1
Canonical Pathway	BIOCARTA_FCER1_PATHWAY	1	1	1
Canonical Pathway	BIOCARTA_FMLP_PATHWAY	1	1	1
Canonical Pathway	BIOCARTA_G1_PATHWAY	1	1	1
Canonical Pathway	BIOCARTA_G2_PATHWAY	1	1	1
Canonical Pathway	BIOCARTA_GH_PATHWAY	1	1	1
Canonical Pathway	BIOCARTA_GHRELIN_PATHWAY	1	1	1
Canonical Pathway	BIOCARTA_GLEEVEC_PATHWAY	1	1	1
Canonical Pathway	BIOCARTA_GPCR_PATHWAY	1	1	1
Canonical Pathway	BIOCARTA_HCMV_PATHWAY	1	1	1
Canonical Pathway	BIOCARTA_HDAC_PATHWAY	1	1	1
Canonical Pathway	BIOCARTA_HER2_PATHWAY	1	1	1
Canonical Pathway	BIOCARTA_HIF_PATHWAY	1	1	1
Canonical Pathway	BIOCARTA_HIVNEF_PATHWAY	1	1	1
Canonical Pathway	BIOCARTA_HSP27_PATHWAY	1	1	1
Canonical Pathway	BIOCARTA_IGF1_PATHWAY	1	1	1
Canonical Pathway	BIOCARTA_IGF1MTOR_PATHWAY	1	1	1
Canonical Pathway	BIOCARTA_IGF1R_PATHWAY	1	1	1
Canonical Pathway	BIOCARTA_IL10_PATHWAY	1	1	1
Canonical Pathway	BIOCARTA_IL1R_PATHWAY	1	1	1
Canonical Pathway	BIOCARTA_IL2_PATHWAY	1	1	1
Canonical Pathway	BIOCARTA_IL2RB_PATHWAY	1	1	1
Canonical Pathway	BIOCARTA_IL4_PATHWAY	1	1	1
Canonical Pathway	BIOCARTA_IL6_PATHWAY	1	1	1
Canonical Pathway	BIOCARTA_IL7_PATHWAY	1	1	1
Canonical Pathway	BIOCARTA_INFLAM_PATHWAY	1	1	1
Canonical Pathway	BIOCARTA_INSULIN_PATHWAY	1	1	1
Canonical Pathway	BIOCARTA_INTEGRIN_PATHWAY	1	1	1
Canonical Pathway	BIOCARTA_INTRINSIC_PATHWAY	1	1	1
Canonical Pathway	BIOCARTA_KERATINOCYTE_PATHWAY	1	1	1
Canonical Pathway	BIOCARTA_LIS1_PATHWAY	1	1	1
Canonical Pathway	BIOCARTA_LONGEVITY_PATHWAY	1	1	1
Canonical Pathway	BIOCARTA_LYM_PATHWAY	1	1	1
Canonical Pathway	BIOCARTA_MAL_PATHWAY	1	1	1
Canonical Pathway	BIOCARTA_MAPK_PATHWAY	1	1	1
Canonical Pathway	BIOCARTA_MCM_PATHWAY	1	1	1
Canonical Pathway	BIOCARTA_MET_PATHWAY	1	1	1
Canonical Pathway	BIOCARTA_MHC_PATHWAY	1	1	1
Canonical Pathway	BIOCARTA_MITOCHONDRIA_PATHWAY	1	1	1
Canonical Pathway	BIOCARTA_NDKDYNAMIN_PATHWAY	1	1	1
Canonical Pathway	BIOCARTA_NFAT_PATHWAY	1	1	1
Canonical Pathway	BIOCARTA_NFKB_PATHWAY	1	1	1
Canonical Pathway	BIOCARTA_NGF_PATHWAY	1	1	1
Canonical Pathway	BIOCARTA_NKCELLS_PATHWAY	1	1	1
Canonical Pathway	BIOCARTA_NOS1_PATHWAY	1	1	1
Canonical Pathway	BIOCARTA_NPP1_PATHWAY	1	1	1
Canonical Pathway	BIOCARTA_NUCLEARRS_PATHWAY	1	1	1
Canonical Pathway	BIOCARTA_P38MAPK_PATHWAY	1	1	1
Canonical Pathway	BIOCARTA_PDGF_PATHWAY	1	1	1
Canonical Pathway	BIOCARTA_PPARA_PATHWAY	1	1	1
Canonical Pathway	BIOCARTA_PTDINS_PATHWAY	1	1	1
Canonical Pathway	BIOCARTA_PTEN_PATHWAY	1	1	1
Canonical Pathway	BIOCARTA_PYK2_PATHWAY	1	1	1
Canonical Pathway	BIOCARTA_RACC_PATHWAY	1	1	1
Canonical Pathway	BIOCARTA_RACCYCD_PATHWAY	1	1	1
Canonical Pathway	BIOCARTA_RAS_PATHWAY	1	1	1
Canonical Pathway	BIOCARTA_RB_PATHWAY	1	1	1
Canonical Pathway	BIOCARTA_SM_PATHWAY	1	1	1
Canonical Pathway	BIOCARTA_SODD_PATHWAY	1	1	1
Canonical Pathway	BIOCARTA_SPPA_PATHWAY	1	1	1
Canonical Pathway	BIOCARTA_SPRY_PATHWAY	1	1	1
Canonical Pathway	BIOCARTA_TCR_PATHWAY	1	1	1
Canonical Pathway	BIOCARTA_TCRA_PATHWAY	1	1	1
Canonical Pathway	BIOCARTA_TEL_PATHWAY	1	1	1
Canonical Pathway	BIOCARTA_TFF_PATHWAY	1	1	1
Canonical Pathway	BIOCARTA_TH1TH2_PATHWAY	1	1	1
Canonical Pathway	BIOCARTA_TID_PATHWAY	1	1	1
Canonical Pathway	BIOCARTA_TNFR1_PATHWAY	1	1	1
Canonical Pathway	BIOCARTA_TNFR2_PATHWAY	1	1	1
Canonical Pathway	BIOCARTA_TOLL_PATHWAY	1	1	1
Canonical Pathway	BIOCARTA_TPO_PATHWAY	1	1	1
Canonical Pathway	BIOCARTA_VEGF_PATHWAY	1	1	1
Canonical Pathway	KEGG_ABC_TRANSPORTERS	1	1	1
Canonical Pathway	KEGG_ACUTE_MYELOID_LEUKEMIA	1	1	1
Canonical Pathway	KEGG_ADHERENS_JUNCTION	1	1	1
Canonical Pathway	KEGG_ADIPOCYTOKINE_SIGNALING_PATHWAY	1	1	1
Canonical Pathway	KEGG_ALANINE_ASPARTATE_AND_GLUTAMATE_METABOLISM	1	1	1
Canonical Pathway	KEGG_ALDOSTERONE_REGULATED_SODIUM_REABSORPTION	1	1	1
Canonical Pathway	KEGG_ALLOGRAFT_REJECTION	1	1	1
Canonical Pathway	KEGG_ALPHA_LINOLENIC_ACID_METABOLISM	1	1	1
Canonical Pathway	KEGG_ALZHEIMERS_DISEASE	1	1	1
Canonical Pathway	KEGG_AMINO_SUGAR_AND_NUCLEOTIDE_SUGAR_METABOLISM	1	1	1
Canonical Pathway	KEGG_AMINOACYL_TRNA_BIOSYNTHESIS	1	1	1
Canonical Pathway	KEGG_AMYOTROPHIC_LATERAL_SCLEROSIS_ALS	1	1	1
Canonical Pathway	KEGG_ANTIGEN_PROCESSING_AND_PRESENTATION	1	1	1
Canonical Pathway	KEGG_APOPTOSIS	1	1	1
Canonical Pathway	KEGG_ARACHIDONIC_ACID_METABOLISM	1	1	1
Canonical Pathway	KEGG_ARGININE_AND_PROLINE_METABOLISM	1	1	1
Canonical Pathway	KEGG_ARRHYTHMOGENIC_RIGHT_VENTRICULAR_CARDIOMYOPATHY_ARVC	1	1	1
Canonical Pathway	KEGG_ASTHMA	1	1	1
Canonical Pathway	KEGG_AUTOIMMUNE_THYROID_DISEASE	1	1	1
Canonical Pathway	KEGG_AXON_GUIDANCE	1	1	1
Canonical Pathway	KEGG_B_CELL_RECEPTOR_SIGNALING_PATHWAY	1	1	1
Canonical Pathway	KEGG_BASAL_CELL_CARCINOMA	1	1	1
Canonical Pathway	KEGG_BASAL_TRANSCRIPTION_FACTORS	1	1	1
Canonical Pathway	KEGG_BASE_EXCISION_REPAIR	1	1	1
Canonical Pathway	KEGG_BETA_ALANINE_METABOLISM	1	1	1
Canonical Pathway	KEGG_BIOSYNTHESIS_OF_UNSATURATED_FATTY_ACIDS	1	1	1
Canonical Pathway	KEGG_BLADDER_CANCER	1	1	1
Canonical Pathway	KEGG_BUTANOATE_METABOLISM	1	1	1
Canonical Pathway	KEGG_CALCIUM_SIGNALING_PATHWAY	1	1	1
Canonical Pathway	KEGG_CARDIAC_MUSCLE_CONTRACTION	1	1	1
Canonical Pathway	KEGG_CELL_ADHESION_MOLECULES_CAMS	1	1	1
Canonical Pathway	KEGG_CELL_CYCLE	1	1	1
Canonical Pathway	KEGG_CHEMOKINE_SIGNALING_PATHWAY	1	1	1
Canonical Pathway	KEGG_CHRONIC_MYELOID_LEUKEMIA	1	1	1
Canonical Pathway	KEGG_CITRATE_CYCLE_TCA_CYCLE	1	1	1
Canonical Pathway	KEGG_COLORECTAL_CANCER	1	1	1
Canonical Pathway	KEGG_COMPLEMENT_AND_COAGULATION_CASCADES	1	1	1
Canonical Pathway	KEGG_CYSTEINE_AND_METHIONINE_METABOLISM	1	1	1
Canonical Pathway	KEGG_CYTOKINE_CYTOKINE_RECEPTOR_INTERACTION	1	1	1
Canonical Pathway	KEGG_CYTOSOLIC_DNA_SENSING_PATHWAY	1	1	1
Canonical Pathway	KEGG_DILATED_CARDIOMYOPATHY	1	1	1
Canonical Pathway	KEGG_DNA_REPLICATION	1	1	1
Canonical Pathway	KEGG_DORSO_VENTRAL_AXIS_FORMATION	1	1	1
Canonical Pathway	KEGG_DRUG_METABOLISM_CYTOCHROME_P450	1	1	1
Canonical Pathway	KEGG_DRUG_METABOLISM_OTHER_ENZYMES	1	1	1
Canonical Pathway	KEGG_ECM_RECEPTOR_INTERACTION	1	1	1
Canonical Pathway	KEGG_ENDOCYTOSIS	1	1	1
Canonical Pathway	KEGG_ENDOMETRIAL_CANCER	1	1	1
Canonical Pathway	KEGG_EPITHELIAL_CELL_SIGNALING_IN_HELICOBACTER_PYLORI_INFECTION	1	1	1
Canonical Pathway	KEGG_ERBB_SIGNALING_PATHWAY	1	1	1
Canonical Pathway	KEGG_ETHER_LIPID_METABOLISM	1	1	1
Canonical Pathway	KEGG_FATTY_ACID_METABOLISM	1	1	1
Canonical Pathway	KEGG_FC_EPSILON_RI_SIGNALING_PATHWAY	1	1	1
Canonical Pathway	KEGG_FC_GAMMA_R_MEDIATED_PHAGOCYTOSIS	1	1	1
Canonical Pathway	KEGG_FOCAL_ADHESION	1	1	1
Canonical Pathway	KEGG_FRUCTOSE_AND_MANNOSE_METABOLISM	1	1	1
Canonical Pathway	KEGG_GALACTOSE_METABOLISM	1	1	1
Canonical Pathway	KEGG_GAP_JUNCTION	1	1	1
Canonical Pathway	KEGG_GLIOMA	1	1	1
Canonical Pathway	KEGG_GLUTATHIONE_METABOLISM	1	1	1
Canonical Pathway	KEGG_GLYCEROLIPID_METABOLISM	1	1	1
Canonical Pathway	KEGG_GLYCEROPHOSPHOLIPID_METABOLISM	1	1	1
Canonical Pathway	KEGG_GLYCINE_SERINE_AND_THREONINE_METABOLISM	1	1	1
Canonical Pathway	KEGG_GLYCOLYSIS_GLUCONEOGENESIS	1	1	1
Canonical Pathway	KEGG_GLYCOSAMINOGLYCAN_BIOSYNTHESIS_CHONDROITIN_SULFATE	1	1	1
Canonical Pathway	KEGG_GLYCOSAMINOGLYCAN_BIOSYNTHESIS_HEPARAN_SULFATE	1	1	1
Canonical Pathway	KEGG_GLYCOSAMINOGLYCAN_DEGRADATION	1	1	1
Canonical Pathway	KEGG_GLYCOSPHINGOLIPID_BIOSYNTHESIS_GANGLIO_SERIES	1	1	1
Canonical Pathway	KEGG_GLYCOSPHINGOLIPID_BIOSYNTHESIS_LACTO_AND_NEOLACTO_SERIES	1	1	1
Canonical Pathway	KEGG_GLYCOSYLPHOSPHATIDYLINOSITOL_GPI_ANCHOR_BIOSYNTHESIS	1	1	1
Canonical Pathway	KEGG_GLYOXYLATE_AND_DICARBOXYLATE_METABOLISM	1	1	1
Canonical Pathway	KEGG_GNRH_SIGNALING_PATHWAY	1	1	1
Canonical Pathway	KEGG_GRAFT_VERSUS_HOST_DISEASE	1	1	1
Canonical Pathway	KEGG_HEDGEHOG_SIGNALING_PATHWAY	1	1	1
Canonical Pathway	KEGG_HEMATOPOIETIC_CELL_LINEAGE	1	1	1
Canonical Pathway	KEGG_HISTIDINE_METABOLISM	1	1	1
Canonical Pathway	KEGG_HOMOLOGOUS_RECOMBINATION	1	1	1
Canonical Pathway	KEGG_HUNTINGTONS_DISEASE	1	1	1
Canonical Pathway	KEGG_HYPERTROPHIC_CARDIOMYOPATHY_HCM	1	1	1
Canonical Pathway	KEGG_INOSITOL_PHOSPHATE_METABOLISM	1	1	1
Canonical Pathway	KEGG_INSULIN_SIGNALING_PATHWAY	1	1	1
Canonical Pathway	KEGG_INTESTINAL_IMMUNE_NETWORK_FOR_IGA_PRODUCTION	1	1	1
Canonical Pathway	KEGG_JAK_STAT_SIGNALING_PATHWAY	1	1	1
Canonical Pathway	KEGG_LEISHMANIA_INFECTION	1	1	1
Canonical Pathway	KEGG_LEUKOCYTE_TRANSENDOTHELIAL_MIGRATION	1	1	1
Canonical Pathway	KEGG_LINOLEIC_ACID_METABOLISM	1	1	1
Canonical Pathway	KEGG_LONG_TERM_DEPRESSION	1	1	1
Canonical Pathway	KEGG_LONG_TERM_POTENTIATION	1	1	1
Canonical Pathway	KEGG_LYSINE_DEGRADATION	1	1	1
Canonical Pathway	KEGG_LYSOSOME	1	1	1
Canonical Pathway	KEGG_MAPK_SIGNALING_PATHWAY	1	1	1
Canonical Pathway	KEGG_MELANOGENESIS	1	1	1
Canonical Pathway	KEGG_MELANOMA	1	1	1
Canonical Pathway	KEGG_METABOLISM_OF_XENOBIOTICS_BY_CYTOCHROME_P450	1	1	1
Canonical Pathway	KEGG_MISMATCH_REPAIR	1	1	1
Canonical Pathway	KEGG_MTOR_SIGNALING_PATHWAY	1	1	1
Canonical Pathway	KEGG_N_GLYCAN_BIOSYNTHESIS	1	1	1
Canonical Pathway	KEGG_NATURAL_KILLER_CELL_MEDIATED_CYTOTOXICITY	1	1	1
Canonical Pathway	KEGG_NEUROACTIVE_LIGAND_RECEPTOR_INTERACTION	1	1	1
Canonical Pathway	KEGG_NEUROTROPHIN_SIGNALING_PATHWAY	1	1	1
Canonical Pathway	KEGG_NICOTINATE_AND_NICOTINAMIDE_METABOLISM	1	1	1
Canonical Pathway	KEGG_NITROGEN_METABOLISM	1	1	1
Canonical Pathway	KEGG_NOD_LIKE_RECEPTOR_SIGNALING_PATHWAY	1	1	1
Canonical Pathway	KEGG_NON_SMALL_CELL_LUNG_CANCER	1	1	1
Canonical Pathway	KEGG_NOTCH_SIGNALING_PATHWAY	1	1	1
Canonical Pathway	KEGG_NUCLEOTIDE_EXCISION_REPAIR	1	1	1
Canonical Pathway	KEGG_O_GLYCAN_BIOSYNTHESIS	1	1	1
Canonical Pathway	KEGG_OLFACTORY_TRANSDUCTION	1	1	1
Canonical Pathway	KEGG_ONE_CARBON_POOL_BY_FOLATE	1	1	1
Canonical Pathway	KEGG_OOCYTE_MEIOSIS	1	1	1
Canonical Pathway	KEGG_OTHER_GLYCAN_DEGRADATION	1	1	1
Canonical Pathway	KEGG_OXIDATIVE_PHOSPHORYLATION	1	1	1
Canonical Pathway	KEGG_P53_SIGNALING_PATHWAY	1	1	1
Canonical Pathway	KEGG_PANCREATIC_CANCER	1	1	1
Canonical Pathway	KEGG_PANTOTHENATE_AND_COA_BIOSYNTHESIS	1	1	1
Canonical Pathway	KEGG_PARKINSONS_DISEASE	1	1	1
Canonical Pathway	KEGG_PATHOGENIC_ESCHERICHIA_COLI_INFECTION	1	1	1
Canonical Pathway	KEGG_PATHWAYS_IN_CANCER	1	1	1
Canonical Pathway	KEGG_PENTOSE_PHOSPHATE_PATHWAY	1	1	1
Canonical Pathway	KEGG_PEROXISOME	1	1	1
Canonical Pathway	KEGG_PHOSPHATIDYLINOSITOL_SIGNALING_SYSTEM	1	1	1
Canonical Pathway	KEGG_PORPHYRIN_AND_CHLOROPHYLL_METABOLISM	1	1	1
Canonical Pathway	KEGG_PPAR_SIGNALING_PATHWAY	1	1	1
Canonical Pathway	KEGG_PRIMARY_BILE_ACID_BIOSYNTHESIS	1	1	1
Canonical Pathway	KEGG_PRIMARY_IMMUNODEFICIENCY	1	1	1
Canonical Pathway	KEGG_PRION_DISEASES	1	1	1
Canonical Pathway	KEGG_PROGESTERONE_MEDIATED_OOCYTE_MATURATION	1	1	1
Canonical Pathway	KEGG_PROPANOATE_METABOLISM	1	1	1
Canonical Pathway	KEGG_PROSTATE_CANCER	1	1	1
Canonical Pathway	KEGG_PROTEASOME	1	1	1
Canonical Pathway	KEGG_PROXIMAL_TUBULE_BICARBONATE_RECLAMATION	1	1	1
Canonical Pathway	KEGG_PURINE_METABOLISM	1	1	1
Canonical Pathway	KEGG_PYRIMIDINE_METABOLISM	1	1	1
Canonical Pathway	KEGG_PYRUVATE_METABOLISM	1	1	1
Canonical Pathway	KEGG_REGULATION_OF_ACTIN_CYTOSKELETON	1	1	1
Canonical Pathway	KEGG_REGULATION_OF_AUTOPHAGY	1	1	1
Canonical Pathway	KEGG_RENAL_CELL_CARCINOMA	1	1	1
Canonical Pathway	KEGG_RETINOL_METABOLISM	1	1	1
Canonical Pathway	KEGG_RIBOFLAVIN_METABOLISM	1	1	1
Canonical Pathway	KEGG_RIBOSOME	1	1	1
Canonical Pathway	KEGG_RIG_I_LIKE_RECEPTOR_SIGNALING_PATHWAY	1	1	1
Canonical Pathway	KEGG_RNA_DEGRADATION	1	1	1
Canonical Pathway	KEGG_RNA_POLYMERASE	1	1	1
Canonical Pathway	KEGG_SELENOAMINO_ACID_METABOLISM	1	1	1
Canonical Pathway	KEGG_SMALL_CELL_LUNG_CANCER	1	1	1
Canonical Pathway	KEGG_SNARE_INTERACTIONS_IN_VESICULAR_TRANSPORT	1	1	1
Canonical Pathway	KEGG_SPHINGOLIPID_METABOLISM	1	1	1
Canonical Pathway	KEGG_SPLICEOSOME	1	1	1
Canonical Pathway	KEGG_STARCH_AND_SUCROSE_METABOLISM	1	1	1
Canonical Pathway	KEGG_STEROID_BIOSYNTHESIS	1	1	1
Canonical Pathway	KEGG_STEROID_HORMONE_BIOSYNTHESIS	1	1	1
Canonical Pathway	KEGG_SULFUR_METABOLISM	1	1	1
Canonical Pathway	KEGG_SYSTEMIC_LUPUS_ERYTHEMATOSUS	1	1	1
Canonical Pathway	KEGG_T_CELL_RECEPTOR_SIGNALING_PATHWAY	1	1	1
Canonical Pathway	KEGG_TASTE_TRANSDUCTION	1	1	1
Canonical Pathway	KEGG_TGF_BETA_SIGNALING_PATHWAY	1	1	1
Canonical Pathway	KEGG_THYROID_CANCER	1	1	1
Canonical Pathway	KEGG_TIGHT_JUNCTION	1	1	1
Canonical Pathway	KEGG_TOLL_LIKE_RECEPTOR_SIGNALING_PATHWAY	1	1	1
Canonical Pathway	KEGG_TRYPTOPHAN_METABOLISM	1	1	1
Canonical Pathway	KEGG_TYPE_I_DIABETES_MELLITUS	1	1	1
Canonical Pathway	KEGG_TYPE_II_DIABETES_MELLITUS	1	1	1
Canonical Pathway	KEGG_TYROSINE_METABOLISM	1	1	1
Canonical Pathway	KEGG_UBIQUITIN_MEDIATED_PROTEOLYSIS	1	1	1
Canonical Pathway	KEGG_VALINE_LEUCINE_AND_ISOLEUCINE_DEGRADATION	1	1	1
Canonical Pathway	KEGG_VASCULAR_SMOOTH_MUSCLE_CONTRACTION	1	1	1
Canonical Pathway	KEGG_VASOPRESSIN_REGULATED_WATER_REABSORPTION	1	1	1
Canonical Pathway	KEGG_VEGF_SIGNALING_PATHWAY	1	1	1
Canonical Pathway	KEGG_VIBRIO_CHOLERAE_INFECTION	1	1	1
Canonical Pathway	KEGG_VIRAL_MYOCARDITIS	1	1	1
Canonical Pathway	KEGG_WNT_SIGNALING_PATHWAY	1	1	1
Canonical Pathway	REACTOME_A_TETRASACCHARIDE_LINKER_SEQUENCE_IS_REQUIRED_FOR_GAG_SYNTHESIS	1	1	1
Canonical Pathway	REACTOME_ABC_FAMILY_PROTEINS_MEDIATED_TRANSPORT	1	1	1
Canonical Pathway	REACTOME_ABC_TRANSPORTER_DISORDERS	1	1	1
Canonical Pathway	REACTOME_ABERRANT_REGULATION_OF_MITOTIC_EXIT_IN_CANCER_DUE_TO_RB1_DEFECTS	1	1	1
Canonical Pathway	REACTOME_ABORTIVE_ELONGATION_OF_HIV_1_TRANSCRIPT_IN_THE_ABSENCE_OF_TAT	1	1	1
Canonical Pathway	REACTOME_ACETYLCHOLINE_BINDING_AND_DOWNSTREAM_EVENTS	1	1	1
Canonical Pathway	REACTOME_ACETYLCHOLINE_NEUROTRANSMITTER_RELEASE_CYCLE	1	1	1
Canonical Pathway	REACTOME_ACTIVATED_NOTCH1_TRANSMITS_SIGNAL_TO_THE_NUCLEUS	1	1	1
Canonical Pathway	REACTOME_ACTIVATION_OF_AMPK_DOWNSTREAM_OF_NMDARS	1	1	1
Canonical Pathway	REACTOME_ACTIVATION_OF_ANTERIOR_HOX_GENES_IN_HINDBRAIN_DEVELOPMENT_DURING_EARLY_EMBRYOGENESIS	1	1	1
Canonical Pathway	REACTOME_ACTIVATION_OF_ATR_IN_RESPONSE_TO_REPLICATION_STRESS	1	1	1
Canonical Pathway	REACTOME_ACTIVATION_OF_BAD_AND_TRANSLOCATION_TO_MITOCHONDRIA	1	1	1
Canonical Pathway	REACTOME_ACTIVATION_OF_BH3_ONLY_PROTEINS	1	1	1
Canonical Pathway	REACTOME_ACTIVATION_OF_GENE_EXPRESSION_BY_SREBF_SREBP	1	1	1
Canonical Pathway	REACTOME_ACTIVATION_OF_IRF3_IRF7_MEDIATED_BY_TBK1_IKK_EPSILON	1	1	1
Canonical Pathway	REACTOME_ACTIVATION_OF_KAINATE_RECEPTORS_UPON_GLUTAMATE_BINDING	1	1	1
Canonical Pathway	REACTOME_ACTIVATION_OF_MATRIX_METALLOPROTEINASES	1	1	1
Canonical Pathway	REACTOME_ACTIVATION_OF_NMDA_RECEPTORS_AND_POSTSYNAPTIC_EVENTS	1	1	1
Canonical Pathway	REACTOME_ACTIVATION_OF_RAC1	1	1	1
Canonical Pathway	REACTOME_ACTIVATION_OF_SMO	1	1	1
Canonical Pathway	REACTOME_ACTIVATION_OF_THE_MRNA_UPON_BINDING_OF_THE_CAP_BINDING_COMPLEX_AND_EIFS_AND_SUBSEQUENT_BINDING_TO_43S	1	1	1
Canonical Pathway	REACTOME_ACTIVATION_OF_THE_PRE_REPLICATIVE_COMPLEX	1	1	1
Canonical Pathway	REACTOME_ACYL_CHAIN_REMODELLING_OF_PC	1	1	1
Canonical Pathway	REACTOME_ACYL_CHAIN_REMODELLING_OF_PE	1	1	1
Canonical Pathway	REACTOME_ACYL_CHAIN_REMODELLING_OF_PG	1	1	1
Canonical Pathway	REACTOME_ACYL_CHAIN_REMODELLING_OF_PI	1	1	1
Canonical Pathway	REACTOME_ACYL_CHAIN_REMODELLING_OF_PS	1	1	1
Canonical Pathway	REACTOME_ADAPTIVE_IMMUNE_SYSTEM	1	1	1
Canonical Pathway	REACTOME_ADENYLATE_CYCLASE_INHIBITORY_PATHWAY	1	1	1
Canonical Pathway	REACTOME_ADHERENS_JUNCTIONS_INTERACTIONS	1	1	1
Canonical Pathway	REACTOME_ADORA2B_MEDIATED_ANTI_INFLAMMATORY_CYTOKINES_PRODUCTION	1	1	1
Canonical Pathway	REACTOME_ADP_SIGNALLING_THROUGH_P2Y_PURINOCEPTOR_1	1	1	1
Canonical Pathway	REACTOME_ADP_SIGNALLING_THROUGH_P2Y_PURINOCEPTOR_12	1	1	1
Canonical Pathway	REACTOME_ADRENALINE_NORADRENALINE_INHIBITS_INSULIN_SECRETION	1	1	1
Canonical Pathway	REACTOME_AGGREPHAGY	1	1	1
Canonical Pathway	REACTOME_AKT_PHOSPHORYLATES_TARGETS_IN_THE_CYTOSOL	1	1	1
Canonical Pathway	REACTOME_AMINE_LIGAND_BINDING_RECEPTORS	1	1	1
Canonical Pathway	REACTOME_AMINO_ACID_TRANSPORT_ACROSS_THE_PLASMA_MEMBRANE	1	1	1
Canonical Pathway	REACTOME_AMINO_ACIDS_REGULATE_MTORC1	1	1	1
Canonical Pathway	REACTOME_AMYLOID_FIBER_FORMATION	1	1	1
Canonical Pathway	REACTOME_ANCHORING_OF_THE_BASAL_BODY_TO_THE_PLASMA_MEMBRANE	1	1	1
Canonical Pathway	REACTOME_ANTI_INFLAMMATORY_RESPONSE_FAVOURING_LEISHMANIA_PARASITE_INFECTION	1	1	1
Canonical Pathway	REACTOME_ANTIGEN_ACTIVATES_B_CELL_RECEPTOR_BCR_LEADING_TO_GENERATION_OF_SECOND_MESSENGERS	1	1	1
Canonical Pathway	REACTOME_ANTIGEN_PRESENTATION_FOLDING_ASSEMBLY_AND_PEPTIDE_LOADING_OF_CLASS_I_MHC	1	1	1
Canonical Pathway	REACTOME_ANTIGEN_PROCESSING_CROSS_PRESENTATION	1	1	1
Canonical Pathway	REACTOME_ANTIGEN_PROCESSING_UBIQUITINATION_PROTEASOME_DEGRADATION	1	1	1
Canonical Pathway	REACTOME_ANTIMICROBIAL_PEPTIDES	1	1	1
Canonical Pathway	REACTOME_ANTIVIRAL_MECHANISM_BY_IFN_STIMULATED_GENES	1	1	1
Canonical Pathway	REACTOME_APC_C_CDC20_MEDIATED_DEGRADATION_OF_CYCLIN_B	1	1	1
Canonical Pathway	REACTOME_APC_C_CDH1_MEDIATED_DEGRADATION_OF_CDC20_AND_OTHER_APC_C_CDH1_TARGETED_PROTEINS_IN_LATE_MITOSIS_EARLY_G1	1	1	1
Canonical Pathway	REACTOME_APC_C_MEDIATED_DEGRADATION_OF_CELL_CYCLE_PROTEINS	1	1	1
Canonical Pathway	REACTOME_APC_CDC20_MEDIATED_DEGRADATION_OF_NEK2A	1	1	1
Canonical Pathway	REACTOME_APOPTOSIS	1	1	1
Canonical Pathway	REACTOME_APOPTOTIC_CLEAVAGE_OF_CELLULAR_PROTEINS	1	1	1
Canonical Pathway	REACTOME_APOPTOTIC_EXECUTION_PHASE	1	1	1
Canonical Pathway	REACTOME_APOPTOTIC_FACTOR_MEDIATED_RESPONSE	1	1	1
Canonical Pathway	REACTOME_AQUAPORIN_MEDIATED_TRANSPORT	1	1	1
Canonical Pathway	REACTOME_ARACHIDONATE_PRODUCTION_FROM_DAG	1	1	1
Canonical Pathway	REACTOME_ARACHIDONIC_ACID_METABOLISM	1	1	1
Canonical Pathway	REACTOME_ASPARAGINE_N_LINKED_GLYCOSYLATION	1	1	1
Canonical Pathway	REACTOME_ASSEMBLY_AND_CELL_SURFACE_PRESENTATION_OF_NMDA_RECEPTORS	1	1	1
Canonical Pathway	REACTOME_ASSEMBLY_OF_COLLAGEN_FIBRILS_AND_OTHER_MULTIMERIC_STRUCTURES	1	1	1
Canonical Pathway	REACTOME_ASSEMBLY_OF_THE_HIV_VIRION	1	1	1
Canonical Pathway	REACTOME_ASSEMBLY_OF_THE_PRE_REPLICATIVE_COMPLEX	1	1	1
Canonical Pathway	REACTOME_ASSOCIATION_OF_TRIC_CCT_WITH_TARGET_PROTEINS_DURING_BIOSYNTHESIS	1	1	1
Canonical Pathway	REACTOME_ASYMMETRIC_LOCALIZATION_OF_PCP_PROTEINS	1	1	1
Canonical Pathway	REACTOME_ATF4_ACTIVATES_GENES_IN_RESPONSE_TO_ENDOPLASMIC_RETICULUM_STRESS	1	1	1
Canonical Pathway	REACTOME_AUF1_HNRNP_D0_BINDS_AND_DESTABILIZES_MRNA	1	1	1
Canonical Pathway	REACTOME_AURKA_ACTIVATION_BY_TPX2	1	1	1
Canonical Pathway	REACTOME_AUTOPHAGY	1	1	1
Canonical Pathway	REACTOME_B_WICH_COMPLEX_POSITIVELY_REGULATES_RRNA_EXPRESSION	1	1	1
Canonical Pathway	REACTOME_BASE_EXCISION_REPAIR	1	1	1
Canonical Pathway	REACTOME_BASIGIN_INTERACTIONS	1	1	1
Canonical Pathway	REACTOME_BBSOME_MEDIATED_CARGO_TARGETING_TO_CILIUM	1	1	1
Canonical Pathway	REACTOME_BETA_CATENIN_INDEPENDENT_WNT_SIGNALING	1	1	1
Canonical Pathway	REACTOME_BILE_ACID_AND_BILE_SALT_METABOLISM	1	1	1
Canonical Pathway	REACTOME_BINDING_AND_UPTAKE_OF_LIGANDS_BY_SCAVENGER_RECEPTORS	1	1	1
Canonical Pathway	REACTOME_BIOLOGICAL_OXIDATIONS	1	1	1
Canonical Pathway	REACTOME_BIOSYNTHESIS_OF_EPA_DERIVED_SPMS	1	1	1
Canonical Pathway	REACTOME_BIOSYNTHESIS_OF_MARESINS	1	1	1
Canonical Pathway	REACTOME_BIOSYNTHESIS_OF_SPECIALIZED_PRORESOLVING_MEDIATORS_SPMS	1	1	1
Canonical Pathway	REACTOME_BIOSYNTHESIS_OF_THE_N_GLYCAN_PRECURSOR_DOLICHOL_LIPID_LINKED_OLIGOSACCHARIDE_LLO_AND_TRANSFER_TO_A_NASCENT_PROTEIN	1	1	1
Canonical Pathway	REACTOME_BLOOD_GROUP_SYSTEMS_BIOSYNTHESIS	1	1	1
Canonical Pathway	REACTOME_BRANCHED_CHAIN_AMINO_ACID_CATABOLISM	1	1	1
Canonical Pathway	REACTOME_BUDDING_AND_MATURATION_OF_HIV_VIRION	1	1	1
Canonical Pathway	REACTOME_BUTYRATE_RESPONSE_FACTOR_1_BRF1_BINDS_AND_DESTABILIZES_MRNA	1	1	1
Canonical Pathway	REACTOME_BUTYROPHILIN_BTN_FAMILY_INTERACTIONS	1	1	1
Canonical Pathway	REACTOME_C_TYPE_LECTIN_RECEPTORS_CLRS	1	1	1
Canonical Pathway	REACTOME_CA_DEPENDENT_EVENTS	1	1	1
Canonical Pathway	REACTOME_CA2_ACTIVATED_K_CHANNELS	1	1	1
Canonical Pathway	REACTOME_CA2_PATHWAY	1	1	1
Canonical Pathway	REACTOME_CALNEXIN_CALRETICULIN_CYCLE	1	1	1
Canonical Pathway	REACTOME_CARBOXYTERMINAL_POST_TRANSLATIONAL_MODIFICATIONS_OF_TUBULIN	1	1	1
Canonical Pathway	REACTOME_CARDIAC_CONDUCTION	1	1	1
Canonical Pathway	REACTOME_CARGO_CONCENTRATION_IN_THE_ER	1	1	1
Canonical Pathway	REACTOME_CARGO_RECOGNITION_FOR_CLATHRIN_MEDIATED_ENDOCYTOSIS	1	1	1
Canonical Pathway	REACTOME_CARGO_TRAFFICKING_TO_THE_PERICILIARY_MEMBRANE	1	1	1
Canonical Pathway	REACTOME_CARNITINE_METABOLISM	1	1	1
Canonical Pathway	REACTOME_CASPASE_ACTIVATION_VIA_DEATH_RECEPTORS_IN_THE_PRESENCE_OF_LIGAND	1	1	1
Canonical Pathway	REACTOME_CASPASE_ACTIVATION_VIA_EXTRINSIC_APOPTOTIC_SIGNALLING_PATHWAY	1	1	1
Canonical Pathway	REACTOME_CASPASE_MEDIATED_CLEAVAGE_OF_CYTOSKELETAL_PROTEINS	1	1	1
Canonical Pathway	REACTOME_CD209_DC_SIGN_SIGNALING	1	1	1
Canonical Pathway	REACTOME_CD28_CO_STIMULATION	1	1	1
Canonical Pathway	REACTOME_CD28_DEPENDENT_PI3K_AKT_SIGNALING	1	1	1
Canonical Pathway	REACTOME_CDC42_GTPASE_CYCLE	1	1	1
Canonical Pathway	REACTOME_CELL_CELL_COMMUNICATION	1	1	1
Canonical Pathway	REACTOME_CELL_CELL_JUNCTION_ORGANIZATION	1	1	1
Canonical Pathway	REACTOME_CELL_CYCLE	1	1	1
Canonical Pathway	REACTOME_CELL_CYCLE_CHECKPOINTS	1	1	1
Canonical Pathway	REACTOME_CELL_CYCLE_MITOTIC	1	1	1
Canonical Pathway	REACTOME_CELL_DEATH_SIGNALLING_VIA_NRAGE_NRIF_AND_NADE	1	1	1
Canonical Pathway	REACTOME_CELL_EXTRACELLULAR_MATRIX_INTERACTIONS	1	1	1
Canonical Pathway	REACTOME_CELL_JUNCTION_ORGANIZATION	1	1	1
Canonical Pathway	REACTOME_CELL_SURFACE_INTERACTIONS_AT_THE_VASCULAR_WALL	1	1	1
Canonical Pathway	REACTOME_CELLULAR_HEXOSE_TRANSPORT	1	1	1
Canonical Pathway	REACTOME_CELLULAR_RESPONSE_TO_CHEMICAL_STRESS	1	1	1
Canonical Pathway	REACTOME_CELLULAR_RESPONSE_TO_HEAT_STRESS	1	1	1
Canonical Pathway	REACTOME_CELLULAR_RESPONSE_TO_HYPOXIA	1	1	1
Canonical Pathway	REACTOME_CELLULAR_RESPONSE_TO_STARVATION	1	1	1
Canonical Pathway	REACTOME_CELLULAR_RESPONSES_TO_EXTERNAL_STIMULI	1	1	1
Canonical Pathway	REACTOME_CELLULAR_SENESCENCE	1	1	1
Canonical Pathway	REACTOME_CGMP_EFFECTS	1	1	1
Canonical Pathway	REACTOME_CHAPERONE_MEDIATED_AUTOPHAGY	1	1	1
Canonical Pathway	REACTOME_CHEMOKINE_RECEPTORS_BIND_CHEMOKINES	1	1	1
Canonical Pathway	REACTOME_CHK1_CHK2_CDS1_MEDIATED_INACTIVATION_OF_CYCLIN_B_CDK1_COMPLEX	1	1	1
Canonical Pathway	REACTOME_CHL1_INTERACTIONS	1	1	1
Canonical Pathway	REACTOME_CHOLESTEROL_BIOSYNTHESIS	1	1	1
Canonical Pathway	REACTOME_CHONDROITIN_SULFATE_BIOSYNTHESIS	1	1	1
Canonical Pathway	REACTOME_CHONDROITIN_SULFATE_DERMATAN_SULFATE_METABOLISM	1	1	1
Canonical Pathway	REACTOME_CHROMATIN_MODIFYING_ENZYMES	1	1	1
Canonical Pathway	REACTOME_CHROMOSOME_MAINTENANCE	1	1	1
Canonical Pathway	REACTOME_CILIUM_ASSEMBLY	1	1	1
Canonical Pathway	REACTOME_CIRCADIAN_CLOCK	1	1	1
Canonical Pathway	REACTOME_CITRIC_ACID_CYCLE_TCA_CYCLE	1	1	1
Canonical Pathway	REACTOME_CLASS_A_1_RHODOPSIN_LIKE_RECEPTORS	1	1	1
Canonical Pathway	REACTOME_CLASS_B_2_SECRETIN_FAMILY_RECEPTORS	1	1	1
Canonical Pathway	REACTOME_CLASS_C_3_METABOTROPIC_GLUTAMATE_PHEROMONE_RECEPTORS	1	1	1
Canonical Pathway	REACTOME_CLASS_I_MHC_MEDIATED_ANTIGEN_PROCESSING_PRESENTATION	1	1	1
Canonical Pathway	REACTOME_CLATHRIN_MEDIATED_ENDOCYTOSIS	1	1	1
Canonical Pathway	REACTOME_CLEC7A_DECTIN_1_SIGNALING	1	1	1
Canonical Pathway	REACTOME_COBALAMIN_CBL_VITAMIN_B12_TRANSPORT_AND_METABOLISM	1	1	1
Canonical Pathway	REACTOME_COLLAGEN_BIOSYNTHESIS_AND_MODIFYING_ENZYMES	1	1	1
Canonical Pathway	REACTOME_COLLAGEN_CHAIN_TRIMERIZATION	1	1	1
Canonical Pathway	REACTOME_COLLAGEN_DEGRADATION	1	1	1
Canonical Pathway	REACTOME_COLLAGEN_FORMATION	1	1	1
Canonical Pathway	REACTOME_COMPLEMENT_CASCADE	1	1	1
Canonical Pathway	REACTOME_COMPLEX_I_BIOGENESIS	1	1	1
Canonical Pathway	REACTOME_CONSTITUTIVE_SIGNALING_BY_ABERRANT_PI3K_IN_CANCER	1	1	1
Canonical Pathway	REACTOME_CONSTITUTIVE_SIGNALING_BY_AKT1_E17K_IN_CANCER	1	1	1
Canonical Pathway	REACTOME_CONVERSION_FROM_APC_C_CDC20_TO_APC_C_CDH1_IN_LATE_ANAPHASE	1	1	1
Canonical Pathway	REACTOME_COOPERATION_OF_PDCL_PHLP1_AND_TRIC_CCT_IN_G_PROTEIN_BETA_FOLDING	1	1	1
Canonical Pathway	REACTOME_COOPERATION_OF_PREFOLDIN_AND_TRIC_CCT_IN_ACTIN_AND_TUBULIN_FOLDING	1	1	1
Canonical Pathway	REACTOME_COPI_DEPENDENT_GOLGI_TO_ER_RETROGRADE_TRAFFIC	1	1	1
Canonical Pathway	REACTOME_COPI_INDEPENDENT_GOLGI_TO_ER_RETROGRADE_TRAFFIC	1	1	1
Canonical Pathway	REACTOME_COPI_MEDIATED_ANTEROGRADE_TRANSPORT	1	1	1
Canonical Pathway	REACTOME_COPII_MEDIATED_VESICLE_TRANSPORT	1	1	1
Canonical Pathway	REACTOME_COSTIMULATION_BY_THE_CD28_FAMILY	1	1	1
Canonical Pathway	REACTOME_CREB1_PHOSPHORYLATION_THROUGH_NMDA_RECEPTOR_MEDIATED_ACTIVATION_OF_RAS_SIGNALING	1	1	1
Canonical Pathway	REACTOME_CROSS_PRESENTATION_OF_SOLUBLE_EXOGENOUS_ANTIGENS_ENDOSOMES	1	1	1
Canonical Pathway	REACTOME_CS_DS_DEGRADATION	1	1	1
Canonical Pathway	REACTOME_CTLA4_INHIBITORY_SIGNALING	1	1	1
Canonical Pathway	REACTOME_CYCLIN_A_B1_B2_ASSOCIATED_EVENTS_DURING_G2_M_TRANSITION	1	1	1
Canonical Pathway	REACTOME_CYCLIN_A_CDK2_ASSOCIATED_EVENTS_AT_S_PHASE_ENTRY	1	1	1
Canonical Pathway	REACTOME_CYCLIN_D_ASSOCIATED_EVENTS_IN_G1	1	1	1
Canonical Pathway	REACTOME_CYTOCHROME_C_MEDIATED_APOPTOTIC_RESPONSE	1	1	1
Canonical Pathway	REACTOME_CYTOCHROME_P450_ARRANGED_BY_SUBSTRATE_TYPE	1	1	1
Canonical Pathway	REACTOME_CYTOKINE_SIGNALING_IN_IMMUNE_SYSTEM	1	1	1
Canonical Pathway	REACTOME_CYTOPROTECTION_BY_HMOX1	1	1	1
Canonical Pathway	REACTOME_CYTOSOLIC_SENSORS_OF_PATHOGEN_ASSOCIATED_DNA	1	1	1
Canonical Pathway	REACTOME_CYTOSOLIC_SULFONATION_OF_SMALL_MOLECULES	1	1	1
Canonical Pathway	REACTOME_DAG_AND_IP3_SIGNALING	1	1	1
Canonical Pathway	REACTOME_DAP12_INTERACTIONS	1	1	1
Canonical Pathway	REACTOME_DAP12_SIGNALING	1	1	1
Canonical Pathway	REACTOME_DARPP_32_EVENTS	1	1	1
Canonical Pathway	REACTOME_DCC_MEDIATED_ATTRACTIVE_SIGNALING	1	1	1
Canonical Pathway	REACTOME_DDX58_IFIH1_MEDIATED_INDUCTION_OF_INTERFERON_ALPHA_BETA	1	1	1
Canonical Pathway	REACTOME_DEACTIVATION_OF_THE_BETA_CATENIN_TRANSACTIVATING_COMPLEX	1	1	1
Canonical Pathway	REACTOME_DEADENYLATION_DEPENDENT_MRNA_DECAY	1	1	1
Canonical Pathway	REACTOME_DEADENYLATION_OF_MRNA	1	1	1
Canonical Pathway	REACTOME_DEATH_RECEPTOR_SIGNALLING	1	1	1
Canonical Pathway	REACTOME_DECTIN_1_MEDIATED_NONCANONICAL_NF_KB_SIGNALING	1	1	1
Canonical Pathway	REACTOME_DEFECTIVE_B4GALT7_CAUSES_EDS_PROGEROID_TYPE	1	1	1
Canonical Pathway	REACTOME_DEFECTIVE_CFTR_CAUSES_CYSTIC_FIBROSIS	1	1	1
Canonical Pathway	REACTOME_DEFECTIVE_EXT2_CAUSES_EXOSTOSES_2	1	1	1
Canonical Pathway	REACTOME_DEFECTS_IN_COBALAMIN_B12_METABOLISM	1	1	1
Canonical Pathway	REACTOME_DEFECTS_IN_VITAMIN_AND_COFACTOR_METABOLISM	1	1	1
Canonical Pathway	REACTOME_DEGRADATION_OF_AXIN	1	1	1
Canonical Pathway	REACTOME_DEGRADATION_OF_BETA_CATENIN_BY_THE_DESTRUCTION_COMPLEX	1	1	1
Canonical Pathway	REACTOME_DEGRADATION_OF_CYSTEINE_AND_HOMOCYSTEINE	1	1	1
Canonical Pathway	REACTOME_DEGRADATION_OF_DVL	1	1	1
Canonical Pathway	REACTOME_DEGRADATION_OF_GLI1_BY_THE_PROTEASOME	1	1	1
Canonical Pathway	REACTOME_DEGRADATION_OF_THE_EXTRACELLULAR_MATRIX	1	1	1
Canonical Pathway	REACTOME_DEPOLYMERISATION_OF_THE_NUCLEAR_LAMINA	1	1	1
Canonical Pathway	REACTOME_DEPOSITION_OF_NEW_CENPA_CONTAINING_NUCLEOSOMES_AT_THE_CENTROMERE	1	1	1
Canonical Pathway	REACTOME_DEREGULATED_CDK5_TRIGGERS_MULTIPLE_NEURODEGENERATIVE_PATHWAYS_IN_ALZHEIMER_S_DISEASE_MODELS	1	1	1
Canonical Pathway	REACTOME_DETOXIFICATION_OF_REACTIVE_OXYGEN_SPECIES	1	1	1
Canonical Pathway	REACTOME_DEUBIQUITINATION	1	1	1
Canonical Pathway	REACTOME_DEVELOPMENTAL_BIOLOGY	1	1	1
Canonical Pathway	REACTOME_DISASSEMBLY_OF_THE_DESTRUCTION_COMPLEX_AND_RECRUITMENT_OF_AXIN_TO_THE_MEMBRANE	1	1	1
Canonical Pathway	REACTOME_DISEASES_ASSOCIATED_WITH_GLYCOSAMINOGLYCAN_METABOLISM	1	1	1
Canonical Pathway	REACTOME_DISEASES_ASSOCIATED_WITH_GLYCOSYLATION_PRECURSOR_BIOSYNTHESIS	1	1	1
Canonical Pathway	REACTOME_DISEASES_ASSOCIATED_WITH_N_GLYCOSYLATION_OF_PROTEINS	1	1	1
Canonical Pathway	REACTOME_DISEASES_ASSOCIATED_WITH_O_GLYCOSYLATION_OF_PROTEINS	1	1	1
Canonical Pathway	REACTOME_DISEASES_OF_CARBOHYDRATE_METABOLISM	1	1	1
Canonical Pathway	REACTOME_DISEASES_OF_DNA_REPAIR	1	1	1
Canonical Pathway	REACTOME_DISEASES_OF_GLYCOSYLATION	1	1	0.00823448
Canonical Pathway	REACTOME_DISEASES_OF_IMMUNE_SYSTEM	1	1	1
Canonical Pathway	REACTOME_DISEASES_OF_METABOLISM	1	1	1
Canonical Pathway	REACTOME_DISEASES_OF_MITOTIC_CELL_CYCLE	1	1	1
Canonical Pathway	REACTOME_DISEASES_OF_PROGRAMMED_CELL_DEATH	1	1	1
Canonical Pathway	REACTOME_DISEASES_OF_SIGNAL_TRANSDUCTION_BY_GROWTH_FACTOR_RECEPTORS_AND_SECOND_MESSENGERS	1	1	1
Canonical Pathway	REACTOME_DISORDERS_OF_TRANSMEMBRANE_TRANSPORTERS	1	1	1
Canonical Pathway	REACTOME_DISSOLUTION_OF_FIBRIN_CLOT	1	1	1
Canonical Pathway	REACTOME_DNA_DAMAGE_BYPASS	1	1	1
Canonical Pathway	REACTOME_DNA_DAMAGE_RECOGNITION_IN_GG_NER	1	1	1
Canonical Pathway	REACTOME_DNA_DAMAGE_REVERSAL	1	1	1
Canonical Pathway	REACTOME_DNA_DOUBLE_STRAND_BREAK_REPAIR	1	1	1
Canonical Pathway	REACTOME_DNA_DOUBLE_STRAND_BREAK_RESPONSE	1	1	1
Canonical Pathway	REACTOME_DNA_REPAIR	1	1	1
Canonical Pathway	REACTOME_DNA_REPLICATION	1	1	1
Canonical Pathway	REACTOME_DNA_REPLICATION_PRE_INITIATION	1	1	1
Canonical Pathway	REACTOME_DNA_STRAND_ELONGATION	1	1	1
Canonical Pathway	REACTOME_DOPAMINE_NEUROTRANSMITTER_RELEASE_CYCLE	1	1	1
Canonical Pathway	REACTOME_DOWNREGULATION_OF_ERBB2_SIGNALING	1	1	1
Canonical Pathway	REACTOME_DOWNREGULATION_OF_TGF_BETA_RECEPTOR_SIGNALING	1	1	1
Canonical Pathway	REACTOME_DOWNSTREAM_SIGNAL_TRANSDUCTION	1	1	1
Canonical Pathway	REACTOME_DOWNSTREAM_SIGNALING_EVENTS_OF_B_CELL_RECEPTOR_BCR	1	1	1
Canonical Pathway	REACTOME_DOWNSTREAM_SIGNALING_OF_ACTIVATED_FGFR1	1	1	1
Canonical Pathway	REACTOME_DOWNSTREAM_SIGNALING_OF_ACTIVATED_FGFR2	1	1	1
Canonical Pathway	REACTOME_DOWNSTREAM_SIGNALING_OF_ACTIVATED_FGFR3	1	1	1
Canonical Pathway	REACTOME_DOWNSTREAM_SIGNALING_OF_ACTIVATED_FGFR4	1	1	1
Canonical Pathway	REACTOME_DSCAM_INTERACTIONS	1	1	1
Canonical Pathway	REACTOME_DUAL_INCISION_IN_GG_NER	1	1	1
Canonical Pathway	REACTOME_DUAL_INCISION_IN_TC_NER	1	1	1
Canonical Pathway	REACTOME_E2F_MEDIATED_REGULATION_OF_DNA_REPLICATION	1	1	1
Canonical Pathway	REACTOME_E3_UBIQUITIN_LIGASES_UBIQUITINATE_TARGET_PROTEINS	1	1	1
Canonical Pathway	REACTOME_EARLY_PHASE_OF_HIV_LIFE_CYCLE	1	1	1
Canonical Pathway	REACTOME_ECM_PROTEOGLYCANS	1	1	1
Canonical Pathway	REACTOME_EFFECTS_OF_PIP2_HYDROLYSIS	1	1	1
Canonical Pathway	REACTOME_EGFR_DOWNREGULATION	1	1	1
Canonical Pathway	REACTOME_EICOSANOID_LIGAND_BINDING_RECEPTORS	1	1	1
Canonical Pathway	REACTOME_EICOSANOIDS	1	1	1
Canonical Pathway	REACTOME_ELASTIC_FIBRE_FORMATION	1	1	1
Canonical Pathway	REACTOME_ELEVATION_OF_CYTOSOLIC_CA2_LEVELS	1	1	1
Canonical Pathway	REACTOME_ENDOGENOUS_STEROLS	1	1	1
Canonical Pathway	REACTOME_ENDOSOMAL_SORTING_COMPLEX_REQUIRED_FOR_TRANSPORT_ESCRT	1	1	1
Canonical Pathway	REACTOME_ENDOSOMAL_VACUOLAR_PATHWAY	1	1	1
Canonical Pathway	REACTOME_ENERGY_DEPENDENT_REGULATION_OF_MTOR_BY_LKB1_AMPK	1	1	1
Canonical Pathway	REACTOME_EPH_EPHRIN_MEDIATED_REPULSION_OF_CELLS	1	1	1
Canonical Pathway	REACTOME_EPH_EPHRIN_SIGNALING	1	1	1
Canonical Pathway	REACTOME_EPHA_MEDIATED_GROWTH_CONE_COLLAPSE	1	1	1
Canonical Pathway	REACTOME_EPHB_MEDIATED_FORWARD_SIGNALING	1	1	1
Canonical Pathway	REACTOME_EPHRIN_SIGNALING	1	1	1
Canonical Pathway	REACTOME_EPIGENETIC_REGULATION_OF_GENE_EXPRESSION	1	1	1
Canonical Pathway	REACTOME_ER_QUALITY_CONTROL_COMPARTMENT_ERQC	1	1	1
Canonical Pathway	REACTOME_ER_TO_GOLGI_ANTEROGRADE_TRANSPORT	1	1	1
Canonical Pathway	REACTOME_ERYTHROPOIETIN_ACTIVATES_RAS	1	1	1
Canonical Pathway	REACTOME_ESR_MEDIATED_SIGNALING	1	1	1
Canonical Pathway	REACTOME_ESTROGEN_DEPENDENT_GENE_EXPRESSION	1	1	1
Canonical Pathway	REACTOME_EUKARYOTIC_TRANSLATION_ELONGATION	1	1	1
Canonical Pathway	REACTOME_EUKARYOTIC_TRANSLATION_INITIATION	1	1	1
Canonical Pathway	REACTOME_EXPORT_OF_VIRAL_RIBONUCLEOPROTEINS_FROM_NUCLEUS	1	1	1
Canonical Pathway	REACTOME_EXTENSION_OF_TELOMERES	1	1	1
Canonical Pathway	REACTOME_EXTRA_NUCLEAR_ESTROGEN_SIGNALING	1	1	1
Canonical Pathway	REACTOME_EXTRACELLULAR_MATRIX_ORGANIZATION	1	1	1
Canonical Pathway	REACTOME_FACTORS_INVOLVED_IN_MEGAKARYOCYTE_DEVELOPMENT_AND_PLATELET_PRODUCTION	1	1	1
Canonical Pathway	REACTOME_FANCONI_ANEMIA_PATHWAY	1	1	1
Canonical Pathway	REACTOME_FATTY_ACID_METABOLISM	1	1	1
Canonical Pathway	REACTOME_FATTY_ACIDS	1	1	1
Canonical Pathway	REACTOME_FATTY_ACYL_COA_BIOSYNTHESIS	1	1	1
Canonical Pathway	REACTOME_FC_EPSILON_RECEPTOR_FCERI_SIGNALING	1	1	1
Canonical Pathway	REACTOME_FCERI_MEDIATED_CA_2_MOBILIZATION	1	1	1
Canonical Pathway	REACTOME_FCERI_MEDIATED_MAPK_ACTIVATION	1	1	1
Canonical Pathway	REACTOME_FCERI_MEDIATED_NF_KB_ACTIVATION	1	1	1
Canonical Pathway	REACTOME_FCGAMMA_RECEPTOR_FCGR_DEPENDENT_PHAGOCYTOSIS	1	1	1
Canonical Pathway	REACTOME_FCGR_ACTIVATION	1	1	1
Canonical Pathway	REACTOME_FCGR3A_MEDIATED_IL10_SYNTHESIS	1	1	1
Canonical Pathway	REACTOME_FERTILIZATION	1	1	1
Canonical Pathway	REACTOME_FGFR1_MUTANT_RECEPTOR_ACTIVATION	1	1	1
Canonical Pathway	REACTOME_FGFR2_ALTERNATIVE_SPLICING	1	1	1
Canonical Pathway	REACTOME_FGFR2_MUTANT_RECEPTOR_ACTIVATION	1	1	1
Canonical Pathway	REACTOME_FLT3_SIGNALING	1	1	1
Canonical Pathway	REACTOME_FLT3_SIGNALING_IN_DISEASE	1	1	1
Canonical Pathway	REACTOME_FOLDING_OF_ACTIN_BY_CCT_TRIC	1	1	1
Canonical Pathway	REACTOME_FORMATION_OF_APOPTOSOME	1	1	1
Canonical Pathway	REACTOME_FORMATION_OF_FIBRIN_CLOT_CLOTTING_CASCADE	1	1	1
Canonical Pathway	REACTOME_FORMATION_OF_INCISION_COMPLEX_IN_GG_NER	1	1	1
Canonical Pathway	REACTOME_FORMATION_OF_RNA_POL_II_ELONGATION_COMPLEX	1	1	1
Canonical Pathway	REACTOME_FORMATION_OF_TC_NER_PRE_INCISION_COMPLEX	1	1	1
Canonical Pathway	REACTOME_FORMATION_OF_THE_BETA_CATENIN_TCF_TRANSACTIVATING_COMPLEX	1	1	1
Canonical Pathway	REACTOME_FORMATION_OF_THE_CORNIFIED_ENVELOPE	1	1	1
Canonical Pathway	REACTOME_FORMATION_OF_THE_EARLY_ELONGATION_COMPLEX	1	1	0.617801
Canonical Pathway	REACTOME_FORMATION_OF_TUBULIN_FOLDING_INTERMEDIATES_BY_CCT_TRIC	1	1	1
Canonical Pathway	REACTOME_FOXO_MEDIATED_TRANSCRIPTION	1	1	1
Canonical Pathway	REACTOME_FOXO_MEDIATED_TRANSCRIPTION_OF_OXIDATIVE_STRESS_METABOLIC_AND_NEURONAL_GENES	1	1	1
Canonical Pathway	REACTOME_FRS_MEDIATED_FGFR1_SIGNALING	1	1	1
Canonical Pathway	REACTOME_FRS_MEDIATED_FGFR2_SIGNALING	1	1	1
Canonical Pathway	REACTOME_FRS_MEDIATED_FGFR4_SIGNALING	1	1	1
Canonical Pathway	REACTOME_G_ALPHA_12_13_SIGNALLING_EVENTS	1	1	1
Canonical Pathway	REACTOME_G_ALPHA_I_SIGNALLING_EVENTS	1	1	1
Canonical Pathway	REACTOME_G_ALPHA_Q_SIGNALLING_EVENTS	1	1	1
Canonical Pathway	REACTOME_G_ALPHA_S_SIGNALLING_EVENTS	1	1	1
Canonical Pathway	REACTOME_G_ALPHA_Z_SIGNALLING_EVENTS	1	1	1
Canonical Pathway	REACTOME_G_BETA_GAMMA_SIGNALLING_THROUGH_CDC42	1	1	1
Canonical Pathway	REACTOME_G_BETA_GAMMA_SIGNALLING_THROUGH_PI3KGAMMA	1	1	1
Canonical Pathway	REACTOME_G_PROTEIN_ACTIVATION	1	1	1
Canonical Pathway	REACTOME_G_PROTEIN_BETA_GAMMA_SIGNALLING	1	1	1
Canonical Pathway	REACTOME_G_PROTEIN_MEDIATED_EVENTS	1	1	1
Canonical Pathway	REACTOME_G0_AND_EARLY_G1	1	1	1
Canonical Pathway	REACTOME_G1_S_DNA_DAMAGE_CHECKPOINTS	1	1	1
Canonical Pathway	REACTOME_G1_S_SPECIFIC_TRANSCRIPTION	1	1	1
Canonical Pathway	REACTOME_G2_M_CHECKPOINTS	1	1	1
Canonical Pathway	REACTOME_G2_M_DNA_DAMAGE_CHECKPOINT	1	1	1
Canonical Pathway	REACTOME_GABA_B_RECEPTOR_ACTIVATION	1	1	1
Canonical Pathway	REACTOME_GABA_RECEPTOR_ACTIVATION	1	1	1
Canonical Pathway	REACTOME_GABA_SYNTHESIS_RELEASE_REUPTAKE_AND_DEGRADATION	1	1	1
Canonical Pathway	REACTOME_GAMMA_CARBOXYLATION_HYPUSINE_FORMATION_AND_ARYLSULFATASE_ACTIVATION	1	1	1
Canonical Pathway	REACTOME_GAMMA_CARBOXYLATION_TRANSPORT_AND_AMINO_TERMINAL_CLEAVAGE_OF_PROTEINS	1	1	1
Canonical Pathway	REACTOME_GAP_FILLING_DNA_REPAIR_SYNTHESIS_AND_LIGATION_IN_GG_NER	1	1	1
Canonical Pathway	REACTOME_GAP_JUNCTION_ASSEMBLY	1	1	1
Canonical Pathway	REACTOME_GAP_JUNCTION_DEGRADATION	1	1	1
Canonical Pathway	REACTOME_GAP_JUNCTION_TRAFFICKING_AND_REGULATION	1	1	1
Canonical Pathway	REACTOME_GENE_AND_PROTEIN_EXPRESSION_BY_JAK_STAT_SIGNALING_AFTER_INTERLEUKIN_12_STIMULATION	1	1	1
Canonical Pathway	REACTOME_GENE_SILENCING_BY_RNA	1	1	1
Canonical Pathway	REACTOME_GENERATION_OF_SECOND_MESSENGER_MOLECULES	1	1	1
Canonical Pathway	REACTOME_GLOBAL_GENOME_NUCLEOTIDE_EXCISION_REPAIR_GG_NER	1	1	1
Canonical Pathway	REACTOME_GLUCAGON_LIKE_PEPTIDE_1_GLP1_REGULATES_INSULIN_SECRETION	1	1	1
Canonical Pathway	REACTOME_GLUCAGON_SIGNALING_IN_METABOLIC_REGULATION	1	1	1
Canonical Pathway	REACTOME_GLUCAGON_TYPE_LIGAND_RECEPTORS	1	1	1
Canonical Pathway	REACTOME_GLUCONEOGENESIS	1	1	1
Canonical Pathway	REACTOME_GLUCOSE_METABOLISM	1	1	1
Canonical Pathway	REACTOME_GLUTAMATE_NEUROTRANSMITTER_RELEASE_CYCLE	1	1	1
Canonical Pathway	REACTOME_GLUTATHIONE_CONJUGATION	1	1	1
Canonical Pathway	REACTOME_GLYCEROPHOSPHOLIPID_BIOSYNTHESIS	1	1	1
Canonical Pathway	REACTOME_GLYCOGEN_BREAKDOWN_GLYCOGENOLYSIS	1	1	1
Canonical Pathway	REACTOME_GLYCOGEN_METABOLISM	1	1	1
Canonical Pathway	REACTOME_GLYCOLYSIS	1	1	1
Canonical Pathway	REACTOME_GLYCOSAMINOGLYCAN_METABOLISM	1	1	1
Canonical Pathway	REACTOME_GLYCOSPHINGOLIPID_METABOLISM	1	1	1
Canonical Pathway	REACTOME_GLYOXYLATE_METABOLISM_AND_GLYCINE_DEGRADATION	1	1	1
Canonical Pathway	REACTOME_GOLGI_ASSOCIATED_VESICLE_BIOGENESIS	1	1	1
Canonical Pathway	REACTOME_GOLGI_TO_ER_RETROGRADE_TRANSPORT	1	1	1
Canonical Pathway	REACTOME_GPCR_LIGAND_BINDING	1	1	1
Canonical Pathway	REACTOME_GPVI_MEDIATED_ACTIVATION_CASCADE	1	1	1
Canonical Pathway	REACTOME_GRB2_EVENTS_IN_ERBB2_SIGNALING	1	1	1
Canonical Pathway	REACTOME_GROWTH_HORMONE_RECEPTOR_SIGNALING	1	1	1
Canonical Pathway	REACTOME_HATS_ACETYLATE_HISTONES	1	1	1
Canonical Pathway	REACTOME_HCMV_EARLY_EVENTS	1	1	1
Canonical Pathway	REACTOME_HCMV_INFECTION	1	1	1
Canonical Pathway	REACTOME_HCMV_LATE_EVENTS	1	1	1
Canonical Pathway	REACTOME_HDACS_DEACETYLATE_HISTONES	1	1	1
Canonical Pathway	REACTOME_HDR_THROUGH_HOMOLOGOUS_RECOMBINATION_HRR	1	1	1
Canonical Pathway	REACTOME_HDR_THROUGH_MMEJ_ALT_NHEJ	1	1	1
Canonical Pathway	REACTOME_HDR_THROUGH_SINGLE_STRAND_ANNEALING_SSA	1	1	1
Canonical Pathway	REACTOME_HEDGEHOG_LIGAND_BIOGENESIS	1	1	1
Canonical Pathway	REACTOME_HEDGEHOG_OFF_STATE	1	1	1
Canonical Pathway	REACTOME_HEDGEHOG_ON_STATE	1	1	1
Canonical Pathway	REACTOME_HEME_BIOSYNTHESIS	1	1	1
Canonical Pathway	REACTOME_HEME_SIGNALING	1	1	1
Canonical Pathway	REACTOME_HEMOSTASIS	1	1	1
Canonical Pathway	REACTOME_HEPARAN_SULFATE_HEPARIN_HS_GAG_METABOLISM	1	1	1
Canonical Pathway	REACTOME_HIGHLY_CALCIUM_PERMEABLE_NICOTINIC_ACETYLCHOLINE_RECEPTORS	1	1	1
Canonical Pathway	REACTOME_HIGHLY_CALCIUM_PERMEABLE_POSTSYNAPTIC_NICOTINIC_ACETYLCHOLINE_RECEPTORS	1	1	1
Canonical Pathway	REACTOME_HIV_ELONGATION_ARREST_AND_RECOVERY	1	1	1
Canonical Pathway	REACTOME_HIV_INFECTION	1	1	1
Canonical Pathway	REACTOME_HIV_LIFE_CYCLE	1	1	1
Canonical Pathway	REACTOME_HIV_TRANSCRIPTION_ELONGATION	1	1	1
Canonical Pathway	REACTOME_HIV_TRANSCRIPTION_INITIATION	1	1	1
Canonical Pathway	REACTOME_HOMOLOGOUS_DNA_PAIRING_AND_STRAND_EXCHANGE	1	1	1
Canonical Pathway	REACTOME_HOMOLOGY_DIRECTED_REPAIR	1	1	1
Canonical Pathway	REACTOME_HOST_INTERACTIONS_OF_HIV_FACTORS	1	1	1
Canonical Pathway	REACTOME_HS_GAG_BIOSYNTHESIS	1	1	1
Canonical Pathway	REACTOME_HS_GAG_DEGRADATION	1	1	1
Canonical Pathway	REACTOME_HSF1_ACTIVATION	1	1	1
Canonical Pathway	REACTOME_HSF1_DEPENDENT_TRANSACTIVATION	1	1	1
Canonical Pathway	REACTOME_HSP90_CHAPERONE_CYCLE_FOR_STEROID_HORMONE_RECEPTORS_SHR	1	1	1
Canonical Pathway	REACTOME_HYALURONAN_METABOLISM	1	1	1
Canonical Pathway	REACTOME_IKK_COMPLEX_RECRUITMENT_MEDIATED_BY_RIP1	1	1	1
Canonical Pathway	REACTOME_IMMUNOREGULATORY_INTERACTIONS_BETWEEN_A_LYMPHOID_AND_A_NON_LYMPHOID_CELL	1	1	1
Canonical Pathway	REACTOME_INFECTION_WITH_MYCOBACTERIUM_TUBERCULOSIS	1	1	1
Canonical Pathway	REACTOME_INFECTIOUS_DISEASE	1	1	1
Canonical Pathway	REACTOME_INFLAMMASOMES	1	1	1
Canonical Pathway	REACTOME_INFLUENZA_INFECTION	1	1	1
Canonical Pathway	REACTOME_INHIBITION_OF_DNA_RECOMBINATION_AT_TELOMERE	1	1	1
Canonical Pathway	REACTOME_INHIBITION_OF_THE_PROTEOLYTIC_ACTIVITY_OF_APC_C_REQUIRED_FOR_THE_ONSET_OF_ANAPHASE_BY_MITOTIC_SPINDLE_CHECKPOINT_COMPONENTS	1	1	1
Canonical Pathway	REACTOME_INITIAL_TRIGGERING_OF_COMPLEMENT	1	1	1
Canonical Pathway	REACTOME_INITIATION_OF_NUCLEAR_ENVELOPE_NE_REFORMATION	1	1	1
Canonical Pathway	REACTOME_INNATE_IMMUNE_SYSTEM	1	1	1
Canonical Pathway	REACTOME_INOSITOL_PHOSPHATE_METABOLISM	1	1	1
Canonical Pathway	REACTOME_INSERTION_OF_TAIL_ANCHORED_PROTEINS_INTO_THE_ENDOPLASMIC_RETICULUM_MEMBRANE	1	1	1
Canonical Pathway	REACTOME_INSULIN_PROCESSING	1	1	1
Canonical Pathway	REACTOME_INSULIN_RECEPTOR_RECYCLING	1	1	1
Canonical Pathway	REACTOME_INSULIN_RECEPTOR_SIGNALLING_CASCADE	1	1	1
Canonical Pathway	REACTOME_INTEGRATION_OF_ENERGY_METABOLISM	1	1	1
Canonical Pathway	REACTOME_INTEGRIN_CELL_SURFACE_INTERACTIONS	1	1	1
Canonical Pathway	REACTOME_INTEGRIN_SIGNALING	1	1	1
Canonical Pathway	REACTOME_INTERACTION_BETWEEN_L1_AND_ANKYRINS	1	1	1
Canonical Pathway	REACTOME_INTERACTIONS_OF_REV_WITH_HOST_CELLULAR_PROTEINS	1	1	1
Canonical Pathway	REACTOME_INTERACTIONS_OF_VPR_WITH_HOST_CELLULAR_PROTEINS	1	1	1
Canonical Pathway	REACTOME_INTERCONVERSION_OF_NUCLEOTIDE_DI_AND_TRIPHOSPHATES	1	1	1
Canonical Pathway	REACTOME_INTERFERON_ALPHA_BETA_SIGNALING	1	1	1
Canonical Pathway	REACTOME_INTERFERON_GAMMA_SIGNALING	1	1	1
Canonical Pathway	REACTOME_INTERFERON_SIGNALING	1	1	1
Canonical Pathway	REACTOME_INTERLEUKIN_1_FAMILY_SIGNALING	1	1	1
Canonical Pathway	REACTOME_INTERLEUKIN_1_SIGNALING	1	1	1
Canonical Pathway	REACTOME_INTERLEUKIN_10_SIGNALING	1	1	1
Canonical Pathway	REACTOME_INTERLEUKIN_12_FAMILY_SIGNALING	1	1	1
Canonical Pathway	REACTOME_INTERLEUKIN_12_SIGNALING	1	1	1
Canonical Pathway	REACTOME_INTERLEUKIN_15_SIGNALING	1	1	1
Canonical Pathway	REACTOME_INTERLEUKIN_17_SIGNALING	1	1	1
Canonical Pathway	REACTOME_INTERLEUKIN_2_FAMILY_SIGNALING	1	1	1
Canonical Pathway	REACTOME_INTERLEUKIN_20_FAMILY_SIGNALING	1	1	1
Canonical Pathway	REACTOME_INTERLEUKIN_27_SIGNALING	1	1	1
Canonical Pathway	REACTOME_INTERLEUKIN_3_INTERLEUKIN_5_AND_GM_CSF_SIGNALING	1	1	1
Canonical Pathway	REACTOME_INTERLEUKIN_37_SIGNALING	1	1	1
Canonical Pathway	REACTOME_INTERLEUKIN_4_AND_INTERLEUKIN_13_SIGNALING	1	1	1
Canonical Pathway	REACTOME_INTERLEUKIN_6_FAMILY_SIGNALING	1	1	1
Canonical Pathway	REACTOME_INTERLEUKIN_7_SIGNALING	1	1	1
Canonical Pathway	REACTOME_INTERLEUKIN_RECEPTOR_SHC_SIGNALING	1	1	1
Canonical Pathway	REACTOME_INTRA_GOLGI_AND_RETROGRADE_GOLGI_TO_ER_TRAFFIC	1	1	1
Canonical Pathway	REACTOME_INTRA_GOLGI_TRAFFIC	1	1	1
Canonical Pathway	REACTOME_INTRACELLULAR_SIGNALING_BY_SECOND_MESSENGERS	1	1	1
Canonical Pathway	REACTOME_INTRAFLAGELLAR_TRANSPORT	1	1	1
Canonical Pathway	REACTOME_INTRINSIC_PATHWAY_FOR_APOPTOSIS	1	0.815292	1
Canonical Pathway	REACTOME_INTRINSIC_PATHWAY_OF_FIBRIN_CLOT_FORMATION	1	1	1
Canonical Pathway	REACTOME_INWARDLY_RECTIFYING_K_CHANNELS	1	1	1
Canonical Pathway	REACTOME_ION_CHANNEL_TRANSPORT	1	1	1
Canonical Pathway	REACTOME_ION_HOMEOSTASIS	1	1	1
Canonical Pathway	REACTOME_ION_TRANSPORT_BY_P_TYPE_ATPASES	1	1	1
Canonical Pathway	REACTOME_IRE1ALPHA_ACTIVATES_CHAPERONES	1	1	1
Canonical Pathway	REACTOME_IRON_UPTAKE_AND_TRANSPORT	1	1	1
Canonical Pathway	REACTOME_IRS_MEDIATED_SIGNALLING	1	1	1
Canonical Pathway	REACTOME_KERATAN_SULFATE_KERATIN_METABOLISM	1	1	1
Canonical Pathway	REACTOME_KERATINIZATION	1	1	1
Canonical Pathway	REACTOME_KETONE_BODY_METABOLISM	1	1	1
Canonical Pathway	REACTOME_KINESINS	1	1	1
Canonical Pathway	REACTOME_KSRP_KHSRP_BINDS_AND_DESTABILIZES_MRNA	1	1	1
Canonical Pathway	REACTOME_L1CAM_INTERACTIONS	1	1	1
Canonical Pathway	REACTOME_LAGGING_STRAND_SYNTHESIS	1	1	1
Canonical Pathway	REACTOME_LAMININ_INTERACTIONS	1	1	1
Canonical Pathway	REACTOME_LATE_ENDOSOMAL_MICROAUTOPHAGY	1	1	1
Canonical Pathway	REACTOME_LDL_CLEARANCE	1	1	1
Canonical Pathway	REACTOME_LEISHMANIA_INFECTION	1	1	1
Canonical Pathway	REACTOME_LISTERIA_MONOCYTOGENES_ENTRY_INTO_HOST_CELLS	1	1	1
Canonical Pathway	REACTOME_LONG_TERM_POTENTIATION	1	1	1
Canonical Pathway	REACTOME_LYSINE_CATABOLISM	1	1	1
Canonical Pathway	REACTOME_LYSOSOME_VESICLE_BIOGENESIS	1	1	1
Canonical Pathway	REACTOME_M_PHASE	1	1	1
Canonical Pathway	REACTOME_MAP2K_AND_MAPK_ACTIVATION	1	1	1
Canonical Pathway	REACTOME_MAPK_FAMILY_SIGNALING_CASCADES	1	1	1
Canonical Pathway	REACTOME_MAPK_TARGETS_NUCLEAR_EVENTS_MEDIATED_BY_MAP_KINASES	1	1	1
Canonical Pathway	REACTOME_MAPK6_MAPK4_SIGNALING	1	1	1
Canonical Pathway	REACTOME_MASTL_FACILITATES_MITOTIC_PROGRESSION	1	1	1
Canonical Pathway	REACTOME_MATURATION_OF_SARS_COV_1_SPIKE_PROTEIN	1	1	1
Canonical Pathway	REACTOME_MATURATION_OF_SARS_COV_2_SPIKE_PROTEIN	1	1	1
Canonical Pathway	REACTOME_MECP2_REGULATES_NEURONAL_RECEPTORS_AND_CHANNELS	1	1	1
Canonical Pathway	REACTOME_MEIOSIS	1	1	1
Canonical Pathway	REACTOME_MEIOTIC_RECOMBINATION	1	1	1
Canonical Pathway	REACTOME_MEIOTIC_SYNAPSIS	1	1	1
Canonical Pathway	REACTOME_MEMBRANE_TRAFFICKING	1	1	1
Canonical Pathway	REACTOME_MET_ACTIVATES_PTK2_SIGNALING	1	1	1
Canonical Pathway	REACTOME_MET_ACTIVATES_RAP1_AND_RAC1	1	1	1
Canonical Pathway	REACTOME_MET_ACTIVATES_RAS_SIGNALING	1	1	1
Canonical Pathway	REACTOME_MET_PROMOTES_CELL_MOTILITY	1	1	1
Canonical Pathway	REACTOME_METABOLIC_DISORDERS_OF_BIOLOGICAL_OXIDATION_ENZYMES	1	1	1
Canonical Pathway	REACTOME_METABOLISM_OF_AMINO_ACIDS_AND_DERIVATIVES	1	1	1
Canonical Pathway	REACTOME_METABOLISM_OF_CARBOHYDRATES	1	1	1
Canonical Pathway	REACTOME_METABOLISM_OF_COFACTORS	1	1	1
Canonical Pathway	REACTOME_METABOLISM_OF_FAT_SOLUBLE_VITAMINS	1	1	1
Canonical Pathway	REACTOME_METABOLISM_OF_FOLATE_AND_PTERINES	1	1	1
Canonical Pathway	REACTOME_METABOLISM_OF_LIPIDS	1	1	1
Canonical Pathway	REACTOME_METABOLISM_OF_NITRIC_OXIDE_NOS3_ACTIVATION_AND_REGULATION	1	1	1
Canonical Pathway	REACTOME_METABOLISM_OF_NUCLEOTIDES	1	1	1
Canonical Pathway	REACTOME_METABOLISM_OF_POLYAMINES	1	1	1
Canonical Pathway	REACTOME_METABOLISM_OF_PORPHYRINS	1	1	1
Canonical Pathway	REACTOME_METABOLISM_OF_RNA	1	1	1
Canonical Pathway	REACTOME_METABOLISM_OF_STEROID_HORMONES	1	1	1
Canonical Pathway	REACTOME_METABOLISM_OF_STEROIDS	1	1	1
Canonical Pathway	REACTOME_METABOLISM_OF_VITAMINS_AND_COFACTORS	1	1	1
Canonical Pathway	REACTOME_METABOLISM_OF_WATER_SOLUBLE_VITAMINS_AND_COFACTORS	1	1	1
Canonical Pathway	REACTOME_METAL_ION_SLC_TRANSPORTERS	1	1	1
Canonical Pathway	REACTOME_METHIONINE_SALVAGE_PATHWAY	1	1	1
Canonical Pathway	REACTOME_METHYLATION	1	1	1
Canonical Pathway	REACTOME_MHC_CLASS_II_ANTIGEN_PRESENTATION	1	1	1
Canonical Pathway	REACTOME_MICRORNA_MIRNA_BIOGENESIS	1	1	1
Canonical Pathway	REACTOME_MIRO_GTPASE_CYCLE	1	1	1
Canonical Pathway	REACTOME_MISCELLANEOUS_SUBSTRATES	1	1	1
Canonical Pathway	REACTOME_MISCELLANEOUS_TRANSPORT_AND_BINDING_EVENTS	1	1	1
Canonical Pathway	REACTOME_MISMATCH_REPAIR	1	1	1
Canonical Pathway	REACTOME_MITOCHONDRIAL_BIOGENESIS	1	1	1
Canonical Pathway	REACTOME_MITOCHONDRIAL_CALCIUM_ION_TRANSPORT	1	1	1
Canonical Pathway	REACTOME_MITOCHONDRIAL_FATTY_ACID_BETA_OXIDATION	1	1	1
Canonical Pathway	REACTOME_MITOCHONDRIAL_PROTEIN_IMPORT	1	1	1
Canonical Pathway	REACTOME_MITOCHONDRIAL_TRANSLATION	1	1	1
Canonical Pathway	REACTOME_MITOCHONDRIAL_TRNA_AMINOACYLATION	1	1	1
Canonical Pathway	REACTOME_MITOPHAGY	1	1	1
Canonical Pathway	REACTOME_MITOTIC_G1_PHASE_AND_G1_S_TRANSITION	1	1	1
Canonical Pathway	REACTOME_MITOTIC_G2_G2_M_PHASES	1	1	1
Canonical Pathway	REACTOME_MITOTIC_METAPHASE_AND_ANAPHASE	1	1	1
Canonical Pathway	REACTOME_MITOTIC_PROMETAPHASE	1	1	1
Canonical Pathway	REACTOME_MITOTIC_PROPHASE	1	1	1
Canonical Pathway	REACTOME_MITOTIC_SPINDLE_CHECKPOINT	1	1	1
Canonical Pathway	REACTOME_MOLECULES_ASSOCIATED_WITH_ELASTIC_FIBRES	1	1	1
Canonical Pathway	REACTOME_MRNA_CAPPING	1	1	1
Canonical Pathway	REACTOME_MRNA_DECAY_BY_3_TO_5_EXORIBONUCLEASE	1	1	1
Canonical Pathway	REACTOME_MRNA_SPLICING	1	1	1
Canonical Pathway	REACTOME_MRNA_SPLICING_MINOR_PATHWAY	1	1	1
Canonical Pathway	REACTOME_MTOR_SIGNALLING	1	1	1
Canonical Pathway	REACTOME_MTORC1_MEDIATED_SIGNALLING	1	1	1
Canonical Pathway	REACTOME_MUSCLE_CONTRACTION	1	1	1
Canonical Pathway	REACTOME_MYD88_INDEPENDENT_TLR4_CASCADE	1	1	1
Canonical Pathway	REACTOME_MYOGENESIS	1	1	1
Canonical Pathway	REACTOME_N_GLYCAN_ANTENNAE_ELONGATION_IN_THE_MEDIAL_TRANS_GOLGI	1	1	1
Canonical Pathway	REACTOME_N_GLYCAN_TRIMMING_IN_THE_ER_AND_CALNEXIN_CALRETICULIN_CYCLE	1	1	1
Canonical Pathway	REACTOME_NCAM_SIGNALING_FOR_NEURITE_OUT_GROWTH	1	1	1
Canonical Pathway	REACTOME_NCAM1_INTERACTIONS	1	1	1
Canonical Pathway	REACTOME_NEDDYLATION	1	1	1
Canonical Pathway	REACTOME_NEF_MEDIATES_DOWN_MODULATION_OF_CELL_SURFACE_RECEPTORS_BY_RECRUITING_THEM_TO_CLATHRIN_ADAPTERS	1	1	1
Canonical Pathway	REACTOME_NEGATIVE_EPIGENETIC_REGULATION_OF_RRNA_EXPRESSION	1	1	1
Canonical Pathway	REACTOME_NEGATIVE_REGULATION_OF_FGFR1_SIGNALING	1	1	1
Canonical Pathway	REACTOME_NEGATIVE_REGULATION_OF_FGFR2_SIGNALING	1	1	1
Canonical Pathway	REACTOME_NEGATIVE_REGULATION_OF_FGFR3_SIGNALING	1	1	1
Canonical Pathway	REACTOME_NEGATIVE_REGULATION_OF_FGFR4_SIGNALING	1	1	1
Canonical Pathway	REACTOME_NEGATIVE_REGULATION_OF_FLT3	1	1	1
Canonical Pathway	REACTOME_NEGATIVE_REGULATION_OF_MAPK_PATHWAY	1	1	1
Canonical Pathway	REACTOME_NEGATIVE_REGULATION_OF_MET_ACTIVITY	1	1	1
Canonical Pathway	REACTOME_NEGATIVE_REGULATION_OF_NMDA_RECEPTOR_MEDIATED_NEURONAL_TRANSMISSION	1	1	1
Canonical Pathway	REACTOME_NEGATIVE_REGULATION_OF_NOTCH4_SIGNALING	1	1	1
Canonical Pathway	REACTOME_NEGATIVE_REGULATION_OF_THE_PI3K_AKT_NETWORK	1	1	1
Canonical Pathway	REACTOME_NEGATIVE_REGULATORS_OF_DDX58_IFIH1_SIGNALING	1	1	1
Canonical Pathway	REACTOME_NEPHRIN_FAMILY_INTERACTIONS	1	1	1
Canonical Pathway	REACTOME_NERVOUS_SYSTEM_DEVELOPMENT	1	1	1
Canonical Pathway	REACTOME_NETRIN_1_SIGNALING	1	1	1
Canonical Pathway	REACTOME_NEUREXINS_AND_NEUROLIGINS	1	1	1
Canonical Pathway	REACTOME_NEURONAL_SYSTEM	1	1	1
Canonical Pathway	REACTOME_NEUROTRANSMITTER_RECEPTORS_AND_POSTSYNAPTIC_SIGNAL_TRANSMISSION	1	1	1
Canonical Pathway	REACTOME_NEUROTRANSMITTER_RELEASE_CYCLE	1	1	1
Canonical Pathway	REACTOME_NEUTROPHIL_DEGRANULATION	1	1	1
Canonical Pathway	REACTOME_NF_KB_ACTIVATION_THROUGH_FADD_RIP_1_PATHWAY_MEDIATED_BY_CASPASE_8_AND_10	1	1	1
Canonical Pathway	REACTOME_NGF_STIMULATED_TRANSCRIPTION	1	1	1
Canonical Pathway	REACTOME_NICOTINATE_METABOLISM	1	1	1
Canonical Pathway	REACTOME_NITRIC_OXIDE_STIMULATES_GUANYLATE_CYCLASE	1	1	1
Canonical Pathway	REACTOME_NOD1_2_SIGNALING_PATHWAY	1	1	1
Canonical Pathway	REACTOME_NON_INTEGRIN_MEMBRANE_ECM_INTERACTIONS	1	1	1
Canonical Pathway	REACTOME_NONHOMOLOGOUS_END_JOINING_NHEJ	1	1	1
Canonical Pathway	REACTOME_NONSENSE_MEDIATED_DECAY_NMD	1	1	1
Canonical Pathway	REACTOME_NOREPINEPHRINE_NEUROTRANSMITTER_RELEASE_CYCLE	1	1	1
Canonical Pathway	REACTOME_NOTCH_HLH_TRANSCRIPTION_PATHWAY	1	1	1
Canonical Pathway	REACTOME_NOTCH1_INTRACELLULAR_DOMAIN_REGULATES_TRANSCRIPTION	1	1	1
Canonical Pathway	REACTOME_NOTCH2_ACTIVATION_AND_TRANSMISSION_OF_SIGNAL_TO_THE_NUCLEUS	1	1	1
Canonical Pathway	REACTOME_NOTCH3_ACTIVATION_AND_TRANSMISSION_OF_SIGNAL_TO_THE_NUCLEUS	1	1	1
Canonical Pathway	REACTOME_NR1H2_AND_NR1H3_MEDIATED_SIGNALING	1	1	1
Canonical Pathway	REACTOME_NR1H3_NR1H2_REGULATE_GENE_EXPRESSION_LINKED_TO_CHOLESTEROL_TRANSPORT_AND_EFFLUX	1	1	1
Canonical Pathway	REACTOME_NRAGE_SIGNALS_DEATH_THROUGH_JNK	1	1	1
Canonical Pathway	REACTOME_NS1_MEDIATED_EFFECTS_ON_HOST_PATHWAYS	1	1	1
Canonical Pathway	REACTOME_NUCLEAR_ENVELOPE_BREAKDOWN	1	1	1
Canonical Pathway	REACTOME_NUCLEAR_ENVELOPE_NE_REASSEMBLY	1	1	1
Canonical Pathway	REACTOME_NUCLEAR_EVENTS_KINASE_AND_TRANSCRIPTION_FACTOR_ACTIVATION	1	1	1
Canonical Pathway	REACTOME_NUCLEAR_IMPORT_OF_REV_PROTEIN	1	1	1
Canonical Pathway	REACTOME_NUCLEAR_PORE_COMPLEX_NPC_DISASSEMBLY	1	1	1
Canonical Pathway	REACTOME_NUCLEAR_RECEPTOR_TRANSCRIPTION_PATHWAY	1	1	1
Canonical Pathway	REACTOME_NUCLEAR_SIGNALING_BY_ERBB4	1	1	1
Canonical Pathway	REACTOME_NUCLEOBASE_CATABOLISM	1	1	1
Canonical Pathway	REACTOME_NUCLEOTIDE_BINDING_DOMAIN_LEUCINE_RICH_REPEAT_CONTAINING_RECEPTOR_NLR_SIGNALING_PATHWAYS	1	1	1
Canonical Pathway	REACTOME_NUCLEOTIDE_EXCISION_REPAIR	1	1	1
Canonical Pathway	REACTOME_NUCLEOTIDE_SALVAGE	1	1	1
Canonical Pathway	REACTOME_O_GLYCOSYLATION_OF_TSR_DOMAIN_CONTAINING_PROTEINS	1	1	1
Canonical Pathway	REACTOME_O_LINKED_GLYCOSYLATION	1	1	1
Canonical Pathway	REACTOME_O_LINKED_GLYCOSYLATION_OF_MUCINS	1	1	1
Canonical Pathway	REACTOME_OLFACTORY_SIGNALING_PATHWAY	1	1	1
Canonical Pathway	REACTOME_ONCOGENE_INDUCED_SENESCENCE	1	1	1
Canonical Pathway	REACTOME_ONCOGENIC_MAPK_SIGNALING	1	1	1
Canonical Pathway	REACTOME_OPIOID_SIGNALLING	1	1	1
Canonical Pathway	REACTOME_ORC1_REMOVAL_FROM_CHROMATIN	1	1	1
Canonical Pathway	REACTOME_ORGANELLE_BIOGENESIS_AND_MAINTENANCE	1	1	1
Canonical Pathway	REACTOME_OTHER_INTERLEUKIN_SIGNALING	1	1	1
Canonical Pathway	REACTOME_OTHER_SEMAPHORIN_INTERACTIONS	1	1	1
Canonical Pathway	REACTOME_OVARIAN_TUMOR_DOMAIN_PROTEASES	1	1	1
Canonical Pathway	REACTOME_OXIDATIVE_STRESS_INDUCED_SENESCENCE	1	1	1
Canonical Pathway	REACTOME_P75_NTR_RECEPTOR_MEDIATED_SIGNALLING	1	1	1
Canonical Pathway	REACTOME_PARASITE_INFECTION	1	1	1
Canonical Pathway	REACTOME_PASSIVE_TRANSPORT_BY_AQUAPORINS	1	1	1
Canonical Pathway	REACTOME_PCNA_DEPENDENT_LONG_PATCH_BASE_EXCISION_REPAIR	1	1	1
Canonical Pathway	REACTOME_PCP_CE_PATHWAY	1	1	1
Canonical Pathway	REACTOME_PD_1_SIGNALING	1	1	1
Canonical Pathway	REACTOME_PENTOSE_PHOSPHATE_PATHWAY	1	1	1
Canonical Pathway	REACTOME_PEPTIDE_HORMONE_METABOLISM	1	1	1
Canonical Pathway	REACTOME_PEPTIDE_LIGAND_BINDING_RECEPTORS	1	1	1
Canonical Pathway	REACTOME_PERK_REGULATES_GENE_EXPRESSION	1	1	1
Canonical Pathway	REACTOME_PEROXISOMAL_LIPID_METABOLISM	1	1	1
Canonical Pathway	REACTOME_PEROXISOMAL_PROTEIN_IMPORT	1	1	1
Canonical Pathway	REACTOME_PHASE_0_RAPID_DEPOLARISATION	1	1	1
Canonical Pathway	REACTOME_PHASE_I_FUNCTIONALIZATION_OF_COMPOUNDS	1	1	1
Canonical Pathway	REACTOME_PHASE_II_CONJUGATION_OF_COMPOUNDS	1	1	1
Canonical Pathway	REACTOME_PHENYLALANINE_AND_TYROSINE_METABOLISM	1	1	1
Canonical Pathway	REACTOME_PHOSPHATE_BOND_HYDROLYSIS_BY_NTPDASE_PROTEINS	1	1	1
Canonical Pathway	REACTOME_PHOSPHATE_BOND_HYDROLYSIS_BY_NUDT_PROTEINS	1	1	1
Canonical Pathway	REACTOME_PHOSPHOLIPID_METABOLISM	1	1	1
Canonical Pathway	REACTOME_PHOSPHORYLATION_OF_THE_APC_C	1	1	1
Canonical Pathway	REACTOME_PI_METABOLISM	1	1	1
Canonical Pathway	REACTOME_PI3K_AKT_SIGNALING_IN_CANCER	1	1	1
Canonical Pathway	REACTOME_PINK1_PRKN_MEDIATED_MITOPHAGY	1	1	1
Canonical Pathway	REACTOME_PIWI_INTERACTING_RNA_PIRNA_BIOGENESIS	1	1	1
Canonical Pathway	REACTOME_PKMTS_METHYLATE_HISTONE_LYSINES	1	1	1
Canonical Pathway	REACTOME_PLASMA_LIPOPROTEIN_ASSEMBLY_REMODELING_AND_CLEARANCE	1	1	1
Canonical Pathway	REACTOME_PLASMA_LIPOPROTEIN_CLEARANCE	1	1	1
Canonical Pathway	REACTOME_PLASMA_LIPOPROTEIN_REMODELING	1	1	1
Canonical Pathway	REACTOME_PLATELET_ACTIVATION_SIGNALING_AND_AGGREGATION	1	1	1
Canonical Pathway	REACTOME_PLATELET_ADHESION_TO_EXPOSED_COLLAGEN	1	1	1
Canonical Pathway	REACTOME_PLATELET_AGGREGATION_PLUG_FORMATION	1	1	1
Canonical Pathway	REACTOME_PLATELET_CALCIUM_HOMEOSTASIS	1	1	1
Canonical Pathway	REACTOME_PLATELET_HOMEOSTASIS	1	1	1
Canonical Pathway	REACTOME_POLYMERASE_SWITCHING_ON_THE_C_STRAND_OF_THE_TELOMERE	1	1	1
Canonical Pathway	REACTOME_POSITIVE_EPIGENETIC_REGULATION_OF_RRNA_EXPRESSION	1	1	1
Canonical Pathway	REACTOME_POST_CHAPERONIN_TUBULIN_FOLDING_PATHWAY	1	1	1
Canonical Pathway	REACTOME_POST_TRANSLATIONAL_MODIFICATION_SYNTHESIS_OF_GPI_ANCHORED_PROTEINS	1	1	1
Canonical Pathway	REACTOME_POST_TRANSLATIONAL_PROTEIN_MODIFICATION	1	1	1
Canonical Pathway	REACTOME_POSTMITOTIC_NUCLEAR_PORE_COMPLEX_NPC_REFORMATION	1	1	1
Canonical Pathway	REACTOME_POTASSIUM_CHANNELS	1	1	1
Canonical Pathway	REACTOME_POTENTIAL_THERAPEUTICS_FOR_SARS	1	1	1
Canonical Pathway	REACTOME_PRE_NOTCH_EXPRESSION_AND_PROCESSING	1	1	1
Canonical Pathway	REACTOME_PROCESSING_OF_CAPPED_INTRON_CONTAINING_PRE_MRNA	1	1	1
Canonical Pathway	REACTOME_PROCESSING_OF_CAPPED_INTRONLESS_PRE_MRNA	1	1	1
Canonical Pathway	REACTOME_PROCESSING_OF_DNA_DOUBLE_STRAND_BREAK_ENDS	1	1	1
Canonical Pathway	REACTOME_PROCESSING_OF_INTRONLESS_PRE_MRNAS	1	1	1
Canonical Pathway	REACTOME_PROCESSIVE_SYNTHESIS_ON_THE_C_STRAND_OF_THE_TELOMERE	1	1	1
Canonical Pathway	REACTOME_PROCESSIVE_SYNTHESIS_ON_THE_LAGGING_STRAND	1	1	1
Canonical Pathway	REACTOME_PROGRAMMED_CELL_DEATH	1	1	1
Canonical Pathway	REACTOME_PROLONGED_ERK_ACTIVATION_EVENTS	1	1	1
Canonical Pathway	REACTOME_PROSTACYCLIN_SIGNALLING_THROUGH_PROSTACYCLIN_RECEPTOR	1	1	1
Canonical Pathway	REACTOME_PROTEIN_FOLDING	1	1	1
Canonical Pathway	REACTOME_PROTEIN_LOCALIZATION	1	1	1
Canonical Pathway	REACTOME_PROTEIN_METHYLATION	1	1	1
Canonical Pathway	REACTOME_PROTEIN_PROTEIN_INTERACTIONS_AT_SYNAPSES	1	1	1
Canonical Pathway	REACTOME_PROTEIN_UBIQUITINATION	1	1	1
Canonical Pathway	REACTOME_PTEN_REGULATION	1	1	1
Canonical Pathway	REACTOME_PTK6_REGULATES_RHO_GTPASES_RAS_GTPASE_AND_MAP_KINASES	1	1	1
Canonical Pathway	REACTOME_PTK6_REGULATES_RTKS_AND_THEIR_EFFECTORS_AKT1_AND_DOK1	1	1	1
Canonical Pathway	REACTOME_PURINE_CATABOLISM	1	1	1
Canonical Pathway	REACTOME_PURINERGIC_SIGNALING_IN_LEISHMANIASIS_INFECTION	1	1	1
Canonical Pathway	REACTOME_PYRIMIDINE_CATABOLISM	1	1	1
Canonical Pathway	REACTOME_PYROPTOSIS	1	1	1
Canonical Pathway	REACTOME_PYRUVATE_METABOLISM	1	1	1
Canonical Pathway	REACTOME_PYRUVATE_METABOLISM_AND_CITRIC_ACID_TCA_CYCLE	1	1	1
Canonical Pathway	REACTOME_RA_BIOSYNTHESIS_PATHWAY	1	1	1
Canonical Pathway	REACTOME_RAB_GEFS_EXCHANGE_GTP_FOR_GDP_ON_RABS	1	1	1
Canonical Pathway	REACTOME_RAB_GERANYLGERANYLATION	1	1	1
Canonical Pathway	REACTOME_RAB_REGULATION_OF_TRAFFICKING	1	1	1
Canonical Pathway	REACTOME_RAC1_GTPASE_CYCLE	1	1	1
Canonical Pathway	REACTOME_RAC2_GTPASE_CYCLE	1	1	1
Canonical Pathway	REACTOME_RAC3_GTPASE_CYCLE	1	1	1
Canonical Pathway	REACTOME_RAF_ACTIVATION	1	1	1
Canonical Pathway	REACTOME_RAF_INDEPENDENT_MAPK1_3_ACTIVATION	1	1	1
Canonical Pathway	REACTOME_RAS_ACTIVATION_UPON_CA2_INFLUX_THROUGH_NMDA_RECEPTOR	1	1	1
Canonical Pathway	REACTOME_RAS_PROCESSING	1	1	1
Canonical Pathway	REACTOME_RECOGNITION_OF_DNA_DAMAGE_BY_PCNA_CONTAINING_REPLICATION_COMPLEX	1	1	1
Canonical Pathway	REACTOME_RECRUITMENT_OF_MITOTIC_CENTROSOME_PROTEINS_AND_COMPLEXES	1	1	1
Canonical Pathway	REACTOME_RECRUITMENT_OF_NUMA_TO_MITOTIC_CENTROSOMES	1	1	1
Canonical Pathway	REACTOME_RECYCLING_OF_BILE_ACIDS_AND_SALTS	1	1	1
Canonical Pathway	REACTOME_RECYCLING_PATHWAY_OF_L1	1	1	1
Canonical Pathway	REACTOME_REGULATED_NECROSIS	1	1	1
Canonical Pathway	REACTOME_REGULATION_OF_CHOLESTEROL_BIOSYNTHESIS_BY_SREBP_SREBF	1	1	1
Canonical Pathway	REACTOME_REGULATION_OF_CYTOSKELETAL_REMODELING_AND_CELL_SPREADING_BY_IPP_COMPLEX_COMPONENTS	1	1	1
Canonical Pathway	REACTOME_REGULATION_OF_EXPRESSION_OF_SLITS_AND_ROBOS	1	1	1
Canonical Pathway	REACTOME_REGULATION_OF_FZD_BY_UBIQUITINATION	1	1	1
Canonical Pathway	REACTOME_REGULATION_OF_GLUCOKINASE_BY_GLUCOKINASE_REGULATORY_PROTEIN	1	1	1
Canonical Pathway	REACTOME_REGULATION_OF_HMOX1_EXPRESSION_AND_ACTIVITY	1	1	1
Canonical Pathway	REACTOME_REGULATION_OF_HSF1_MEDIATED_HEAT_SHOCK_RESPONSE	1	1	1
Canonical Pathway	REACTOME_REGULATION_OF_INNATE_IMMUNE_RESPONSES_TO_CYTOSOLIC_DNA	1	1	1
Canonical Pathway	REACTOME_REGULATION_OF_INSULIN_LIKE_GROWTH_FACTOR_IGF_TRANSPORT_AND_UPTAKE_BY_INSULIN_LIKE_GROWTH_FACTOR_BINDING_PROTEINS_IGFBPS	1	1	1
Canonical Pathway	REACTOME_REGULATION_OF_INSULIN_SECRETION	1	1	1
Canonical Pathway	REACTOME_REGULATION_OF_LIPID_METABOLISM_BY_PPARALPHA	1	1	1
Canonical Pathway	REACTOME_REGULATION_OF_MECP2_EXPRESSION_AND_ACTIVITY	1	1	1
Canonical Pathway	REACTOME_REGULATION_OF_MRNA_STABILITY_BY_PROTEINS_THAT_BIND_AU_RICH_ELEMENTS	1	1	1
Canonical Pathway	REACTOME_REGULATION_OF_PLK1_ACTIVITY_AT_G2_M_TRANSITION	1	1	1
Canonical Pathway	REACTOME_REGULATION_OF_PTEN_GENE_TRANSCRIPTION	1	1	1
Canonical Pathway	REACTOME_REGULATION_OF_PTEN_STABILITY_AND_ACTIVITY	1	1	1
Canonical Pathway	REACTOME_REGULATION_OF_PYRUVATE_DEHYDROGENASE_PDH_COMPLEX	1	1	1
Canonical Pathway	REACTOME_REGULATION_OF_RAS_BY_GAPS	1	1	1
Canonical Pathway	REACTOME_REGULATION_OF_RUNX2_EXPRESSION_AND_ACTIVITY	1	1	1
Canonical Pathway	REACTOME_REGULATION_OF_RUNX3_EXPRESSION_AND_ACTIVITY	1	1	1
Canonical Pathway	REACTOME_REGULATION_OF_SIGNALING_BY_CBL	1	1	1
Canonical Pathway	REACTOME_REGULATION_OF_SIGNALING_BY_NODAL	1	1	1
Canonical Pathway	REACTOME_REGULATION_OF_TLR_BY_ENDOGENOUS_LIGAND	1	1	1
Canonical Pathway	REACTOME_REGULATION_OF_TNFR1_SIGNALING	1	1	1
Canonical Pathway	REACTOME_REGULATION_OF_TP53_ACTIVITY	1	1	1
Canonical Pathway	REACTOME_REGULATION_OF_TP53_ACTIVITY_THROUGH_ACETYLATION	1	1	1
Canonical Pathway	REACTOME_REGULATION_OF_TP53_ACTIVITY_THROUGH_PHOSPHORYLATION	1	1	1
Canonical Pathway	REACTOME_REGULATION_OF_TP53_EXPRESSION_AND_DEGRADATION	1	1	1
Canonical Pathway	REACTOME_RELEASE_OF_HH_NP_FROM_THE_SECRETING_CELL	1	1	1
Canonical Pathway	REACTOME_REPRODUCTION	1	1	1
Canonical Pathway	REACTOME_RESOLUTION_OF_ABASIC_SITES_AP_SITES	1	1	1
Canonical Pathway	REACTOME_RESOLUTION_OF_AP_SITES_VIA_THE_MULTIPLE_NUCLEOTIDE_PATCH_REPLACEMENT_PATHWAY	1	1	1
Canonical Pathway	REACTOME_RESOLUTION_OF_D_LOOP_STRUCTURES	1	1	1
Canonical Pathway	REACTOME_RESOLUTION_OF_D_LOOP_STRUCTURES_THROUGH_SYNTHESIS_DEPENDENT_STRAND_ANNEALING_SDSA	1	1	1
Canonical Pathway	REACTOME_RESOLUTION_OF_SISTER_CHROMATID_COHESION	1	1	1
Canonical Pathway	REACTOME_RESPIRATORY_ELECTRON_TRANSPORT	1	1	1
Canonical Pathway	REACTOME_RESPIRATORY_ELECTRON_TRANSPORT_ATP_SYNTHESIS_BY_CHEMIOSMOTIC_COUPLING_AND_HEAT_PRODUCTION_BY_UNCOUPLING_PROTEINS	1	1	1
Canonical Pathway	REACTOME_RESPONSE_OF_EIF2AK4_GCN2_TO_AMINO_ACID_DEFICIENCY	1	1	1
Canonical Pathway	REACTOME_RESPONSE_OF_MTB_TO_PHAGOCYTOSIS	1	1	1
Canonical Pathway	REACTOME_RESPONSE_TO_ELEVATED_PLATELET_CYTOSOLIC_CA2	1	1	1
Canonical Pathway	REACTOME_RET_SIGNALING	1	1	1
Canonical Pathway	REACTOME_RETINOID_CYCLE_DISEASE_EVENTS	1	1	1
Canonical Pathway	REACTOME_RETROGRADE_TRANSPORT_AT_THE_TRANS_GOLGI_NETWORK	1	1	1
Canonical Pathway	REACTOME_REVERSIBLE_HYDRATION_OF_CARBON_DIOXIDE	1	1	1
Canonical Pathway	REACTOME_RHO_GTPASE_CYCLE	1	1	1
Canonical Pathway	REACTOME_RHO_GTPASE_EFFECTORS	1	1	1
Canonical Pathway	REACTOME_RHO_GTPASES_ACTIVATE_FORMINS	1	1	1
Canonical Pathway	REACTOME_RHO_GTPASES_ACTIVATE_IQGAPS	1	1	1
Canonical Pathway	REACTOME_RHO_GTPASES_ACTIVATE_NADPH_OXIDASES	1	1	1
Canonical Pathway	REACTOME_RHO_GTPASES_ACTIVATE_PKNS	1	1	1
Canonical Pathway	REACTOME_RHO_GTPASES_ACTIVATE_WASPS_AND_WAVES	1	1	1
Canonical Pathway	REACTOME_RHOA_GTPASE_CYCLE	1	1	1
Canonical Pathway	REACTOME_RHOB_GTPASE_CYCLE	1	1	1
Canonical Pathway	REACTOME_RHOBTB_GTPASE_CYCLE	1	1	1
Canonical Pathway	REACTOME_RHOBTB1_GTPASE_CYCLE	1	1	1
Canonical Pathway	REACTOME_RHOBTB2_GTPASE_CYCLE	1	1	1
Canonical Pathway	REACTOME_RHOC_GTPASE_CYCLE	1	1	1
Canonical Pathway	REACTOME_RHOD_GTPASE_CYCLE	1	1	1
Canonical Pathway	REACTOME_RHOF_GTPASE_CYCLE	1	1	1
Canonical Pathway	REACTOME_RHOG_GTPASE_CYCLE	1	1	1
Canonical Pathway	REACTOME_RHOH_GTPASE_CYCLE	1	1	1
Canonical Pathway	REACTOME_RHOJ_GTPASE_CYCLE	1	1	1
Canonical Pathway	REACTOME_RHOQ_GTPASE_CYCLE	1	1	1
Canonical Pathway	REACTOME_RHOU_GTPASE_CYCLE	1	1	1
Canonical Pathway	REACTOME_RHOV_GTPASE_CYCLE	1	1	1
Canonical Pathway	REACTOME_RIPK1_MEDIATED_REGULATED_NECROSIS	1	1	1
Canonical Pathway	REACTOME_RMTS_METHYLATE_HISTONE_ARGININES	1	1	1
Canonical Pathway	REACTOME_RNA_POLYMERASE_I_PROMOTER_ESCAPE	1	1	1
Canonical Pathway	REACTOME_RNA_POLYMERASE_I_TRANSCRIPTION	1	1	1
Canonical Pathway	REACTOME_RNA_POLYMERASE_I_TRANSCRIPTION_INITIATION	1	1	1
Canonical Pathway	REACTOME_RNA_POLYMERASE_I_TRANSCRIPTION_TERMINATION	1	1	1
Canonical Pathway	REACTOME_RNA_POLYMERASE_II_TRANSCRIBES_SNRNA_GENES	1	1	1
Canonical Pathway	REACTOME_RNA_POLYMERASE_II_TRANSCRIPTION	1	1	1
Canonical Pathway	REACTOME_RNA_POLYMERASE_II_TRANSCRIPTION_TERMINATION	1	1	1
Canonical Pathway	REACTOME_RNA_POLYMERASE_III_CHAIN_ELONGATION	1	1	1
Canonical Pathway	REACTOME_RNA_POLYMERASE_III_TRANSCRIPTION	1	1	1
Canonical Pathway	REACTOME_RNA_POLYMERASE_III_TRANSCRIPTION_INITIATION_FROM_TYPE_1_PROMOTER	1	1	1
Canonical Pathway	REACTOME_RNA_POLYMERASE_III_TRANSCRIPTION_INITIATION_FROM_TYPE_3_PROMOTER	1	1	1
Canonical Pathway	REACTOME_RNA_POLYMERASE_III_TRANSCRIPTION_TERMINATION	1	1	1
Canonical Pathway	REACTOME_RND1_GTPASE_CYCLE	1	1	1
Canonical Pathway	REACTOME_RND2_GTPASE_CYCLE	1	1	1
Canonical Pathway	REACTOME_RND3_GTPASE_CYCLE	1	1	1
Canonical Pathway	REACTOME_ROLE_OF_PHOSPHOLIPIDS_IN_PHAGOCYTOSIS	1	1	1
Canonical Pathway	REACTOME_ROS_AND_RNS_PRODUCTION_IN_PHAGOCYTES	1	1	1
Canonical Pathway	REACTOME_RRNA_MODIFICATION_IN_THE_NUCLEUS_AND_CYTOSOL	1	1	1
Canonical Pathway	REACTOME_RRNA_PROCESSING	1	1	1
Canonical Pathway	REACTOME_RUNX1_INTERACTS_WITH_CO_FACTORS_WHOSE_PRECISE_EFFECT_ON_RUNX1_TARGETS_IS_NOT_KNOWN	1	1	1
Canonical Pathway	REACTOME_RUNX1_REGULATES_TRANSCRIPTION_OF_GENES_INVOLVED_IN_DIFFERENTIATION_OF_HSCS	1	1	1
Canonical Pathway	REACTOME_S_PHASE	1	1	1
Canonical Pathway	REACTOME_SARS_COV_1_INFECTION	1	1	1
Canonical Pathway	REACTOME_SARS_COV_2_INFECTION	1	1	1
Canonical Pathway	REACTOME_SARS_COV_INFECTIONS	1	1	1
Canonical Pathway	REACTOME_SCAVENGING_BY_CLASS_A_RECEPTORS	1	1	1
Canonical Pathway	REACTOME_SCF_SKP2_MEDIATED_DEGRADATION_OF_P27_P21	1	1	1
Canonical Pathway	REACTOME_SEALING_OF_THE_NUCLEAR_ENVELOPE_NE_BY_ESCRT_III	1	1	1
Canonical Pathway	REACTOME_SELECTIVE_AUTOPHAGY	1	1	1
Canonical Pathway	REACTOME_SELENOAMINO_ACID_METABOLISM	1	1	1
Canonical Pathway	REACTOME_SEMA4D_IN_SEMAPHORIN_SIGNALING	1	1	1
Canonical Pathway	REACTOME_SEMAPHORIN_INTERACTIONS	1	1	1
Canonical Pathway	REACTOME_SENESCENCE_ASSOCIATED_SECRETORY_PHENOTYPE_SASP	1	1	1
Canonical Pathway	REACTOME_SENSORY_PERCEPTION	1	1	1
Canonical Pathway	REACTOME_SENSORY_PROCESSING_OF_SOUND	1	1	1
Canonical Pathway	REACTOME_SENSORY_PROCESSING_OF_SOUND_BY_OUTER_HAIR_CELLS_OF_THE_COCHLEA	1	1	1
Canonical Pathway	REACTOME_SEPARATION_OF_SISTER_CHROMATIDS	1	1	1
Canonical Pathway	REACTOME_SEROTONIN_NEUROTRANSMITTER_RELEASE_CYCLE	1	1	1
Canonical Pathway	REACTOME_SHC_MEDIATED_CASCADE_FGFR1	1	1	1
Canonical Pathway	REACTOME_SHC_MEDIATED_CASCADE_FGFR4	1	1	1
Canonical Pathway	REACTOME_SHC1_EVENTS_IN_ERBB2_SIGNALING	1	1	1
Canonical Pathway	REACTOME_SHC1_EVENTS_IN_ERBB4_SIGNALING	1	1	1
Canonical Pathway	REACTOME_SIALIC_ACID_METABOLISM	1	1	1
Canonical Pathway	REACTOME_SIGNAL_AMPLIFICATION	1	1	1
Canonical Pathway	REACTOME_SIGNAL_REGULATORY_PROTEIN_FAMILY_INTERACTIONS	1	1	1
Canonical Pathway	REACTOME_SIGNAL_TRANSDUCTION_BY_L1	1	1	1
Canonical Pathway	REACTOME_SIGNALING_BY_BMP	1	1	1
Canonical Pathway	REACTOME_SIGNALING_BY_BRAF_AND_RAF_FUSIONS	1	1	1
Canonical Pathway	REACTOME_SIGNALING_BY_CSF3_G_CSF	1	1	1
Canonical Pathway	REACTOME_SIGNALING_BY_EGFR	1	1	1
Canonical Pathway	REACTOME_SIGNALING_BY_ERBB2	1	1	1
Canonical Pathway	REACTOME_SIGNALING_BY_ERBB2_IN_CANCER	1	1	1
Canonical Pathway	REACTOME_SIGNALING_BY_ERBB4	1	1	1
Canonical Pathway	REACTOME_SIGNALING_BY_ERYTHROPOIETIN	1	1	1
Canonical Pathway	REACTOME_SIGNALING_BY_FGFR	1	1	1
Canonical Pathway	REACTOME_SIGNALING_BY_FGFR_IN_DISEASE	1	1	1
Canonical Pathway	REACTOME_SIGNALING_BY_FGFR1	1	1	1
Canonical Pathway	REACTOME_SIGNALING_BY_FGFR1_IN_DISEASE	1	1	1
Canonical Pathway	REACTOME_SIGNALING_BY_FGFR2	1	1	1
Canonical Pathway	REACTOME_SIGNALING_BY_FGFR2_IIIA_TM	1	1	1
Canonical Pathway	REACTOME_SIGNALING_BY_FGFR2_IN_DISEASE	1	1	1
Canonical Pathway	REACTOME_SIGNALING_BY_FGFR3	1	1	1
Canonical Pathway	REACTOME_SIGNALING_BY_FGFR4	1	1	1
Canonical Pathway	REACTOME_SIGNALING_BY_FLT3_FUSION_PROTEINS	1	1	1
Canonical Pathway	REACTOME_SIGNALING_BY_FLT3_ITD_AND_TKD_MUTANTS	1	1	1
Canonical Pathway	REACTOME_SIGNALING_BY_GPCR	1	1	1
Canonical Pathway	REACTOME_SIGNALING_BY_HEDGEHOG	1	1	1
Canonical Pathway	REACTOME_SIGNALING_BY_HIPPO	1	1	1
Canonical Pathway	REACTOME_SIGNALING_BY_INSULIN_RECEPTOR	1	1	1
Canonical Pathway	REACTOME_SIGNALING_BY_INTERLEUKINS	1	1	1
Canonical Pathway	REACTOME_SIGNALING_BY_KIT_IN_DISEASE	1	1	1
Canonical Pathway	REACTOME_SIGNALING_BY_MET	1	1	1
Canonical Pathway	REACTOME_SIGNALING_BY_MODERATE_KINASE_ACTIVITY_BRAF_MUTANTS	1	1	1
Canonical Pathway	REACTOME_SIGNALING_BY_NODAL	1	1	1
Canonical Pathway	REACTOME_SIGNALING_BY_NOTCH	1	1	1
Canonical Pathway	REACTOME_SIGNALING_BY_NOTCH1	1	1	1
Canonical Pathway	REACTOME_SIGNALING_BY_NOTCH1_PEST_DOMAIN_MUTANTS_IN_CANCER	1	1	1
Canonical Pathway	REACTOME_SIGNALING_BY_NOTCH2	1	1	1
Canonical Pathway	REACTOME_SIGNALING_BY_NOTCH3	1	1	1
Canonical Pathway	REACTOME_SIGNALING_BY_NOTCH4	1	1	1
Canonical Pathway	REACTOME_SIGNALING_BY_NTRK2_TRKB	1	1	1
Canonical Pathway	REACTOME_SIGNALING_BY_NTRKS	1	1	1
Canonical Pathway	REACTOME_SIGNALING_BY_NUCLEAR_RECEPTORS	1	1	1
Canonical Pathway	REACTOME_SIGNALING_BY_PDGF	1	1	1
Canonical Pathway	REACTOME_SIGNALING_BY_PDGFR_IN_DISEASE	1	1	1
Canonical Pathway	REACTOME_SIGNALING_BY_PTK6	1	1	1
Canonical Pathway	REACTOME_SIGNALING_BY_RECEPTOR_TYROSINE_KINASES	1	1	1
Canonical Pathway	REACTOME_SIGNALING_BY_RETINOIC_ACID	1	1	1
Canonical Pathway	REACTOME_SIGNALING_BY_RHO_GTPASES_MIRO_GTPASES_AND_RHOBTB3	1	1	1
Canonical Pathway	REACTOME_SIGNALING_BY_ROBO_RECEPTORS	1	1	1
Canonical Pathway	REACTOME_SIGNALING_BY_SCF_KIT	1	1	1
Canonical Pathway	REACTOME_SIGNALING_BY_TGF_BETA_RECEPTOR_COMPLEX	1	1	1
Canonical Pathway	REACTOME_SIGNALING_BY_TGFB_FAMILY_MEMBERS	1	1	1
Canonical Pathway	REACTOME_SIGNALING_BY_THE_B_CELL_RECEPTOR_BCR	1	1	1
Canonical Pathway	REACTOME_SIGNALING_BY_TYPE_1_INSULIN_LIKE_GROWTH_FACTOR_1_RECEPTOR_IGF1R	1	1	1
Canonical Pathway	REACTOME_SIGNALING_BY_VEGF	1	1	1
Canonical Pathway	REACTOME_SIGNALING_BY_WNT	1	1	1
Canonical Pathway	REACTOME_SIGNALING_BY_WNT_IN_CANCER	1	1	1
Canonical Pathway	REACTOME_SIGNALLING_TO_ERKS	1	1	1
Canonical Pathway	REACTOME_SIGNALLING_TO_RAS	1	1	1
Canonical Pathway	REACTOME_SLC_MEDIATED_TRANSMEMBRANE_TRANSPORT	1	1	1
Canonical Pathway	REACTOME_SLC_TRANSPORTER_DISORDERS	1	1	1
Canonical Pathway	REACTOME_SMOOTH_MUSCLE_CONTRACTION	1	1	1
Canonical Pathway	REACTOME_SNRNP_ASSEMBLY	1	1	1
Canonical Pathway	REACTOME_SPHINGOLIPID_DE_NOVO_BIOSYNTHESIS	1	1	1
Canonical Pathway	REACTOME_SPHINGOLIPID_METABOLISM	1	1	1
Canonical Pathway	REACTOME_SPRY_REGULATION_OF_FGF_SIGNALING	1	1	1
Canonical Pathway	REACTOME_SRP_DEPENDENT_COTRANSLATIONAL_PROTEIN_TARGETING_TO_MEMBRANE	1	1	1
Canonical Pathway	REACTOME_STABILIZATION_OF_P53	1	1	1
Canonical Pathway	REACTOME_STIMULI_SENSING_CHANNELS	1	1	1
Canonical Pathway	REACTOME_STRIATED_MUSCLE_CONTRACTION	1	1	1
Canonical Pathway	REACTOME_SULFUR_AMINO_ACID_METABOLISM	1	1	1
Canonical Pathway	REACTOME_SUMOYLATION	1	1	1
Canonical Pathway	REACTOME_SUMOYLATION_OF_CHROMATIN_ORGANIZATION_PROTEINS	1	1	1
Canonical Pathway	REACTOME_SUMOYLATION_OF_DNA_DAMAGE_RESPONSE_AND_REPAIR_PROTEINS	1	1	1
Canonical Pathway	REACTOME_SUMOYLATION_OF_DNA_REPLICATION_PROTEINS	1	1	1
Canonical Pathway	REACTOME_SUMOYLATION_OF_RNA_BINDING_PROTEINS	1	1	1
Canonical Pathway	REACTOME_SUMOYLATION_OF_SUMOYLATION_PROTEINS	1	1	1
Canonical Pathway	REACTOME_SUMOYLATION_OF_TRANSCRIPTION_COFACTORS	1	1	1
Canonical Pathway	REACTOME_SUMOYLATION_OF_UBIQUITINYLATION_PROTEINS	1	1	1
Canonical Pathway	REACTOME_SUPPRESSION_OF_PHAGOSOMAL_MATURATION	1	1	1
Canonical Pathway	REACTOME_SURFACTANT_METABOLISM	1	1	1
Canonical Pathway	REACTOME_SWITCHING_OF_ORIGINS_TO_A_POST_REPLICATIVE_STATE	1	1	1
Canonical Pathway	REACTOME_SYNAPTIC_ADHESION_LIKE_MOLECULES	1	1	1
Canonical Pathway	REACTOME_SYNDECAN_INTERACTIONS	1	1	1
Canonical Pathway	REACTOME_SYNTHESIS_OF_15_EICOSATETRAENOIC_ACID_DERIVATIVES	1	1	1
Canonical Pathway	REACTOME_SYNTHESIS_OF_ACTIVE_UBIQUITIN_ROLES_OF_E1_AND_E2_ENZYMES	1	1	1
Canonical Pathway	REACTOME_SYNTHESIS_OF_BILE_ACIDS_AND_BILE_SALTS	1	1	1
Canonical Pathway	REACTOME_SYNTHESIS_OF_BILE_ACIDS_AND_BILE_SALTS_VIA_24_HYDROXYCHOLESTEROL	1	1	1
Canonical Pathway	REACTOME_SYNTHESIS_OF_BILE_ACIDS_AND_BILE_SALTS_VIA_27_HYDROXYCHOLESTEROL	1	1	1
Canonical Pathway	REACTOME_SYNTHESIS_OF_BILE_ACIDS_AND_BILE_SALTS_VIA_7ALPHA_HYDROXYCHOLESTEROL	1	1	1
Canonical Pathway	REACTOME_SYNTHESIS_OF_GLYCOSYLPHOSPHATIDYLINOSITOL_GPI	1	1	1
Canonical Pathway	REACTOME_SYNTHESIS_OF_IP2_IP_AND_INS_IN_THE_CYTOSOL	1	1	1
Canonical Pathway	REACTOME_SYNTHESIS_OF_IP3_AND_IP4_IN_THE_CYTOSOL	1	1	1
Canonical Pathway	REACTOME_SYNTHESIS_OF_KETONE_BODIES	1	1	1
Canonical Pathway	REACTOME_SYNTHESIS_OF_LEUKOTRIENES_LT_AND_EOXINS_EX	1	1	1
Canonical Pathway	REACTOME_SYNTHESIS_OF_PA	1	1	1
Canonical Pathway	REACTOME_SYNTHESIS_OF_PC	1	1	1
Canonical Pathway	REACTOME_SYNTHESIS_OF_PE	1	1	1
Canonical Pathway	REACTOME_SYNTHESIS_OF_PIPS_AT_THE_EARLY_ENDOSOME_MEMBRANE	1	1	1
Canonical Pathway	REACTOME_SYNTHESIS_OF_PIPS_AT_THE_GOLGI_MEMBRANE	1	1	1
Canonical Pathway	REACTOME_SYNTHESIS_OF_PIPS_AT_THE_PLASMA_MEMBRANE	1	1	1
Canonical Pathway	REACTOME_SYNTHESIS_OF_SUBSTRATES_IN_N_GLYCAN_BIOSYTHESIS	1	1	1
Canonical Pathway	REACTOME_SYNTHESIS_OF_VERY_LONG_CHAIN_FATTY_ACYL_COAS	1	1	1
Canonical Pathway	REACTOME_SYNTHESIS_OF_WYBUTOSINE_AT_G37_OF_TRNA_PHE	1	1	1
Canonical Pathway	REACTOME_TAK1_ACTIVATES_NFKB_BY_PHOSPHORYLATION_AND_ACTIVATION_OF_IKKS_COMPLEX	1	1	1
Canonical Pathway	REACTOME_TBC_RABGAPS	1	1	1
Canonical Pathway	REACTOME_TCF_DEPENDENT_SIGNALING_IN_RESPONSE_TO_WNT	1	1	1
Canonical Pathway	REACTOME_TCR_SIGNALING	1	1	1
Canonical Pathway	REACTOME_TELOMERE_C_STRAND_LAGGING_STRAND_SYNTHESIS	1	1	1
Canonical Pathway	REACTOME_TELOMERE_MAINTENANCE	1	1	1
Canonical Pathway	REACTOME_TERMINATION_OF_O_GLYCAN_BIOSYNTHESIS	1	1	1
Canonical Pathway	REACTOME_TERMINATION_OF_TRANSLESION_DNA_SYNTHESIS	1	1	1
Canonical Pathway	REACTOME_TGF_BETA_RECEPTOR_SIGNALING_ACTIVATES_SMADS	1	1	1
Canonical Pathway	REACTOME_THE_ACTIVATION_OF_ARYLSULFATASES	1	1	1
Canonical Pathway	REACTOME_THE_CANONICAL_RETINOID_CYCLE_IN_RODS_TWILIGHT_VISION	1	1	1
Canonical Pathway	REACTOME_THE_CITRIC_ACID_TCA_CYCLE_AND_RESPIRATORY_ELECTRON_TRANSPORT	1	1	1
Canonical Pathway	REACTOME_THE_NLRP3_INFLAMMASOME	1	1	1
Canonical Pathway	REACTOME_THE_PHOTOTRANSDUCTION_CASCADE	1	1	1
Canonical Pathway	REACTOME_THE_ROLE_OF_GTSE1_IN_G2_M_PROGRESSION_AFTER_G2_CHECKPOINT	1	1	1
Canonical Pathway	REACTOME_THE_ROLE_OF_NEF_IN_HIV_1_REPLICATION_AND_DISEASE_PATHOGENESIS	1	1	1
Canonical Pathway	REACTOME_THROMBIN_SIGNALLING_THROUGH_PROTEINASE_ACTIVATED_RECEPTORS_PARS	1	1	1
Canonical Pathway	REACTOME_THROMBOXANE_SIGNALLING_THROUGH_TP_RECEPTOR	1	1	1
Canonical Pathway	REACTOME_TIE2_SIGNALING	1	1	1
Canonical Pathway	REACTOME_TIGHT_JUNCTION_INTERACTIONS	1	1	1
Canonical Pathway	REACTOME_TNF_RECEPTOR_SUPERFAMILY_TNFSF_MEMBERS_MEDIATING_NON_CANONICAL_NF_KB_PATHWAY	1	1	1
Canonical Pathway	REACTOME_TNF_SIGNALING	1	1	1
Canonical Pathway	REACTOME_TNFR1_INDUCED_NFKAPPAB_SIGNALING_PATHWAY	1	1	1
Canonical Pathway	REACTOME_TNFR2_NON_CANONICAL_NF_KB_PATHWAY	1	1	1
Canonical Pathway	REACTOME_TNFS_BIND_THEIR_PHYSIOLOGICAL_RECEPTORS	1	1	1
Canonical Pathway	REACTOME_TOLL_LIKE_RECEPTOR_9_TLR9_CASCADE	1	1	1
Canonical Pathway	REACTOME_TOLL_LIKE_RECEPTOR_CASCADES	1	1	1
Canonical Pathway	REACTOME_TOLL_LIKE_RECEPTOR_TLR1_TLR2_CASCADE	1	1	1
Canonical Pathway	REACTOME_TP53_REGULATES_METABOLIC_GENES	1	1	1
Canonical Pathway	REACTOME_TP53_REGULATES_TRANSCRIPTION_OF_ADDITIONAL_CELL_CYCLE_GENES_WHOSE_EXACT_ROLE_IN_THE_P53_PATHWAY_REMAIN_UNCERTAIN	1	1	1
Canonical Pathway	REACTOME_TP53_REGULATES_TRANSCRIPTION_OF_CELL_CYCLE_GENES	1	1	1
Canonical Pathway	REACTOME_TP53_REGULATES_TRANSCRIPTION_OF_CELL_DEATH_GENES	1	1	1
Canonical Pathway	REACTOME_TP53_REGULATES_TRANSCRIPTION_OF_DNA_REPAIR_GENES	1	1	1
Canonical Pathway	REACTOME_TP53_REGULATES_TRANSCRIPTION_OF_GENES_INVOLVED_IN_CYTOCHROME_C_RELEASE	1	1	1
Canonical Pathway	REACTOME_TRAF3_DEPENDENT_IRF_ACTIVATION_PATHWAY	1	1	1
Canonical Pathway	REACTOME_TRAF6_MEDIATED_INDUCTION_OF_TAK1_COMPLEX_WITHIN_TLR4_COMPLEX	1	1	1
Canonical Pathway	REACTOME_TRAF6_MEDIATED_IRF7_ACTIVATION	1	1	1
Canonical Pathway	REACTOME_TRAFFICKING_AND_PROCESSING_OF_ENDOSOMAL_TLR	1	1	1
Canonical Pathway	REACTOME_TRAFFICKING_OF_AMPA_RECEPTORS	1	1	1
Canonical Pathway	REACTOME_TRAFFICKING_OF_GLUR2_CONTAINING_AMPA_RECEPTORS	1	1	1
Canonical Pathway	REACTOME_TRANS_GOLGI_NETWORK_VESICLE_BUDDING	1	1	1
Canonical Pathway	REACTOME_TRANSCRIPTION_COUPLED_NUCLEOTIDE_EXCISION_REPAIR_TC_NER	1	1	1
Canonical Pathway	REACTOME_TRANSCRIPTION_OF_THE_HIV_GENOME	1	1	1
Canonical Pathway	REACTOME_TRANSCRIPTIONAL_ACTIVATION_OF_MITOCHONDRIAL_BIOGENESIS	1	1	1
Canonical Pathway	REACTOME_TRANSCRIPTIONAL_ACTIVITY_OF_SMAD2_SMAD3_SMAD4_HETEROTRIMER	1	1	1
Canonical Pathway	REACTOME_TRANSCRIPTIONAL_REGULATION_BY_E2F6	1	1	1
Canonical Pathway	REACTOME_TRANSCRIPTIONAL_REGULATION_BY_MECP2	1	1	1
Canonical Pathway	REACTOME_TRANSCRIPTIONAL_REGULATION_BY_RUNX1	1	1	1
Canonical Pathway	REACTOME_TRANSCRIPTIONAL_REGULATION_BY_RUNX2	1	1	1
Canonical Pathway	REACTOME_TRANSCRIPTIONAL_REGULATION_BY_RUNX3	1	1	1
Canonical Pathway	REACTOME_TRANSCRIPTIONAL_REGULATION_BY_SMALL_RNAS	1	1	1
Canonical Pathway	REACTOME_TRANSCRIPTIONAL_REGULATION_BY_TP53	1	1	1
Canonical Pathway	REACTOME_TRANSCRIPTIONAL_REGULATION_BY_VENTX	1	1	1
Canonical Pathway	REACTOME_TRANSCRIPTIONAL_REGULATION_OF_GRANULOPOIESIS	1	1	1
Canonical Pathway	REACTOME_TRANSCRIPTIONAL_REGULATION_OF_WHITE_ADIPOCYTE_DIFFERENTIATION	1	1	1
Canonical Pathway	REACTOME_TRANSFERRIN_ENDOCYTOSIS_AND_RECYCLING	1	1	1
Canonical Pathway	REACTOME_TRANSLATION	1	1	1
Canonical Pathway	REACTOME_TRANSLATION_OF_REPLICASE_AND_ASSEMBLY_OF_THE_REPLICATION_TRANSCRIPTION_COMPLEX	1	1	1
Canonical Pathway	REACTOME_TRANSLATION_OF_SARS_COV_1_STRUCTURAL_PROTEINS	1	1	1
Canonical Pathway	REACTOME_TRANSLATION_OF_SARS_COV_2_STRUCTURAL_PROTEINS	1	1	1
Canonical Pathway	REACTOME_TRANSLESION_SYNTHESIS_BY_POLH	1	1	1
Canonical Pathway	REACTOME_TRANSLESION_SYNTHESIS_BY_POLK	1	1	1
Canonical Pathway	REACTOME_TRANSLESION_SYNTHESIS_BY_Y_FAMILY_DNA_POLYMERASES_BYPASSES_LESIONS_ON_DNA_TEMPLATE	1	1	1
Canonical Pathway	REACTOME_TRANSLOCATION_OF_SLC2A4_GLUT4_TO_THE_PLASMA_MEMBRANE	1	1	1
Canonical Pathway	REACTOME_TRANSMISSION_ACROSS_CHEMICAL_SYNAPSES	1	1	1
Canonical Pathway	REACTOME_TRANSPORT_OF_BILE_SALTS_AND_ORGANIC_ACIDS_METAL_IONS_AND_AMINE_COMPOUNDS	1	1	1
Canonical Pathway	REACTOME_TRANSPORT_OF_CONNEXONS_TO_THE_PLASMA_MEMBRANE	1	1	1
Canonical Pathway	REACTOME_TRANSPORT_OF_FATTY_ACIDS	1	1	1
Canonical Pathway	REACTOME_TRANSPORT_OF_INORGANIC_CATIONS_ANIONS_AND_AMINO_ACIDS_OLIGOPEPTIDES	1	1	1
Canonical Pathway	REACTOME_TRANSPORT_OF_MATURE_MRNAS_DERIVED_FROM_INTRONLESS_TRANSCRIPTS	1	1	1
Canonical Pathway	REACTOME_TRANSPORT_OF_MATURE_TRANSCRIPT_TO_CYTOPLASM	1	1	1
Canonical Pathway	REACTOME_TRANSPORT_OF_SMALL_MOLECULES	1	1	1
Canonical Pathway	REACTOME_TRANSPORT_OF_THE_SLBP_DEPENDANT_MATURE_MRNA	1	1	1
Canonical Pathway	REACTOME_TRANSPORT_OF_VITAMINS_NUCLEOSIDES_AND_RELATED_MOLECULES	1	1	1
Canonical Pathway	REACTOME_TRANSPORT_TO_THE_GOLGI_AND_SUBSEQUENT_MODIFICATION	1	1	1
Canonical Pathway	REACTOME_TRIF_MEDIATED_PROGRAMMED_CELL_DEATH	1	1	1
Canonical Pathway	REACTOME_TRIGLYCERIDE_METABOLISM	1	1	1
Canonical Pathway	REACTOME_TRISTETRAPROLIN_TTP_ZFP36_BINDS_AND_DESTABILIZES_MRNA	1	1	1
Canonical Pathway	REACTOME_TRNA_AMINOACYLATION	1	1	1
Canonical Pathway	REACTOME_TRNA_MODIFICATION_IN_THE_MITOCHONDRION	1	1	1
Canonical Pathway	REACTOME_TRNA_MODIFICATION_IN_THE_NUCLEUS_AND_CYTOSOL	1	1	1
Canonical Pathway	REACTOME_TRNA_PROCESSING	1	1	1
Canonical Pathway	REACTOME_TRNA_PROCESSING_IN_THE_NUCLEUS	1	1	1
Canonical Pathway	REACTOME_TRP_CHANNELS	1	1	1
Canonical Pathway	REACTOME_TYPE_I_HEMIDESMOSOME_ASSEMBLY	1	1	1
Canonical Pathway	REACTOME_UB_SPECIFIC_PROCESSING_PROTEASES	1	1	1
Canonical Pathway	REACTOME_UCH_PROTEINASES	1	1	1
Canonical Pathway	REACTOME_UNBLOCKING_OF_NMDA_RECEPTORS_GLUTAMATE_BINDING_AND_ACTIVATION	1	1	1
Canonical Pathway	REACTOME_UNFOLDED_PROTEIN_RESPONSE_UPR	1	1	1
Canonical Pathway	REACTOME_UPTAKE_AND_ACTIONS_OF_BACTERIAL_TOXINS	1	1	1
Canonical Pathway	REACTOME_VASOPRESSIN_REGULATES_RENAL_WATER_HOMEOSTASIS_VIA_AQUAPORINS	1	1	1
Canonical Pathway	REACTOME_VEGFR2_MEDIATED_CELL_PROLIFERATION	1	1	1
Canonical Pathway	REACTOME_VEGFR2_MEDIATED_VASCULAR_PERMEABILITY	1	1	1
Canonical Pathway	REACTOME_VESICLE_MEDIATED_TRANSPORT	1	1	1
Canonical Pathway	REACTOME_VIRAL_MESSENGER_RNA_SYNTHESIS	1	1	1
Canonical Pathway	REACTOME_VISUAL_PHOTOTRANSDUCTION	1	1	1
Canonical Pathway	REACTOME_VITAMIN_B5_PANTOTHENATE_METABOLISM	1	1	1
Canonical Pathway	REACTOME_VLDLR_INTERNALISATION_AND_DEGRADATION	1	1	1
Canonical Pathway	REACTOME_VOLTAGE_GATED_POTASSIUM_CHANNELS	1	1	1
Canonical Pathway	REACTOME_VXPX_CARGO_TARGETING_TO_CILIUM	1	1	1
Canonical Pathway	REACTOME_WNT_LIGAND_BIOGENESIS_AND_TRAFFICKING	1	1	1
Canonical Pathway	REACTOME_XENOBIOTICS	1	1	1
Canonical Pathway	REACTOME_ZBP1_DAI_MEDIATED_INDUCTION_OF_TYPE_I_IFNS	1	1	1
Canonical Pathway	REACTOME_ZINC_INFLUX_INTO_CELLS_BY_THE_SLC39_GENE_FAMILY	1	1	1
Canonical Pathway	REACTOME_ZINC_TRANSPORTERS	1	1	1
GO Term	BP_acid_secretion	1	1	1
GO Term	BP_actin_cytoskeleton_reorganization	1	1	1
GO Term	BP_actin_filament_based_movement	1	1	1
GO Term	BP_actin_filament_organization	1	1	1
GO Term	BP_activation_of_adenylate_cyclase_activity	1	1	1
GO Term	BP_activation_of_protein_kinase_activity	1	1	1
GO Term	BP_actomyosin_structure_organization	1	1	1
GO Term	BP_acute_inflammatory_response	1	1	1
GO Term	BP_adaptive_immune_response	1	1	1
GO Term	BP_adaptive_thermogenesis	1	1	1
GO Term	BP_adrenergic_receptor_signaling_pathway	1	1	1
GO Term	BP_adult_behavior	1	1	1
GO Term	BP_aging	1	1	1
GO Term	BP_ameboidal_type_cell_migration	1	1	1
GO Term	BP_amine_metabolic_process	1	1	1
GO Term	BP_amine_transport	1	1	1
GO Term	BP_amino_sugar_metabolic_process	1	1	1
GO Term	BP_aminoglycan_metabolic_process	1	1	1
GO Term	BP_ammonium_ion_metabolic_process	1	1	1
GO Term	BP_ammonium_transport	1	1	1
GO Term	BP_amyloid_beta_clearance	1	1	1
GO Term	BP_amyloid_beta_metabolic_process	1	1	1
GO Term	BP_amyloid_precursor_protein_metabolic_process	1	1	1
GO Term	BP_anatomical_structure_homeostasis	1	1	1
GO Term	BP_angiogenesis	1	1	1
GO Term	BP_animal_organ_formation	1	1	1
GO Term	BP_anion_homeostasis	1	1	1
GO Term	BP_anion_transmembrane_transport	1	1	1
GO Term	BP_anoikis	1	1	1
GO Term	BP_antibiotic_metabolic_process	1	1	1
GO Term	BP_antigen_processing_and_presentation	1	1	1
GO Term	BP_apoptotic_mitochondrial_changes	1	1	1
GO Term	BP_apoptotic_process_involved_in_development	1	1	1
GO Term	BP_appendage_development	1	1	1
GO Term	BP_artery_development	1	1	1
GO Term	BP_autonomic_nervous_system_development	1	1	1
GO Term	BP_axon_development	1	1	1
GO Term	BP_azole_transmembrane_transport	1	1	1
GO Term	BP_B_cell_activation	1	1	1
GO Term	BP_base_excision_repair	1	1	1
GO Term	BP_behavioral_defense_response	1	1	1
GO Term	BP_benzene_containing_compound_metabolic_process	1	1	1
GO Term	BP_beta_catenin_TCF_complex_assembly	1	1	1
GO Term	BP_biomineral_tissue_development	1	1	1
GO Term	BP_body_morphogenesis	1	1	1
GO Term	BP_bone_development	1	1	1
GO Term	BP_brain_morphogenesis	1	1	1
GO Term	BP_calcium_ion_regulated_exocytosis	1	1	1
GO Term	BP_carbohydrate_biosynthetic_process	1	1	1
GO Term	BP_carbohydrate_catabolic_process	1	1	1
GO Term	BP_carbohydrate_derivative_catabolic_process	1	1	1
GO Term	BP_carbohydrate_derivative_transport	1	1	1
GO Term	BP_carbohydrate_homeostasis	1	1	1
GO Term	BP_carbohydrate_transport	1	1	1
GO Term	BP_cardiac_chamber_development	1	1	1
GO Term	BP_cardiocyte_differentiation	1	1	1
GO Term	BP_cation_transmembrane_transport	1	1	1
GO Term	BP_cell_adhesion_mediated_by_integrin	1	1	1
GO Term	BP_cell_cell_adhesion_mediated_by_cadherin	1	1	1
GO Term	BP_cell_cell_adhesion_via_plasma_membrane_adhesion_molecules	1	1	1
GO Term	BP_cell_cell_fusion	1	1	1
GO Term	BP_cell_cell_signaling_by_wnt	1	1	1
GO Term	BP_cell_chemotaxis	1	1	1
GO Term	BP_cell_communication_by_electrical_coupling	1	1	1
GO Term	BP_cell_cycle_arrest	1	1	1
GO Term	BP_cell_cycle_checkpoint	1	1	1
GO Term	BP_cell_cycle_G1_S_phase_transition	1	1	1
GO Term	BP_cell_cycle_G2_M_phase_transition	1	1	1
GO Term	BP_cell_fate_commitment	1	1	1
GO Term	BP_cell_growth	1	1	1
GO Term	BP_cell_junction_organization	1	1	1
GO Term	BP_cell_killing	1	1	1
GO Term	BP_cell_recognition	1	1	1
GO Term	BP_cell_redox_homeostasis	1	1	1
GO Term	BP_cell_substrate_adhesion	1	1	1
GO Term	BP_cell_surface_receptor_signaling_pathway_involved_in_heart_development	1	1	1
GO Term	BP_cellular_aldehyde_metabolic_process	1	1	1
GO Term	BP_cellular_amino_acid_metabolic_process	1	1	1
GO Term	BP_cellular_carbohydrate_metabolic_process	1	1	1
GO Term	BP_cellular_component_assembly_involved_in_morphogenesis	1	1	1
GO Term	BP_cellular_component_maintenance	1	1	1
GO Term	BP_cellular_defense_response	1	1	1
GO Term	BP_cellular_ketone_metabolic_process	1	1	1
GO Term	BP_cellular_metabolic_compound_salvage	1	1	1
GO Term	BP_cellular_modified_amino_acid_biosynthetic_process	1	1	1
GO Term	BP_cellular_modified_amino_acid_catabolic_process	1	1	1
GO Term	BP_cellular_modified_amino_acid_metabolic_process	1	1	1
GO Term	BP_cellular_process_involved_in_reproduction_in_multicellular_organism	1	1	1
GO Term	BP_cellular_response_to_biotic_stimulus	1	1	1
GO Term	BP_cellular_response_to_drug	1	1	1
GO Term	BP_cellular_response_to_environmental_stimulus	1	1	1
GO Term	BP_cellular_response_to_external_stimulus	1	1	1
GO Term	BP_cellular_response_to_inorganic_substance	1	1	1
GO Term	BP_cellular_response_to_lipoprotein_particle_stimulus	1	1	1
GO Term	BP_cellular_response_to_vascular_endothelial_growth_factor_stimulus	1	1	1
GO Term	BP_CENP_A_containing_chromatin_organization	1	1	1
GO Term	BP_central_nervous_system_neuron_differentiation	1	1	1
GO Term	BP_chaperone_mediated_protein_complex_assembly	1	1	1
GO Term	BP_chemical_synaptic_transmission__postsynaptic	1	1	1
GO Term	BP_chemokine_production	1	1	1
GO Term	BP_chromatin_assembly_or_disassembly	1	1	1
GO Term	BP_chromatin_remodeling	1	1	1
GO Term	BP_chromosome_localization	1	1	1
GO Term	BP_chromosome_segregation	1	1	1
GO Term	BP_cilium_or_flagellum_dependent_cell_motility	1	1	1
GO Term	BP_cilium_organization	1	1	1
GO Term	BP_circulatory_system_process	1	1	1
GO Term	BP_coagulation	1	1	1
GO Term	BP_coenzyme_metabolic_process	1	1	1
GO Term	BP_cofactor_biosynthetic_process	1	1	1
GO Term	BP_cofactor_catabolic_process	1	1	1
GO Term	BP_cofactor_transport	1	1	1
GO Term	BP_cognition	1	1	1
GO Term	BP_collagen_metabolic_process	1	1	1
GO Term	BP_columnar_cuboidal_epithelial_cell_differentiation	1	1	1
GO Term	BP_connective_tissue_development	1	1	1
GO Term	BP_coronary_vasculature_development	1	1	1
GO Term	BP_cortical_cytoskeleton_organization	1	1	1
GO Term	BP_covalent_chromatin_modification	1	1	1
GO Term	BP_cranial_skeletal_system_development	1	1	1
GO Term	BP_cyclic_nucleotide_metabolic_process	1	1	1
GO Term	BP_cytochrome_complex_assembly	1	1	1
GO Term	BP_cytokine_metabolic_process	1	1	1
GO Term	BP_cytokine_secretion	1	1	1
GO Term	BP_cytokinesis	1	1	1
GO Term	BP_cytolysis	1	1	1
GO Term	BP_cytoplasmic_microtubule_organization	1	1	1
GO Term	BP_cytoplasmic_translation	1	1	1
GO Term	BP_cytoskeleton_dependent_intracellular_transport	1	1	1
GO Term	BP_cytosolic_transport	1	1	1
GO Term	BP_defense_response_to_other_organism	1	1	1
GO Term	BP_demethylation	1	1	1
GO Term	BP_dendrite_development	1	1	1
GO Term	BP_deoxyribonucleotide_metabolic_process	1	1	1
GO Term	BP_deoxyribose_phosphate_metabolic_process	1	1	1
GO Term	BP_dephosphorylation	1	1	1
GO Term	BP_detection_of_abiotic_stimulus	1	1	1
GO Term	BP_detection_of_biotic_stimulus	1	1	1
GO Term	BP_detection_of_chemical_stimulus	1	1	1
GO Term	BP_detection_of_external_stimulus	1	1	1
GO Term	BP_detection_of_stimulus_involved_in_sensory_perception	1	1	1
GO Term	BP_developmental_growth_involved_in_morphogenesis	1	1	1
GO Term	BP_developmental_induction	1	1	1
GO Term	BP_developmental_maturation	1	1	1
GO Term	BP_dicarboxylic_acid_metabolic_process	1	1	1
GO Term	BP_digestion	1	1	1
GO Term	BP_digestive_system_development	1	1	1
GO Term	BP_divalent_inorganic_cation_homeostasis	1	0.71985	1
GO Term	BP_divalent_inorganic_cation_transport	1	1	1
GO Term	BP_DNA_biosynthetic_process	1	1	1
GO Term	BP_DNA_catabolic_process	1	1	1
GO Term	BP_DNA_conformation_change	1	1	1
GO Term	BP_DNA_damage_response__detection_of_DNA_damage	1	1	1
GO Term	BP_DNA_modification	1	1	1
GO Term	BP_DNA_recombination	1	1	1
GO Term	BP_DNA_replication	1	1	1
GO Term	BP_DNA_strand_elongation	1	1	1
GO Term	BP_DNA_templated_transcription__elongation	1	1	1
GO Term	BP_DNA_templated_transcription__initiation	1	1	1
GO Term	BP_DNA_templated_transcription__termination	1	1	1
GO Term	BP_dopamine_receptor_signaling_pathway	1	1	1
GO Term	BP_dopaminergic_neuron_differentiation	1	1	1
GO Term	BP_double_strand_break_repair	1	1	1
GO Term	BP_drug_catabolic_process	1	1	1
GO Term	BP_drug_transport	1	1	1
GO Term	BP_dsRNA_processing	1	1	1
GO Term	BP_ear_development	1	1	1
GO Term	BP_ectoderm_development	1	1	1
GO Term	BP_embryonic_organ_development	1	1	1
GO Term	BP_embryonic_skeletal_system_development	1	1	1
GO Term	BP_endocrine_process	1	1	1
GO Term	BP_endocrine_system_development	1	1	1
GO Term	BP_endoderm_development	1	1	1
GO Term	BP_endomembrane_system_organization	1	1	1
GO Term	BP_endoplasmic_reticulum_to_cytosol_transport	1	1	1
GO Term	BP_endosomal_transport	1	1	1
GO Term	BP_endothelium_development	1	1	1
GO Term	BP_ensheathment_of_neurons	1	1	1
GO Term	BP_ephrin_receptor_signaling_pathway	1	1	1
GO Term	BP_epidermis_development	1	1	1
GO Term	BP_epithelial_cell_apoptotic_process	1	1	1
GO Term	BP_epithelial_cell_development	1	1	1
GO Term	BP_epithelial_cell_proliferation	1	1	1
GO Term	BP_ER_nucleus_signaling_pathway	1	1	1
GO Term	BP_ERBB_signaling_pathway	1	1	1
GO Term	BP_ERK1_and_ERK2_cascade	1	1	1
GO Term	BP_establishment_of_organelle_localization	1	1	1
GO Term	BP_establishment_of_protein_localization_to_membrane	1	1	1
GO Term	BP_establishment_of_tissue_polarity	1	1	1
GO Term	BP_establishment_or_maintenance_of_cell_polarity	1	1	1
GO Term	BP_excretion	1	1	1
GO Term	BP_execution_phase_of_apoptosis	1	1	1
GO Term	BP_exocrine_system_development	1	1	1
GO Term	BP_exocytic_process	1	1	1
GO Term	BP_exploration_behavior	1	1	1
GO Term	BP_export_across_plasma_membrane	1	1	1
GO Term	BP_extracellular_regulation_of_signal_transduction	1	1	1
GO Term	BP_extracellular_structure_organization	1	1	1
GO Term	BP_extracellular_vesicle_biogenesis	1	1	1
GO Term	BP_extrinsic_apoptotic_signaling_pathway	1	1	1
GO Term	BP_face_development	1	1	1
GO Term	BP_fat_cell_differentiation	1	1	1
GO Term	BP_fatty_acid_derivative_metabolic_process	1	1	1
GO Term	BP_fatty_acid_derivative_transport	1	1	1
GO Term	BP_fatty_acid_metabolic_process	1	1	1
GO Term	BP_feeding_behavior	1	1	1
GO Term	BP_female_gamete_generation	1	1	1
GO Term	BP_fertilization	1	1	1
GO Term	BP_fibroblast_proliferation	1	1	1
GO Term	BP_filopodium_assembly	1	1	1
GO Term	BP_fluid_transport	1	1	1
GO Term	BP_foam_cell_differentiation	1	1	1
GO Term	BP_forebrain_development	1	1	1
GO Term	BP_G_protein_coupled_receptor_signaling_pathway__coupled_to_cyclic_nucleotide_second_messenger	1	1	1
GO Term	BP_G0_to_G1_transition	1	1	1
GO Term	BP_gamma_aminobutyric_acid_signaling_pathway	1	1	1
GO Term	BP_gastrulation	1	1	1
GO Term	BP_gene_silencing	1	1	1
GO Term	BP_generation_of_precursor_metabolites_and_energy	1	1	1
GO Term	BP_gland_development	1	1	1
GO Term	BP_gliogenesis	1	1	1
GO Term	BP_glucose_6_phosphate_metabolic_process	1	1	1
GO Term	BP_glutamate_receptor_signaling_pathway	1	1	1
GO Term	BP_glycerolipid_metabolic_process	1	1	1
GO Term	BP_glycoprotein_metabolic_process	1	1	1
GO Term	BP_glycosyl_compound_metabolic_process	1	1	1
GO Term	BP_glycosylation	1	1	1
GO Term	BP_Golgi_vesicle_transport	1	1	1
GO Term	BP_granulocyte_activation	1	1	1
GO Term	BP_heart_morphogenesis	1	1	1
GO Term	BP_heart_valve_development	1	1	1
GO Term	BP_hematopoietic_progenitor_cell_differentiation	1	1	1
GO Term	BP_hepaticobiliary_system_development	1	1	1
GO Term	BP_heterotypic_cell_cell_adhesion	1	1	1
GO Term	BP_hindbrain_development	1	1	1
GO Term	BP_hippo_signaling	1	1	1
GO Term	BP_histone_mRNA_metabolic_process	1	1	1
GO Term	BP_homeostasis_of_number_of_cells	1	1	1
GO Term	BP_homotypic_cell_cell_adhesion	1	1	1
GO Term	BP_hormone_mediated_signaling_pathway	1	1	1
GO Term	BP_hormone_metabolic_process	1	1	1
GO Term	BP_hormone_transport	1	1	1
GO Term	BP_humoral_immune_response	1	1	1
GO Term	BP_I_kappaB_kinase/NF-kappaB_signaling	1	1	1
GO Term	BP_immune_response_regulating_signaling_pathway	1	1	1
GO Term	BP_import_across_plasma_membrane	1	1	1
GO Term	BP_in_utero_embryonic_development	1	1	1
GO Term	BP_inclusion_body_assembly	1	1	1
GO Term	BP_indole_containing_compound_metabolic_process	1	1	1
GO Term	BP_inflammatory_response_to_antigenic_stimulus	1	1	1
GO Term	BP_inorganic_anion_transport	1	1	1
GO Term	BP_inositol_lipid_mediated_signaling	1	1	1
GO Term	BP_insulin_like_growth_factor_receptor_signaling_pathway	1	1	1
GO Term	BP_integrin_mediated_signaling_pathway	1	1	1
GO Term	BP_interaction_with_host	1	1	1
GO Term	BP_interaction_with_symbiont	1	1	1
GO Term	BP_interferon_gamma_production	1	1	1
GO Term	BP_interleukin_1_production	1	1	1
GO Term	BP_interleukin_10_production	1	1	1
GO Term	BP_interleukin_12_production	1	1	1
GO Term	BP_interleukin_13_production	1	1	1
GO Term	BP_interleukin_2_production	1	1	1
GO Term	BP_interleukin_4_production	1	1	1
GO Term	BP_interleukin_5_production	1	1	1
GO Term	BP_interleukin_6_production	1	1	1
GO Term	BP_interleukin_8_production	1	1	1
GO Term	BP_intermediate_filament_based_process	1	1	1
GO Term	BP_interstrand_cross_link_repair	1	1	1
GO Term	BP_intracellular_receptor_signaling_pathway	1	1	1
GO Term	BP_intraspecies_interaction_between_organisms	1	1	1
GO Term	BP_intrinsic_apoptotic_signaling_pathway	1	1	1
GO Term	BP_isoprenoid_metabolic_process	1	1	1
GO Term	BP_kinetochore_organization	1	1	1
GO Term	BP_lamellipodium_organization	1	1	1
GO Term	BP_leukocyte_activation_involved_in_inflammatory_response	1	1	1
GO Term	BP_leukocyte_apoptotic_process	1	1	1
GO Term	BP_leukocyte_cell_cell_adhesion	1	1	1
GO Term	BP_leukocyte_differentiation	1	1	1
GO Term	BP_leukocyte_migration	1	1	1
GO Term	BP_leukocyte_proliferation	1	1	1
GO Term	BP_lipid_catabolic_process	1	1	1
GO Term	BP_lipid_homeostasis	1	1	1
GO Term	BP_lipid_localization	1	1	1
GO Term	BP_lipid_modification	1	1	1
GO Term	BP_lipoprotein_localization	1	1	1
GO Term	BP_lipoprotein_metabolic_process	1	1	1
GO Term	BP_liposaccharide_metabolic_process	1	1	1
GO Term	BP_localization_within_membrane	1	1	1
GO Term	BP_locomotory_behavior	1	1	1
GO Term	BP_lymph_vessel_development	1	1	1
GO Term	BP_lymphocyte_activation_involved_in_immune_response	1	1	1
GO Term	BP_lymphocyte_mediated_immunity	1	1	1
GO Term	BP_lysosome_localization	1	1	1
GO Term	BP_macromolecule_deacylation	1	1	1
GO Term	BP_macrophage_activation	1	1	1
GO Term	BP_maintenance_of_cell_number	1	1	1
GO Term	BP_maintenance_of_location	1	1	1
GO Term	BP_mast_cell_activation	1	1	1
GO Term	BP_mast_cell_mediated_immunity	1	1	1
GO Term	BP_mating	1	1	1
GO Term	BP_mechanoreceptor_differentiation	1	1	1
GO Term	BP_meiotic_cell_cycle	1	1	1
GO Term	BP_membrane_biogenesis	1	1	1
GO Term	BP_membrane_docking	1	1	1
GO Term	BP_membrane_fusion	1	1	1
GO Term	BP_membrane_invagination	1	1	1
GO Term	BP_membrane_lipid_metabolic_process	1	1	1
GO Term	BP_membrane_protein_proteolysis	1	1	1
GO Term	BP_membrane_raft_organization	1	1	1
GO Term	BP_mesenchymal_cell_proliferation	1	1	1
GO Term	BP_mesenchyme_development	1	1	1
GO Term	BP_mesoderm_development	1	1	1
GO Term	BP_methylation	1	1	1
GO Term	BP_microtubule_anchoring	1	1	1
GO Term	BP_microtubule_based_movement	1	1	1
GO Term	BP_microtubule_bundle_formation	1	1	1
GO Term	BP_microtubule_cytoskeleton_organization_involved_in_mitosis	1	1	1
GO Term	BP_microtubule_organizing_center_localization	1	1	1
GO Term	BP_microtubule_organizing_center_organization	1	1	1
GO Term	BP_microtubule_polymerization_or_depolymerization	1	1	1
GO Term	BP_microvillus_organization	1	1	1
GO Term	BP_midbrain_development	1	1	1
GO Term	BP_mismatch_repair	1	1	1
GO Term	BP_mitochondrial_gene_expression	1	1	1
GO Term	BP_mitochondrial_genome_maintenance	1	1	1
GO Term	BP_mitochondrial_membrane_organization	1	1	1
GO Term	BP_mitochondrial_respiratory_chain_complex_assembly	1	1	1
GO Term	BP_mitochondrial_RNA_metabolic_process	1	1	1
GO Term	BP_mitochondrial_transport	1	1	1
GO Term	BP_mitochondrion_localization	1	1	1
GO Term	BP_mitochondrion_morphogenesis	1	1	1
GO Term	BP_mitotic_cell_cycle_phase_transition	1	1	1
GO Term	BP_modified_amino_acid_transport	1	1	1
GO Term	BP_modulation_of_process_of_other_organism	1	1	1
GO Term	BP_molting_cycle	1	1	1
GO Term	BP_monoamine_transport	1	1	1
GO Term	BP_monosaccharide_metabolic_process	1	1	1
GO Term	BP_monovalent_inorganic_cation_homeostasis	1	1	1
GO Term	BP_morphogenesis_of_a_branching_structure	1	1	1
GO Term	BP_morphogenesis_of_an_epithelium	1	1	1
GO Term	BP_mRNA_processing	1	1	1
GO Term	BP_multi_multicellular_organism_process	1	1	1
GO Term	BP_multi_organism_cellular_process	1	1	1
GO Term	BP_multi_organism_localization	1	1	1
GO Term	BP_multicellular_organism_growth	1	1	1
GO Term	BP_multicellular_organismal_homeostasis	1	1	1
GO Term	BP_multicellular_organismal_movement	1	1	1
GO Term	BP_multicellular_organismal_response_to_stress	1	1	1
GO Term	BP_multicellular_organismal_signaling	1	1	1
GO Term	BP_multivesicular_body_sorting_pathway	1	1	1
GO Term	BP_muscle_cell_apoptotic_process	1	1	1
GO Term	BP_muscle_cell_differentiation	1	1	1
GO Term	BP_muscle_cell_migration	1	1	1
GO Term	BP_muscle_cell_proliferation	1	1	1
GO Term	BP_muscle_organ_development	1	1	1
GO Term	BP_muscle_system_process	1	1	1
GO Term	BP_muscle_tissue_development	1	1	1
GO Term	BP_myeloid_cell_apoptotic_process	1	1	1
GO Term	BP_myeloid_cell_differentiation	1	1	1
GO Term	BP_myeloid_dendritic_cell_activation	1	1	1
GO Term	BP_myoblast_differentiation	1	1	1
GO Term	BP_N_terminal_protein_amino_acid_modification	1	1	1
GO Term	BP_NADH_dehydrogenase_complex_assembly	1	1	1
GO Term	BP_natural_killer_cell_activation	1	1	1
GO Term	BP_ncRNA_processing	1	1	1
GO Term	BP_ncRNA_transcription	1	1	1
GO Term	BP_necrotic_cell_death	1	1	1
GO Term	BP_negative_chemotaxis	1	1	1
GO Term	BP_negative_regulation_of_catabolic_process	1	1	1
GO Term	BP_negative_regulation_of_cell_activation	1	1	1
GO Term	BP_negative_regulation_of_cell_adhesion	1	1	1
GO Term	BP_negative_regulation_of_cell_cycle_process	1	1	1
GO Term	BP_negative_regulation_of_cell_development	1	1	1
GO Term	BP_negative_regulation_of_cell_projection_organization	1	1	1
GO Term	BP_negative_regulation_of_cellular_component_movement	1	1	1
GO Term	BP_negative_regulation_of_cellular_protein_localization	1	1	1
GO Term	BP_negative_regulation_of_cytokine_production	1	1	1
GO Term	BP_negative_regulation_of_defense_response	1	1	1
GO Term	BP_negative_regulation_of_establishment_of_protein_localization	1	1	1
GO Term	BP_negative_regulation_of_growth	1	1	1
GO Term	BP_negative_regulation_of_hydrolase_activity	1	1	1
GO Term	BP_negative_regulation_of_immune_system_process	1	1	1
GO Term	BP_negative_regulation_of_intracellular_signal_transduction	1	1	1
GO Term	BP_negative_regulation_of_locomotion	1	1	1
GO Term	BP_negative_regulation_of_mitotic_cell_cycle	1	1	1
GO Term	BP_negative_regulation_of_nervous_system_development	1	1	1
GO Term	BP_negative_regulation_of_organelle_organization	1	1	1
GO Term	BP_negative_regulation_of_phosphorylation	1	1	1
GO Term	BP_negative_regulation_of_proteolysis	1	1	1
GO Term	BP_negative_regulation_of_response_to_external_stimulus	1	1	1
GO Term	BP_negative_regulation_of_signaling_receptor_activity	1	1	1
GO Term	BP_negative_regulation_of_transferase_activity	1	1	1
GO Term	BP_negative_regulation_of_transport	1	1	1
GO Term	BP_nerve_development	1	1	1
GO Term	BP_neural_nucleus_development	1	1	1
GO Term	BP_neural_precursor_cell_proliferation	1	1	1
GO Term	BP_neural_tube_development	1	1	1
GO Term	BP_neuroinflammatory_response	1	1	1
GO Term	BP_neuromuscular_process	1	1	1
GO Term	BP_neuromuscular_synaptic_transmission	1	1	1
GO Term	BP_neuron_death	1	1	1
GO Term	BP_neuron_migration	1	1	1
GO Term	BP_neuron_projection_fasciculation	1	1	1
GO Term	BP_neuron_projection_guidance	1	1	1
GO Term	BP_neuron_projection_organization	1	1	1
GO Term	BP_neuropeptide_signaling_pathway	1	1	1
GO Term	BP_neurotransmitter_transport	1	1	1
GO Term	BP_neurotrophin_signaling_pathway	1	1	1
GO Term	BP_neutral_lipid_metabolic_process	1	1	1
GO Term	BP_neutrophil_mediated_immunity	1	1	1
GO Term	BP_NIK_NF_kappaB_signaling	1	1	1
GO Term	BP_non_recombinational_repair	1	1	1
GO Term	BP_Notch_signaling_pathway	1	1	1
GO Term	BP_nuclear_transport	1	1	1
GO Term	BP_nucleic_acid_phosphodiester_bond_hydrolysis	1	1	1
GO Term	BP_nucleobase_containing_compound_transport	1	1	1
GO Term	BP_nucleobase_containing_small_molecule_biosynthetic_process	1	1	1
GO Term	BP_nucleobase_containing_small_molecule_interconversion	1	1	1
GO Term	BP_nucleobase_metabolic_process	1	1	1
GO Term	BP_nucleoside_bisphosphate_metabolic_process	1	1	1
GO Term	BP_nucleoside_diphosphate_metabolic_process	1	1	1
GO Term	BP_nucleoside_monophosphate_metabolic_process	1	1	1
GO Term	BP_nucleoside_phosphate_biosynthetic_process	1	1	1
GO Term	BP_nucleoside_triphosphate_metabolic_process	1	1	1
GO Term	BP_nucleotide_excision_repair	1	1	1
GO Term	BP_nucleotide_phosphorylation	1	1	1
GO Term	BP_nucleotide_sugar_metabolic_process	1	1	1
GO Term	BP_nucleus_localization	1	1	1
GO Term	BP_nucleus_organization	1	1	1
GO Term	BP_obsolete_movement_in_environment_of_other_organism_involved_in_symbiotic_interaction	1	1	1
GO Term	BP_obsolete_multi_organism_behavior	1	1	1
GO Term	BP_odontogenesis	1	1	1
GO Term	BP_oligosaccharide_lipid_intermediate_biosynthetic_process	1	1	1
GO Term	BP_oligosaccharide_metabolic_process	1	1	1
GO Term	BP_one_carbon_metabolic_process	1	1	1
GO Term	BP_organ_growth	1	1	1
GO Term	BP_organ_or_tissue_specific_immune_response	1	1	1
GO Term	BP_organelle_disassembly	1	1	1
GO Term	BP_organelle_fission	1	1	1
GO Term	BP_organelle_fusion	1	1	1
GO Term	BP_organic_acid_biosynthetic_process	1	1	1
GO Term	BP_organic_acid_transport	1	1	1
GO Term	BP_organic_anion_transport	1	1	1
GO Term	BP_organic_cation_transport	1	1	1
GO Term	BP_organic_hydroxy_compound_metabolic_process	1	1	1
GO Term	BP_organic_hydroxy_compound_transport	1	1	1
GO Term	BP_organism_emergence_from_protective_structure	1	1	1
GO Term	BP_organophosphate_catabolic_process	1	1	1
GO Term	BP_organophosphate_ester_transport	1	1	1
GO Term	BP_ossification	1	1	1
GO Term	BP_osteoblast_proliferation	1	1	1
GO Term	BP_pancreas_development	1	1	1
GO Term	BP_pattern_specification_process	1	1	1
GO Term	BP_peptide_catabolic_process	1	1	1
GO Term	BP_peptide_cross_linking	1	1	1
GO Term	BP_peptidyl_arginine_modification	1	1	1
GO Term	BP_peptidyl_asparagine_modification	1	1	1
GO Term	BP_peptidyl_cysteine_modification	1	1	1
GO Term	BP_peptidyl_glutamic_acid_modification	1	1	1
GO Term	BP_peptidyl_lysine_modification	1	1	1
GO Term	BP_peptidyl_proline_modification	1	1	1
GO Term	BP_peptidyl_serine_modification	1	1	1
GO Term	BP_peptidyl_threonine_modification	1	1	1
GO Term	BP_peptidyl_tyrosine_modification	1	1	1
GO Term	BP_pericardium_development	1	1	1
GO Term	BP_peripheral_nervous_system_development	1	1	1
GO Term	BP_peroxisomal_transport	1	1	1
GO Term	BP_peroxisome_organization	1	1	1
GO Term	BP_phagocytosis	1	1	1
GO Term	BP_phagosome_maturation	1	1	1
GO Term	BP_pharyngeal_system_development	1	1	1
GO Term	BP_phospholipase_C_activating_G_protein_coupled_receptor_signaling_pathway	1	1	1
GO Term	BP_phospholipid_metabolic_process	1	1	1
GO Term	BP_photoreceptor_cell_differentiation	1	1	1
GO Term	BP_pigment_metabolic_process	1	1	1
GO Term	BP_pigmentation	1	1	0.591195
GO Term	BP_pinocytosis	1	1	1
GO Term	BP_platelet_degranulation	1	1	1
GO Term	BP_platelet_derived_growth_factor_receptor_signaling_pathway	1	1	1
GO Term	BP_platelet_morphogenesis	1	1	1
GO Term	BP_podosome_assembly	1	1	1
GO Term	BP_polysaccharide_metabolic_process	1	1	1
GO Term	BP_positive_chemotaxis	1	1	1
GO Term	BP_positive_regulation_of_catabolic_process	1	1	1
GO Term	BP_positive_regulation_of_cell_activation	1	1	1
GO Term	BP_positive_regulation_of_cell_adhesion	1	1	1
GO Term	BP_positive_regulation_of_cell_cycle	1	1	1
GO Term	BP_positive_regulation_of_cell_motility	1	1	1
GO Term	BP_positive_regulation_of_cell_projection_organization	1	1	1
GO Term	BP_positive_regulation_of_cellular_protein_localization	1	1	1
GO Term	BP_positive_regulation_of_cytokine_production	1	1	1
GO Term	BP_positive_regulation_of_defense_response	1	1	1
GO Term	BP_positive_regulation_of_establishment_of_protein_localization	1	1	1
GO Term	BP_positive_regulation_of_growth	1	1	1
GO Term	BP_positive_regulation_of_ion_transport	1	1	1
GO Term	BP_positive_regulation_of_neurogenesis	1	1	1
GO Term	BP_positive_regulation_of_proteolysis	1	1	1
GO Term	BP_positive_regulation_of_response_to_external_stimulus	1	1	1
GO Term	BP_positive_regulation_of_secretion	1	1	1
GO Term	BP_positive_regulation_of_signaling_receptor_activity	1	1	1
GO Term	BP_positive_regulation_of_transmembrane_transport	1	1	1
GO Term	BP_post_embryonic_development	1	1	1
GO Term	BP_post_translational_protein_modification	1	1	1
GO Term	BP_postreplication_repair	1	1	1
GO Term	BP_posttranscriptional_regulation_of_gene_expression	1	1	1
GO Term	BP_potassium_ion_transport	1	1	1
GO Term	BP_pri_miRNA_transcription_by_RNA_polymerase_II	1	1	1
GO Term	BP_process_utilizing_autophagic_mechanism	1	1	1
GO Term	BP_production_of_molecular_mediator_involved_in_inflammatory_response	1	1	1
GO Term	BP_production_of_molecular_mediator_of_immune_response	1	1	1
GO Term	BP_proteasomal_protein_catabolic_process	1	1	1
GO Term	BP_protein_activation_cascade	1	1	1
GO Term	BP_protein_acylation	1	1	1
GO Term	BP_protein_ADP_ribosylation	1	1	1
GO Term	BP_protein_alkylation	1	1	1
GO Term	BP_protein_autophosphorylation	1	1	1
GO Term	BP_protein_autoubiquitination	1	1	1
GO Term	BP_protein_containing_complex_disassembly	1	1	1
GO Term	BP_protein_containing_complex_localization	1	1	1
GO Term	BP_protein_containing_complex_remodeling	1	1	1
GO Term	BP_protein_DNA_complex_subunit_organization	1	1	1
GO Term	BP_protein_exit_from_endoplasmic_reticulum	1	1	1
GO Term	BP_protein_folding	1	1	1
GO Term	BP_protein_heterooligomerization	1	1	1
GO Term	BP_protein_homooligomerization	1	1	1
GO Term	BP_protein_hydroxylation	1	1	1
GO Term	BP_protein_import	1	1	1
GO Term	BP_protein_kinase_A_signaling	1	1	1
GO Term	BP_protein_kinase_B_signaling	1	1	1
GO Term	BP_protein_kinase_C_activating_G_protein_coupled_receptor_signaling_pathway	1	1	1
GO Term	BP_protein_kinase_C_signaling	1	1	1
GO Term	BP_protein_lipid_complex_subunit_organization	1	1	1
GO Term	BP_protein_localization_to_cell_periphery	1	1	1
GO Term	BP_protein_localization_to_cell_surface	1	1	1
GO Term	BP_protein_localization_to_chromosome	1	1	1
GO Term	BP_protein_localization_to_cilium	1	1	1
GO Term	BP_protein_localization_to_cytoskeleton	1	1	1
GO Term	BP_protein_localization_to_endoplasmic_reticulum	1	1	1
GO Term	BP_protein_localization_to_Golgi_apparatus	1	1	1
GO Term	BP_protein_localization_to_mitochondrion	1	1	1
GO Term	BP_protein_localization_to_nucleus	1	1	1
GO Term	BP_protein_localization_to_synapse	1	1	1
GO Term	BP_protein_localization_to_vacuole	1	1	1
GO Term	BP_protein_maturation	1	1	1
GO Term	BP_protein_modification_by_small_protein_removal	1	1	1
GO Term	BP_protein_monoubiquitination	1	1	1
GO Term	BP_protein_polymerization	1	1	1
GO Term	BP_protein_polyubiquitination	1	1	1
GO Term	BP_protein_quality_control_for_misfolded_or_incompletely_synthesized_proteins	1	1	1
GO Term	BP_protein_targeting	1	1	1
GO Term	BP_protein_tetramerization	1	1	1
GO Term	BP_protein_transmembrane_transport	1	1	1
GO Term	BP_protein_trimerization	1	1	1
GO Term	BP_proton_transmembrane_transport	1	1	1
GO Term	BP_pteridine_containing_compound_metabolic_process	1	1	1
GO Term	BP_purine_containing_compound_biosynthetic_process	1	1	1
GO Term	BP_purine_containing_compound_catabolic_process	1	1	1
GO Term	BP_purinergic_nucleotide_receptor_signaling_pathway	1	1	1
GO Term	BP_pyridine_containing_compound_metabolic_process	1	1	1
GO Term	BP_pyrimidine_containing_compound_metabolic_process	1	1	1
GO Term	BP_pyruvate_metabolic_process	1	1	1
GO Term	BP_Ras_protein_signal_transduction	1	1	1
GO Term	BP_reactive_nitrogen_species_metabolic_process	1	1	1
GO Term	BP_reactive_oxygen_species_metabolic_process	1	1	1
GO Term	BP_receptor_mediated_endocytosis	1	1	1
GO Term	BP_receptor_metabolic_process	1	1	1
GO Term	BP_receptor_signaling_pathway_via_STAT	1	1	1
GO Term	BP_regeneration	1	1	1
GO Term	BP_regulation_of_actin_filament_based_process	1	1	1
GO Term	BP_regulation_of_anatomical_structure_size	1	1	1
GO Term	BP_regulation_of_animal_organ_morphogenesis	1	1	1
GO Term	BP_regulation_of_anion_transport	1	1	1
GO Term	BP_regulation_of_apoptotic_signaling_pathway	1	1	1
GO Term	BP_regulation_of_ATPase_activity	1	1	1
GO Term	BP_regulation_of_behavior	1	1	1
GO Term	BP_regulation_of_binding	1	1	1
GO Term	BP_regulation_of_body_fluid_levels	1	1	1
GO Term	BP_regulation_of_carbohydrate_metabolic_process	1	1	1
GO Term	BP_regulation_of_cell_cell_adhesion	1	1	1
GO Term	BP_regulation_of_cell_cycle_phase_transition	1	1	1
GO Term	BP_regulation_of_cell_division	1	1	1
GO Term	BP_regulation_of_cell_morphogenesis	1	1	1
GO Term	BP_regulation_of_cell_projection_assembly	1	1	1
GO Term	BP_regulation_of_cellular_amide_metabolic_process	1	1	1
GO Term	BP_regulation_of_cellular_response_to_growth_factor_stimulus	1	1	1
GO Term	BP_regulation_of_chemotaxis	1	1	1
GO Term	BP_regulation_of_chromosome_organization	1	1	1
GO Term	BP_regulation_of_cofactor_metabolic_process	1	1	1
GO Term	BP_regulation_of_cyclase_activity	1	1	1
GO Term	BP_regulation_of_cyclin_dependent_protein_kinase_activity	1	1	1
GO Term	BP_regulation_of_cytoskeleton_organization	1	1	1
GO Term	BP_regulation_of_defense_response_to_virus_by_virus	1	1	1
GO Term	BP_regulation_of_developmental_growth	1	1	1
GO Term	BP_regulation_of_DNA_binding_transcription_factor_activity	1	1	1
GO Term	BP_regulation_of_DNA_metabolic_process	1	1	1
GO Term	BP_regulation_of_DNA_templated_transcription_in_response_to_stress	1	1	1
GO Term	BP_regulation_of_embryonic_development	1	1	1
GO Term	BP_regulation_of_epithelial_cell_differentiation	1	1	1
GO Term	BP_regulation_of_G_protein_coupled_receptor_signaling_pathway	1	1	1
GO Term	BP_regulation_of_gene_expression__epigenetic	1	1	1
GO Term	BP_regulation_of_GTPase_activity	1	1	1
GO Term	BP_regulation_of_hemopoiesis	1	1	1
GO Term	BP_regulation_of_immune_effector_process	1	1	1
GO Term	BP_regulation_of_inflammatory_response	1	1	1
GO Term	BP_regulation_of_innate_immune_response	1	1	0.67035
GO Term	BP_regulation_of_intracellular_transport	1	1	1
GO Term	BP_regulation_of_ion_transmembrane_transport	1	1	1
GO Term	BP_regulation_of_leukocyte_activation	1	1	1
GO Term	BP_regulation_of_lipase_activity	1	1	1
GO Term	BP_regulation_of_lipid_metabolic_process	1	1	1
GO Term	BP_regulation_of_lyase_activity	1	1	1
GO Term	BP_regulation_of_membrane_lipid_distribution	1	1	1
GO Term	BP_regulation_of_membrane_permeability	1	1	1
GO Term	BP_regulation_of_membrane_potential	1	1	1
GO Term	BP_regulation_of_metal_ion_transport	1	1	1
GO Term	BP_regulation_of_microtubule_based_process	1	1	1
GO Term	BP_regulation_of_mitochondrion_organization	1	1	1
GO Term	BP_regulation_of_mRNA_metabolic_process	1	1	1
GO Term	BP_regulation_of_multi_organism_process	1	1	1
GO Term	BP_regulation_of_nervous_system_process	1	1	1
GO Term	BP_regulation_of_neuron_projection_development	1	1	1
GO Term	BP_regulation_of_neurotransmitter_levels	1	1	1
GO Term	BP_regulation_of_neurotransmitter_receptor_activity	1	1	1
GO Term	BP_regulation_of_nuclease_activity	1	1	1
GO Term	BP_regulation_of_organelle_assembly	1	1	1
GO Term	BP_regulation_of_oxidoreductase_activity	1	1	1
GO Term	BP_regulation_of_peptidase_activity	1	1	1
GO Term	BP_regulation_of_peptide_secretion	1	1	1
GO Term	BP_regulation_of_plasma_lipoprotein_particle_levels	1	1	1
GO Term	BP_regulation_of_postsynaptic_membrane_neurotransmitter_receptor_levels	1	1	1
GO Term	BP_regulation_of_protein_catabolic_process	1	1	1
GO Term	BP_regulation_of_protein_containing_complex_assembly	1	1	1
GO Term	BP_regulation_of_protein_localization_to_membrane	1	1	1
GO Term	BP_regulation_of_protein_modification_by_small_protein_conjugation_or_removal	1	1	1
GO Term	BP_regulation_of_protein_serine_threonine_kinase_activity	1	1	1
GO Term	BP_regulation_of_protein_stability	1	1	1
GO Term	BP_regulation_of_reproductive_process	1	1	1
GO Term	BP_regulation_of_response_to_biotic_stimulus	1	1	1
GO Term	BP_regulation_of_response_to_cytokine_stimulus	1	1	1
GO Term	BP_regulation_of_response_to_DNA_damage_stimulus	1	1	1
GO Term	BP_regulation_of_response_to_drug	1	1	1
GO Term	BP_regulation_of_response_to_extracellular_stimulus	1	1	1
GO Term	BP_regulation_of_response_to_wounding	1	1	1
GO Term	BP_regulation_of_small_GTPase_mediated_signal_transduction	1	1	1
GO Term	BP_regulation_of_small_molecule_metabolic_process	1	1	1
GO Term	BP_regulation_of_supramolecular_fiber_organization	1	1	1
GO Term	BP_regulation_of_synapse_structure_or_activity	1	1	1
GO Term	BP_regulation_of_trans_synaptic_signaling	1	1	1
GO Term	BP_regulation_of_transporter_activity	1	1	1
GO Term	BP_regulation_of_vasculature_development	1	1	1
GO Term	BP_regulation_of_vesicle_mediated_transport	1	1	1
GO Term	BP_renal_system_process	1	1	1
GO Term	BP_reproductive_behavior	1	1	1
GO Term	BP_reproductive_system_development	1	1	1
GO Term	BP_respiratory_burst	1	1	1
GO Term	BP_respiratory_gaseous_exchange_by_respiratory_system	1	1	1
GO Term	BP_respiratory_system_development	1	1	1
GO Term	BP_respiratory_tube_development	1	1	1
GO Term	BP_response_to_acid_chemical	1	1	1
GO Term	BP_response_to_activity	1	1	1
GO Term	BP_response_to_alcohol	1	1	1
GO Term	BP_response_to_alkaloid	1	1	1
GO Term	BP_response_to_amine	1	1	1
GO Term	BP_response_to_ammonium_ion	1	1	1
GO Term	BP_response_to_anesthetic	1	1	1
GO Term	BP_response_to_antibiotic	1	1	1
GO Term	BP_response_to_antineoplastic_agent	1	1	1
GO Term	BP_response_to_arsenic_containing_substance	1	1	1
GO Term	BP_response_to_axon_injury	1	1	1
GO Term	BP_response_to_BMP	1	1	1
GO Term	BP_response_to_bronchodilator	1	1	1
GO Term	BP_response_to_carbohydrate	1	1	1
GO Term	BP_response_to_chemokine	1	1	1
GO Term	BP_response_to_dsRNA	1	1	1
GO Term	BP_response_to_electrical_stimulus	1	1	1
GO Term	BP_response_to_endoplasmic_reticulum_stress	1	1	1
GO Term	BP_response_to_epidermal_growth_factor	1	1	1
GO Term	BP_response_to_estradiol	1	1	1
GO Term	BP_response_to_estrogen	1	1	1
GO Term	BP_response_to_fibroblast_growth_factor	1	1	1
GO Term	BP_response_to_fluid_shear_stress	1	1	1
GO Term	BP_response_to_fungus	1	1	1
GO Term	BP_response_to_gonadotropin	1	1	1
GO Term	BP_response_to_immobilization_stress	1	1	1
GO Term	BP_response_to_interferon_beta	1	1	1
GO Term	BP_response_to_interferon_gamma	1	1	1
GO Term	BP_response_to_interleukin_1	1	1	1
GO Term	BP_response_to_interleukin_12	1	1	1
GO Term	BP_response_to_interleukin_4	1	1	1
GO Term	BP_response_to_interleukin_6	1	1	1
GO Term	BP_response_to_interleukin_7	1	1	1
GO Term	BP_response_to_ischemia	1	1	1
GO Term	BP_response_to_ketone	1	1	1
GO Term	BP_response_to_leukemia_inhibitory_factor	1	1	1
GO Term	BP_response_to_lipoprotein_particle	1	1	1
GO Term	BP_response_to_mechanical_stimulus	1	1	1
GO Term	BP_response_to_metal_ion	1	1	1
GO Term	BP_response_to_mitochondrial_depolarisation	1	1	1
GO Term	BP_response_to_molecule_of_bacterial_origin	1	1	1
GO Term	BP_response_to_monoamine	1	1	1
GO Term	BP_response_to_nerve_growth_factor	1	1	1
GO Term	BP_response_to_nutrient_levels	1	1	1
GO Term	BP_response_to_organophosphorus	1	1	1
GO Term	BP_response_to_osmotic_stress	1	1	1
GO Term	BP_response_to_oxidative_stress	1	1	1
GO Term	BP_response_to_oxygen_levels	1	1	1
GO Term	BP_response_to_peptide	1	1	1
GO Term	BP_response_to_pH	1	1	1
GO Term	BP_response_to_protozoan	1	1	1
GO Term	BP_response_to_purine_containing_compound	1	1	1
GO Term	BP_response_to_radiation	1	1	1
GO Term	BP_response_to_steroid_hormone	1	1	1
GO Term	BP_response_to_sterol	1	1	1
GO Term	BP_response_to_temperature_stimulus	1	1	1
GO Term	BP_response_to_thyroid_hormone	1	1	1
GO Term	BP_response_to_topologically_incorrect_protein	1	1	1
GO Term	BP_response_to_toxic_substance	1	1	1
GO Term	BP_response_to_transforming_growth_factor_beta	1	1	1
GO Term	BP_response_to_tumor_cell	1	1	1
GO Term	BP_response_to_tumor_necrosis_factor	1	1	1
GO Term	BP_response_to_type_I_interferon	1	1	1
GO Term	BP_response_to_virus	1	1	1
GO Term	BP_response_to_xenobiotic_stimulus	1	1	1
GO Term	BP_rhythmic_process	1	1	1
GO Term	BP_ribonucleoprotein_complex_biogenesis	1	1	1
GO Term	BP_ribonucleoprotein_complex_localization	1	1	1
GO Term	BP_ribonucleoprotein_complex_subunit_organization	1	1	1
GO Term	BP_ribonucleotide_metabolic_process	1	1	1
GO Term	BP_ribose_phosphate_biosynthetic_process	1	1	1
GO Term	BP_RNA_3_-end_processing	1	1	1
GO Term	BP_RNA_capping	1	1	1
GO Term	BP_RNA_catabolic_process	1	1	1
GO Term	BP_RNA_localization	1	1	1
GO Term	BP_RNA_modification	1	1	1
GO Term	BP_RNA_polyadenylation	1	1	1
GO Term	BP_RNA_splicing	1	1	1
GO Term	BP_roof_of_mouth_development	1	1	1
GO Term	BP_rRNA_metabolic_process	1	1	1
GO Term	BP_ruffle_organization	1	1	1
[truncated: 523 more rows]
